# Supplementary material for: Multisite SUMOylation restrains DNA polymerase η interactions with DNA damage sites
Source: PubMed Central journal article supplement (PMC7307195; doi:10.1074/jbc.ra120.013780), 2020-04-29
Supplement: supp_RA120.013780_160008_1_supp_518709_q9cls7.pdf [file supp_RA120.013780_160008_1_supp_518709_q9cls7.pdf]

Supporting Information for

**Multi-site SUMOylation restrains DNA Polymerase  $\eta$  interactions with DNA damage sites**

**Claire Guérillon<sup>1</sup>, Stine Smedegaard<sup>1</sup>, Ivo A. Hendriks<sup>2</sup>, Michael L. Nielsen<sup>2</sup> and Niels Mailand<sup>1,\*</sup>**

<sup>1</sup>Ubiquitin Signaling Group, Protein Signaling Program, Novo Nordisk Foundation Center for Protein Research, Faculty of Health and Medical Sciences, University of Copenhagen, Blegdamsvej 3B, DK-2200 Copenhagen, Denmark.

<sup>2</sup>Proteomics Program, Novo Nordisk Foundation Center for Protein Research, Faculty of Health and Medical Sciences, University of Copenhagen, Blegdamsvej 3B, DK-2200 Copenhagen, Denmark

**Table S1.****Results of high-throughput microscopy screen for regulators of Pol  $\eta$  interaction with DNA damage sites**

U2OS/GFP-Pol  $\eta$  cells were transfected with an siRNA library targeting ubiquitin and UBL signaling factors (1251 genes, two siRNAs per gene). After 72 h, cells were treated with 30  $\mu$ M Cisplatin for 6 h and subsequently grown overnight in fresh media. Cells were then pre-extracted, fixed and stained with DAPI. GFP-Pol  $\eta$  foci counts were determined using QIBC. Table shows modified Z-scores for all siRNAs in the library.

**Table S2.****List of validated Ub/UBL signaling factors whose knockdown leads to enhanced formation of DNA damage-induced Pol  $\eta$  foci****Table S3.****Overview of endogenous Pol  $\eta$  SUMOylation sites identified by mass spectrometry****Figure S1.****SUMO-dependent regulation of Pol  $\eta$  association with DNA damage sites.**

**A.** Immunoblot analysis of whole-cell extracts (WCE) of U2OS cells transfected with non-targeting control (CTRL) siRNA or siRNAs targeting indicated SUMO enzymes. Expression levels of SAE1, UBA2 and UBC9 (normalized to MCM6 expression) were quantified using ImageJ. **B.** Results of validation screen. The sum of GFP-Pol  $\eta$  foci intensity in U2OS/GFP-Pol  $\eta$  cells transfected with indicated siRNAs, exposed to cisplatin for 6 h and fixed 16 h later was quantified using QIBC analysis (mean $\pm$ SD;  $\geq$ 294 cells quantified per condition). **C.** Results of validation screen. The sum of GFP-Pol  $\eta$  foci intensity at different time points after exposure to cisplatin in cells treated as in (B) was quantified using QIBC analysis (mean $\pm$ SD;  $\geq$ 3,000 cells quantified per condition). **D.** U2OS/GFP-Pol  $\eta$  cells were treated or not with SUMO E1 inhibitor (SUMOi) for 30 min, exposed to UV and fixed 6 h later. GFP-Pol  $\eta$  foci count per nucleus was quantified by QIBC analysis (mean $\pm$ SEM;  $n=3$  independent experiments;  $\geq$ 7,482 cells quantified per condition).

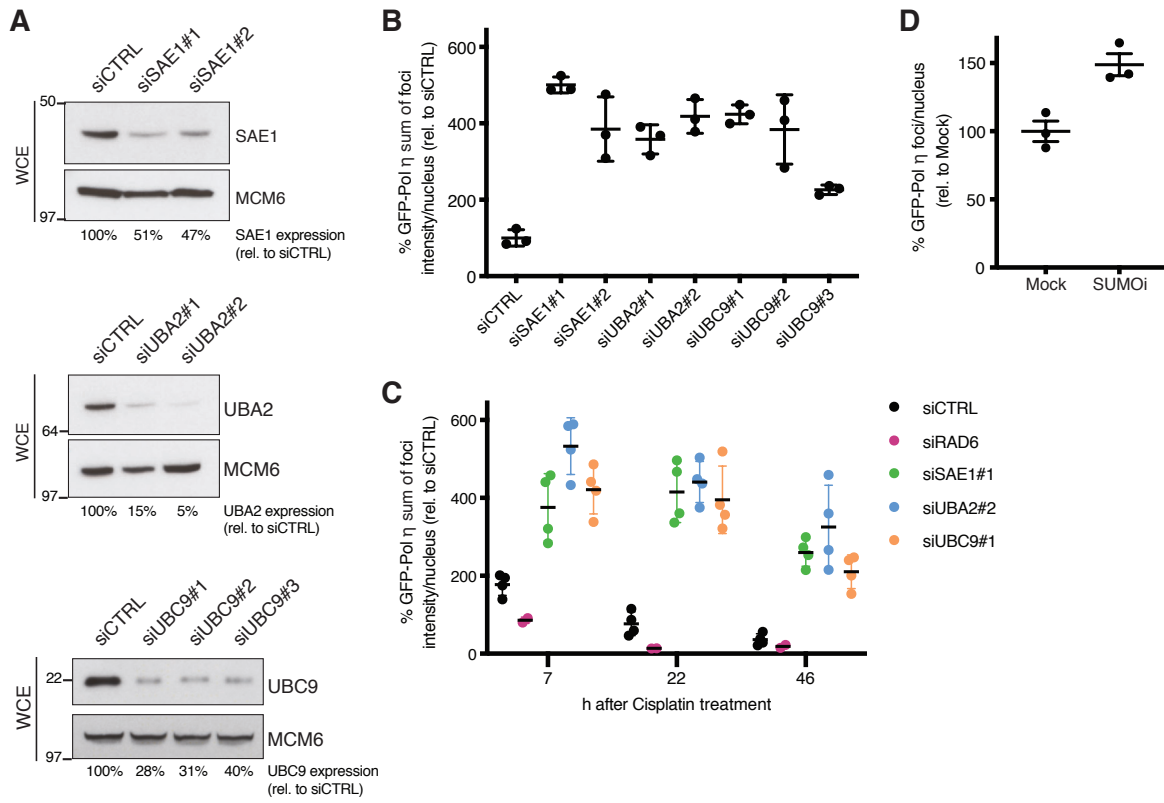

**Figure S2.**

**Impact of removing SUMO modification components on cell cycle distribution, PCNA monoubiquitylation and Pol  $\eta$  SUMOylation**

**A.** U2OS cells transfected with indicated siRNAs were pulse-labeled with EdU, fixed and processed for EdU labeling and staining of total DNA with DAPI. Cell cycle profiles were analyzed using QIBC ( $\geq 1869$  cells quantified per condition). Percentage of cells in different cell cycle stages (G1 phase, blue; S phase, pink; G2/M phase, green) is indicated. **B.** Immunoblot analysis of chromatin-enriched fractions of U2OS cells transfected with indicated siRNAs and exposed to UV. **C.** U2OS left untreated or transfected with plasmids encoding the indicated GFP-Pol  $\eta$  alleles and exposed to UV were lysed and subjected to GFP immunoprecipitation (IP) under denaturing conditions, followed by immunoblotting with SUMO2/3, GFP and MCM6 (loading control) antibodies. **D.** Quantification of GFP-Pol  $\eta$  foci formation in U2OS/GFP-Pol  $\eta$  collected at indicated times after exposure to UV (mean $\pm$ SEM;  $n=2$  independent experiments;  $\geq 508$  cells quantified per condition). **E.** U2OS/GFP-Pol  $\eta$  cells transfected with indicated siRNAs and exposed to UV were lysed and subjected to GFP immunoprecipitation (IP) under denaturing conditions, followed by immunoblotting with SUMO2/3, GFP and MCM6 (loading control) antibodies. **F.** Cell cycle profiles of cells transfected with indicated PIAS1 siRNAs or non-targeting control (CTRL) siRNA were determined as in (A) ( $\geq 2936$  cells quantified per condition).

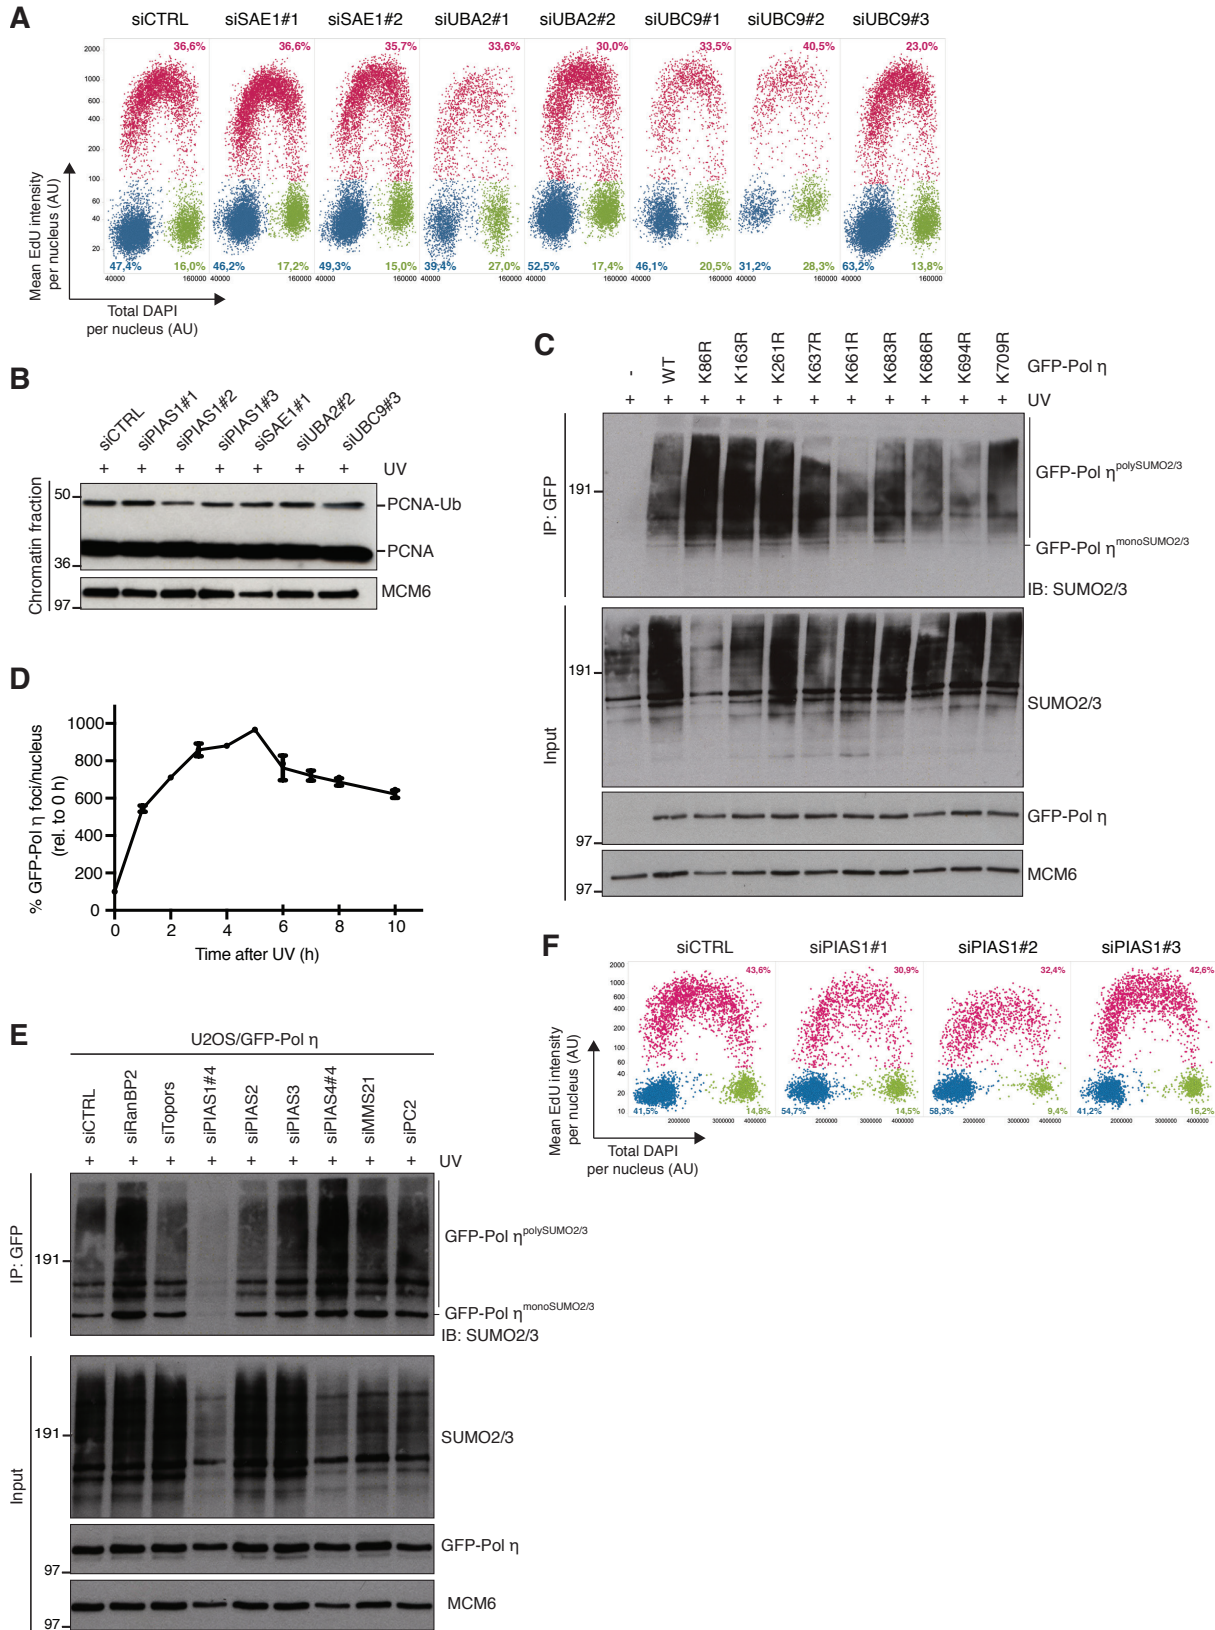

### Figure S3.

#### Impact of impaired SUMO-dependent processing of Pol $\eta$ on its association with DNA damage sites and TLS functionality

**A.** Quantification of the sum of GFP-Pol  $\eta$  foci intensity using QIBC analysis in U2OS/GFP-Pol  $\eta$  cells transfected with indicated siRNAs, exposed to UV and fixed 6 h later (mean $\pm$ SEM;  $n=2$  independent experiments;  $\geq 1991$  cells quantified per condition). **B.** Immunoblot analysis of U2OS cells transfected with non-targeting control (CTRL) or RNF4 siRNAs using indicated antibodies. **C.** qPCR analysis of RNF111 mRNA levels in U2OS cells transfected with indicated siRNAs relative to siCTRL. Primers to GAPDH were used as a normalization control (mean $\pm$ SEM;  $n=2$  independent experiments). **D.** Quantification of the sum of GFP-Pol  $\eta$  foci intensity using QIBC analysis in U2OS/GFP-Pol  $\eta$  cells transfected with indicated siRNAs and treated as in (A) (mean $\pm$ SEM;  $n=4$  independent experiments;  $\geq 1254$  cells quantified per condition). **E.** U2OS cell lines stably expressing GFP-Pol  $\eta$  WT or 20KR mutant (clone 1 (c1) and clone 2 (c2)) were transfected or not with siRNA targeting the 3'UTR of endogenous Pol  $\eta$  (siPol  $\eta$ #2), exposed to UV (5 J/m<sup>2</sup>) and fixed 6 h later. Cells were then stained with antibody specific to cyclobutane pyrimidine dimers (CPDs) under native conditions, where only CPDs in single-stranded DNA (ssDNA) are exposed, and CPD intensity per nucleus was quantified by QIBC analysis (mean $\pm$ SEM;  $n=2$  independent experiments;  $\geq 10,086$  cells quantified per condition). Both GFP-Pol  $\eta$  WT or 20KR are able to rescue the increased occurrence of CPDs in ssDNA resulting from knockdown of endogenous Pol  $\eta$ , indicating that both alleles are proficient for TLS-mediated bypass of these lesions. **F.** Clonogenic survival of U2OS cells and derivative stable U2OS/NLS-GFP-Pol  $\eta$  WT and U2OS/NLS-GFP-Pol  $\eta$  20KR mutant (c1) cell lines transfected with siCTRL or siPol  $\eta$ #2 and exposed to the indicated doses of UV. After UV radiation the medium was supplemented with 0,4 mM caffeine (mean $\pm$ SEM;  $n=2$  experiments).

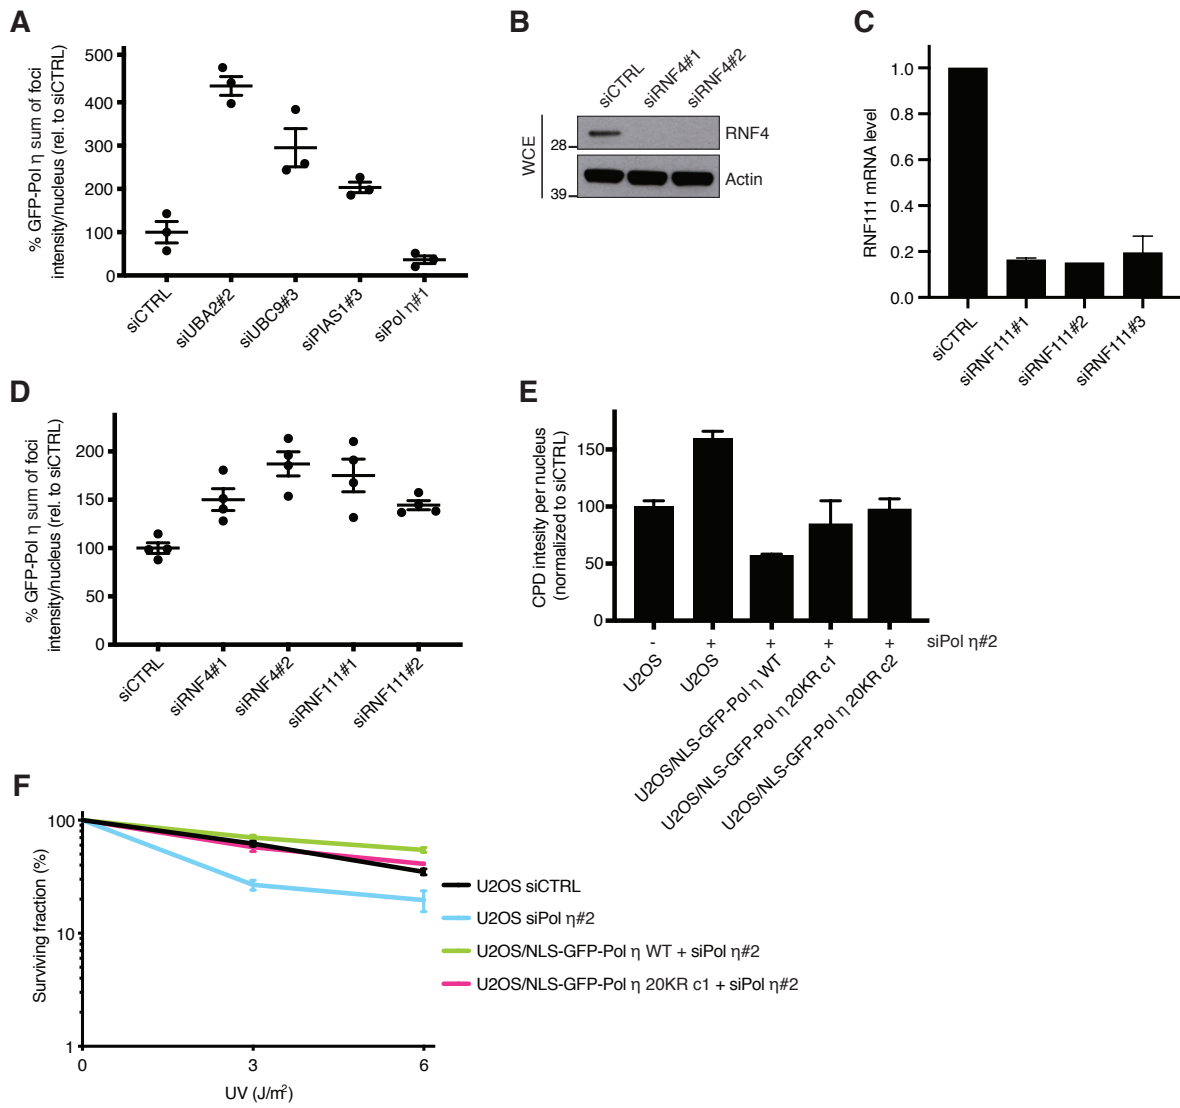

**Figure S4.**

**MS spectra for identified SUMO sites in human Pol  $\eta$**

A collection of 19 fully annotated MS/MS spectra corresponding to all POLH SUMO sites reported in this work. Both “Standard” and “Advanced” annotations via the built-in MaxQuant Viewer software are available for each spectrum. Note that “qq” in the peptide sequence corresponds to attachment of the SUMO C-terminal mass remnant, QQTGG, covalently linked to the lysine residue via its C-terminal glycine residue.



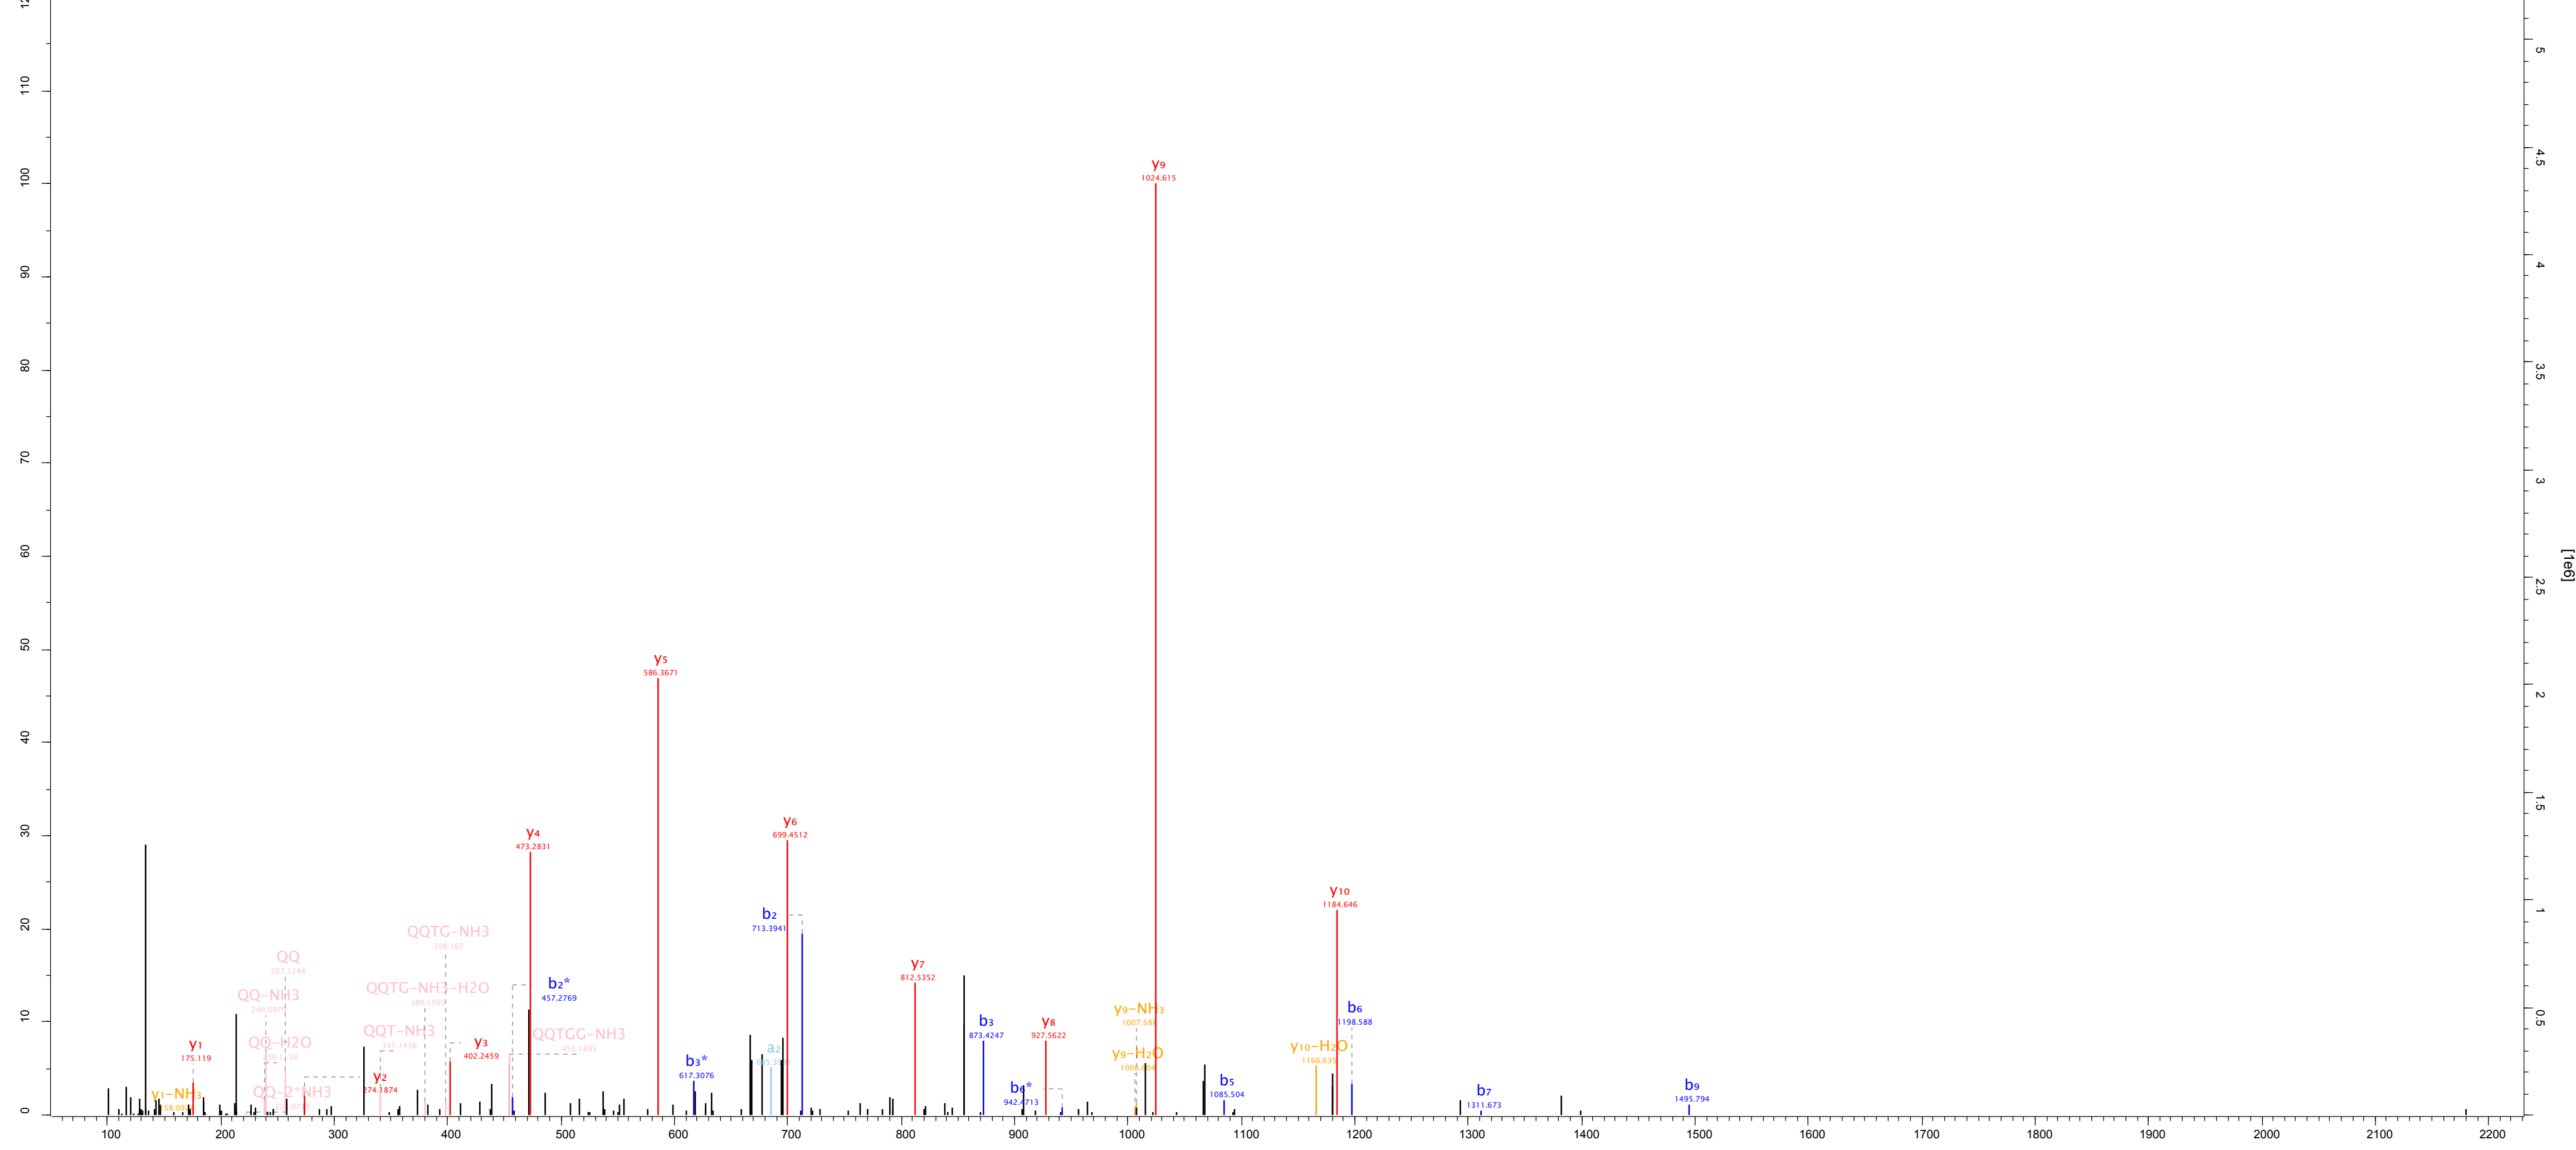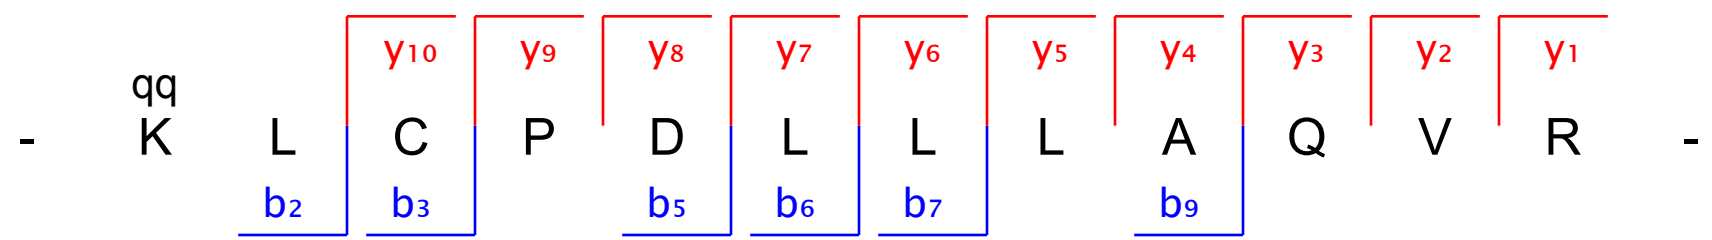

Standard: POLH-K70-SUMO

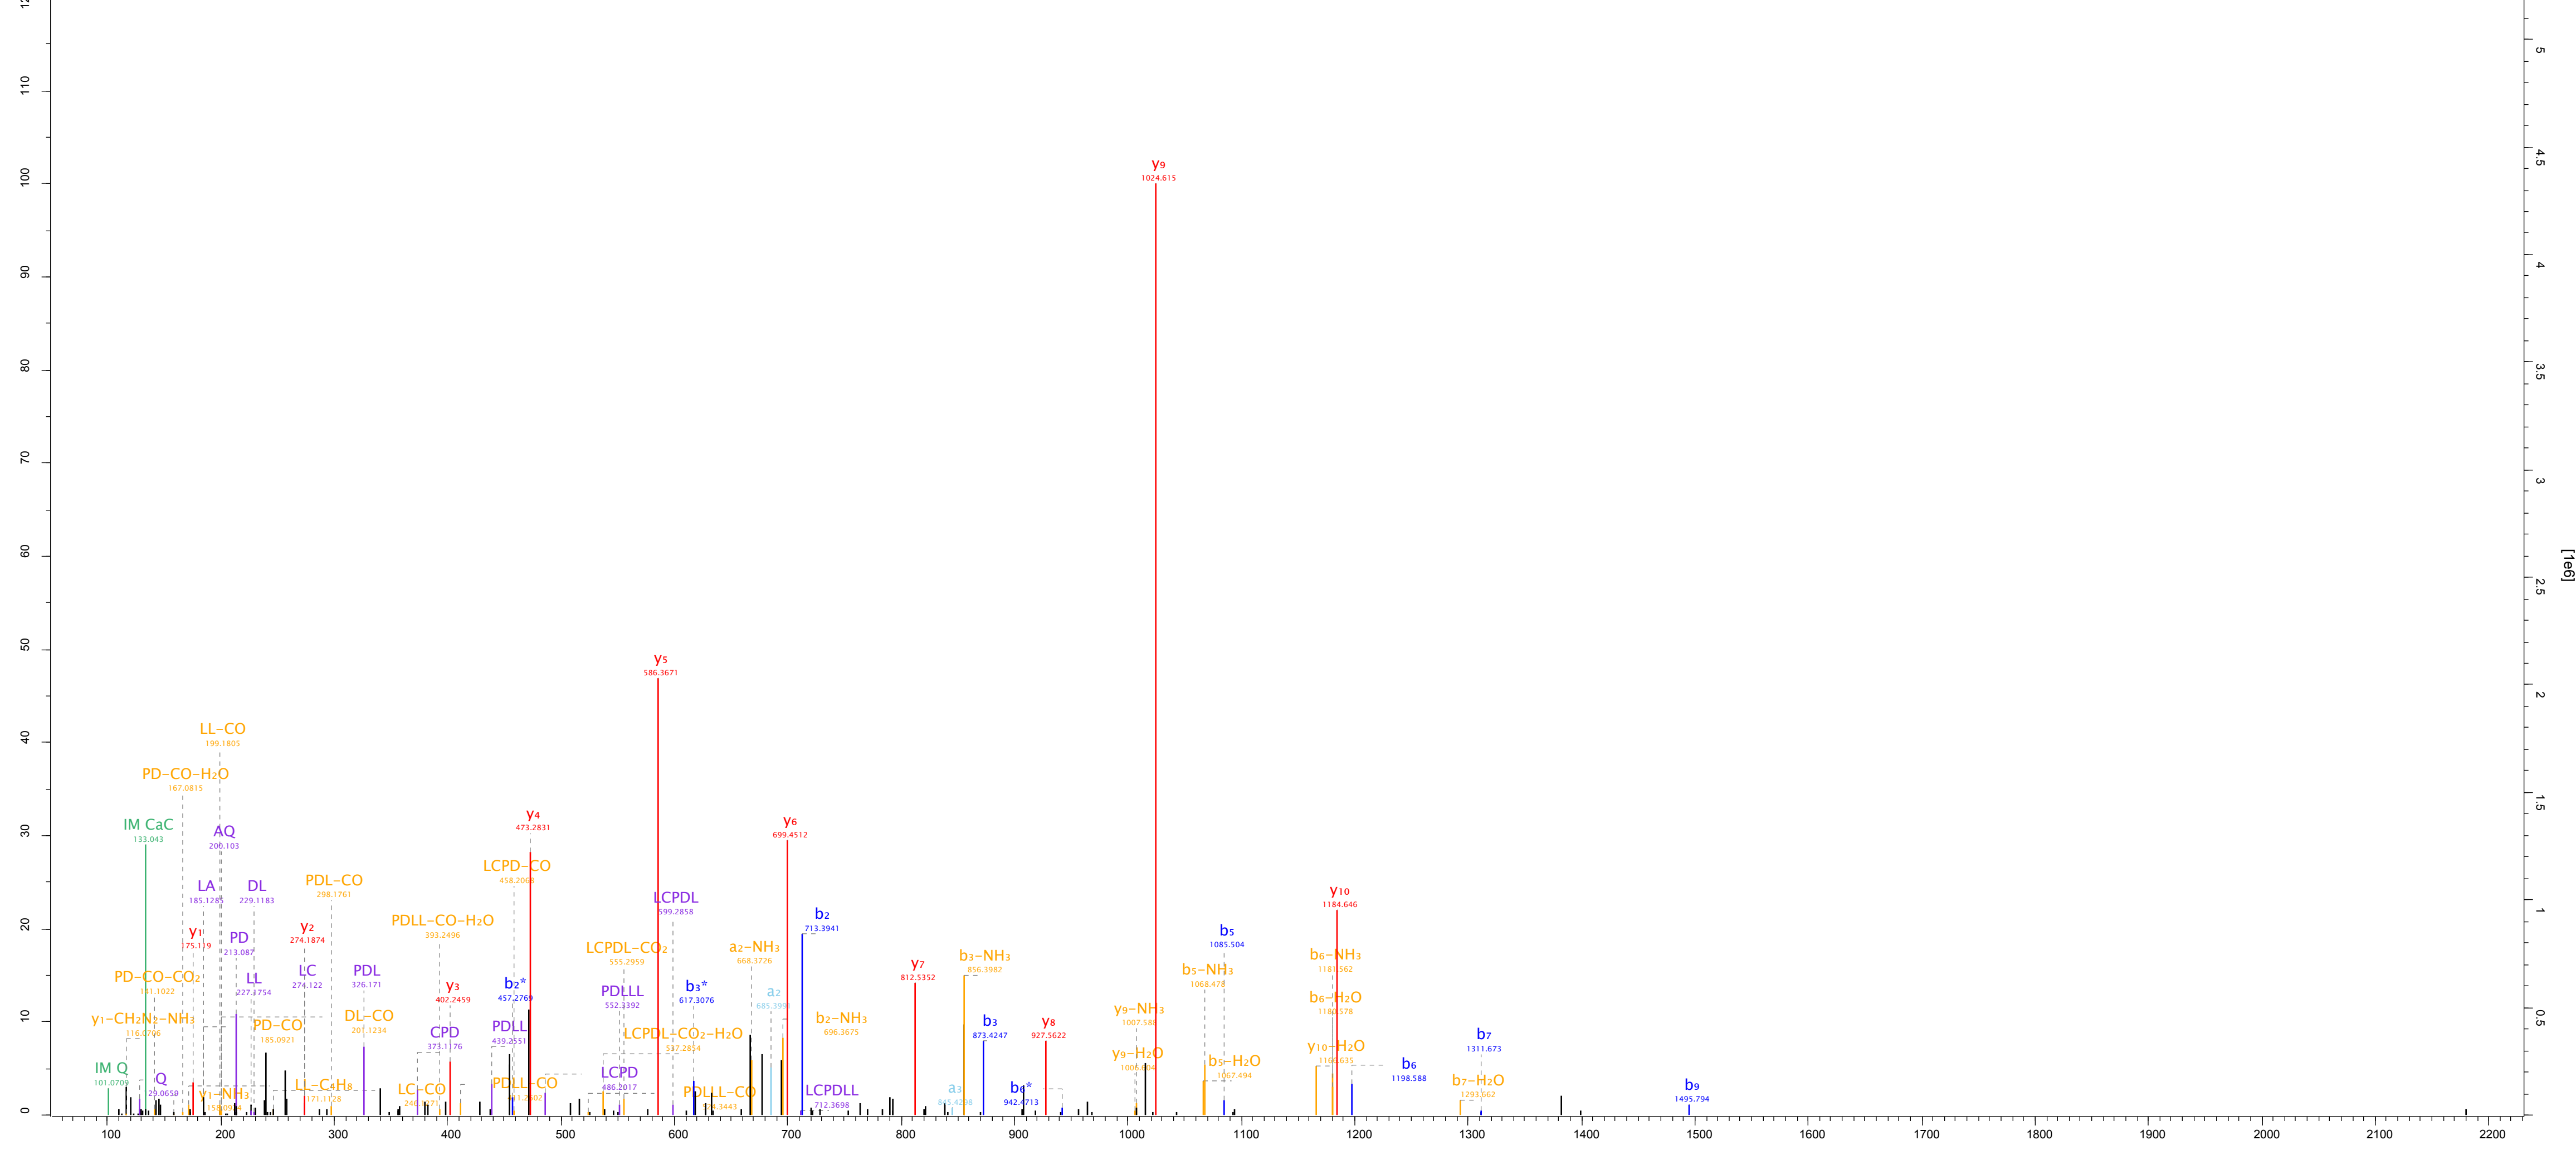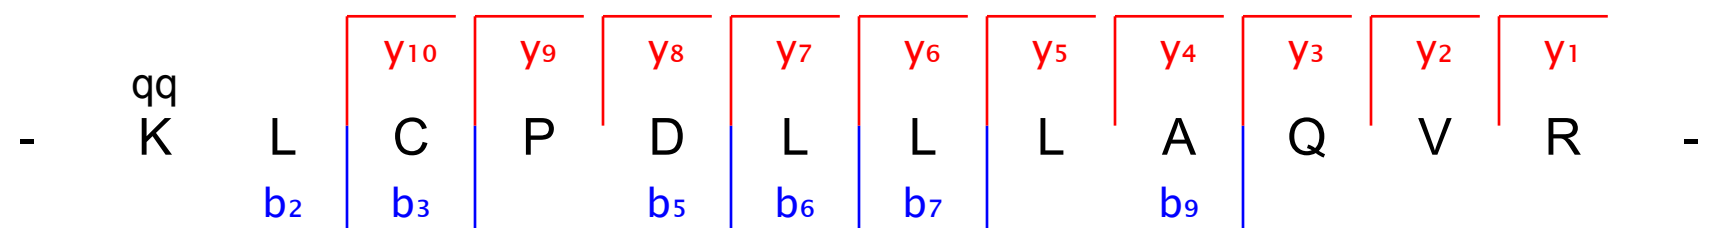

Advanced: POLH-K70-SUMO

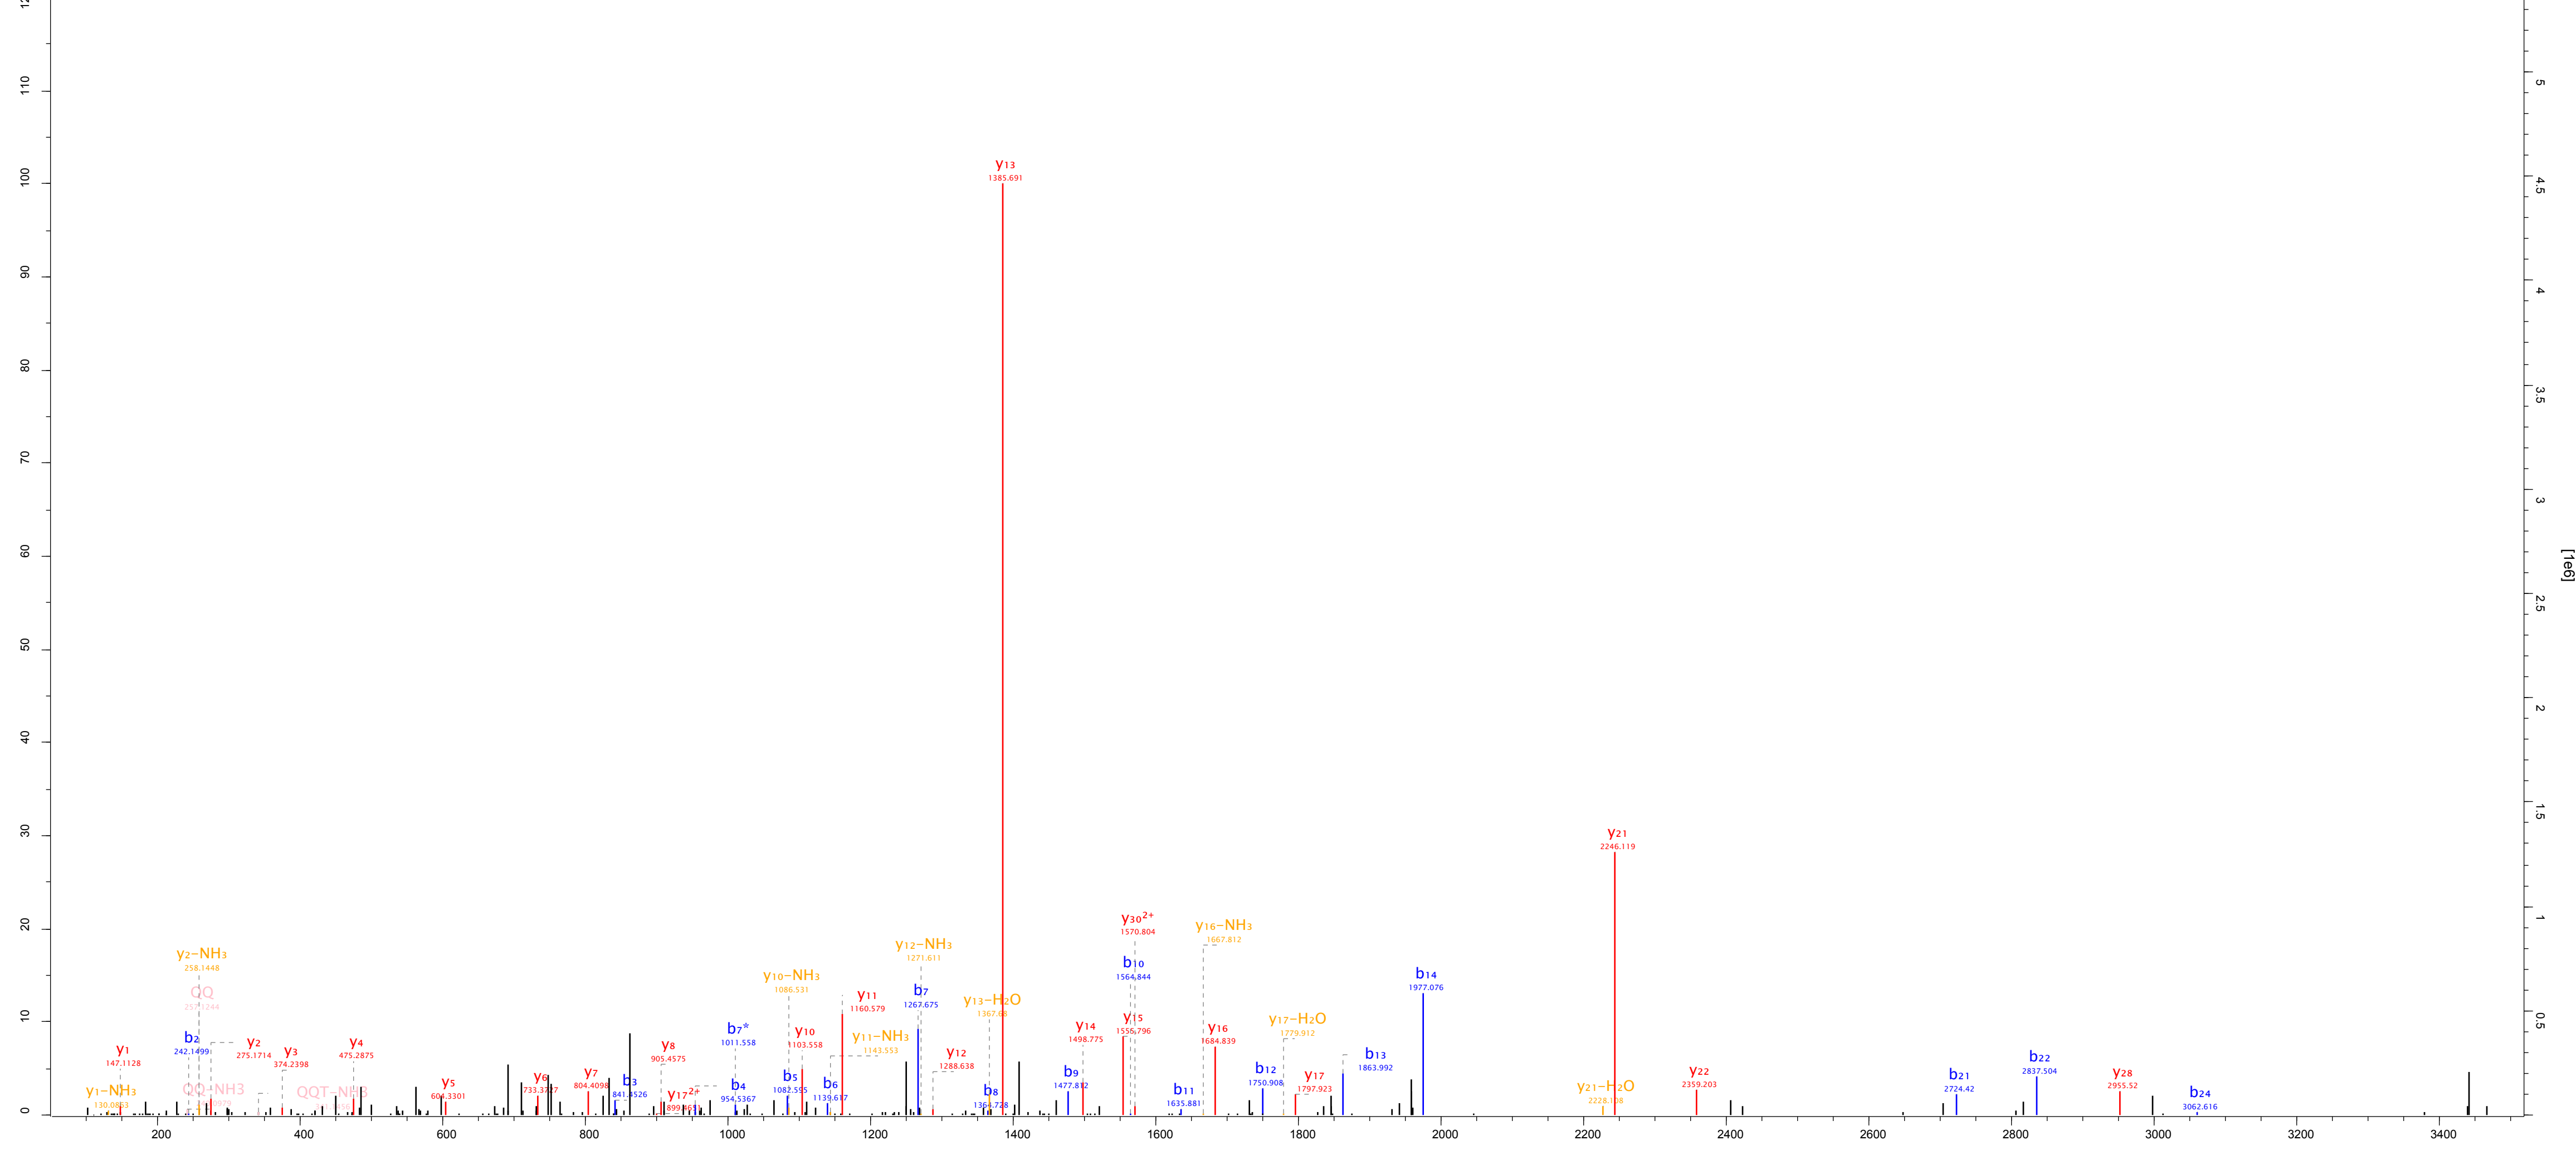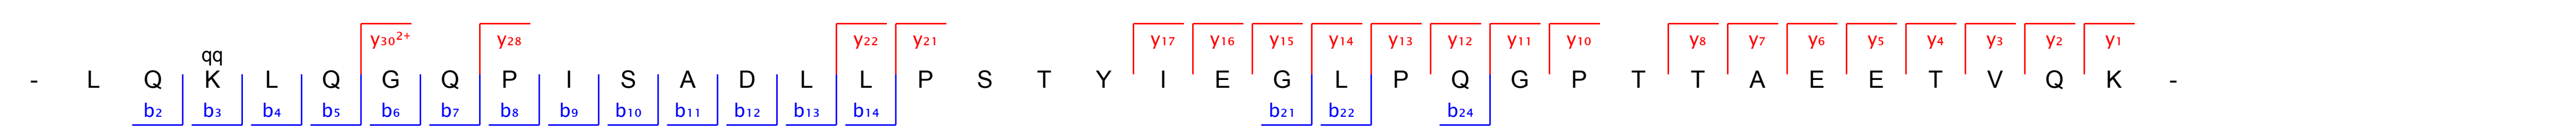

Standard: POLH-K131-SUMO

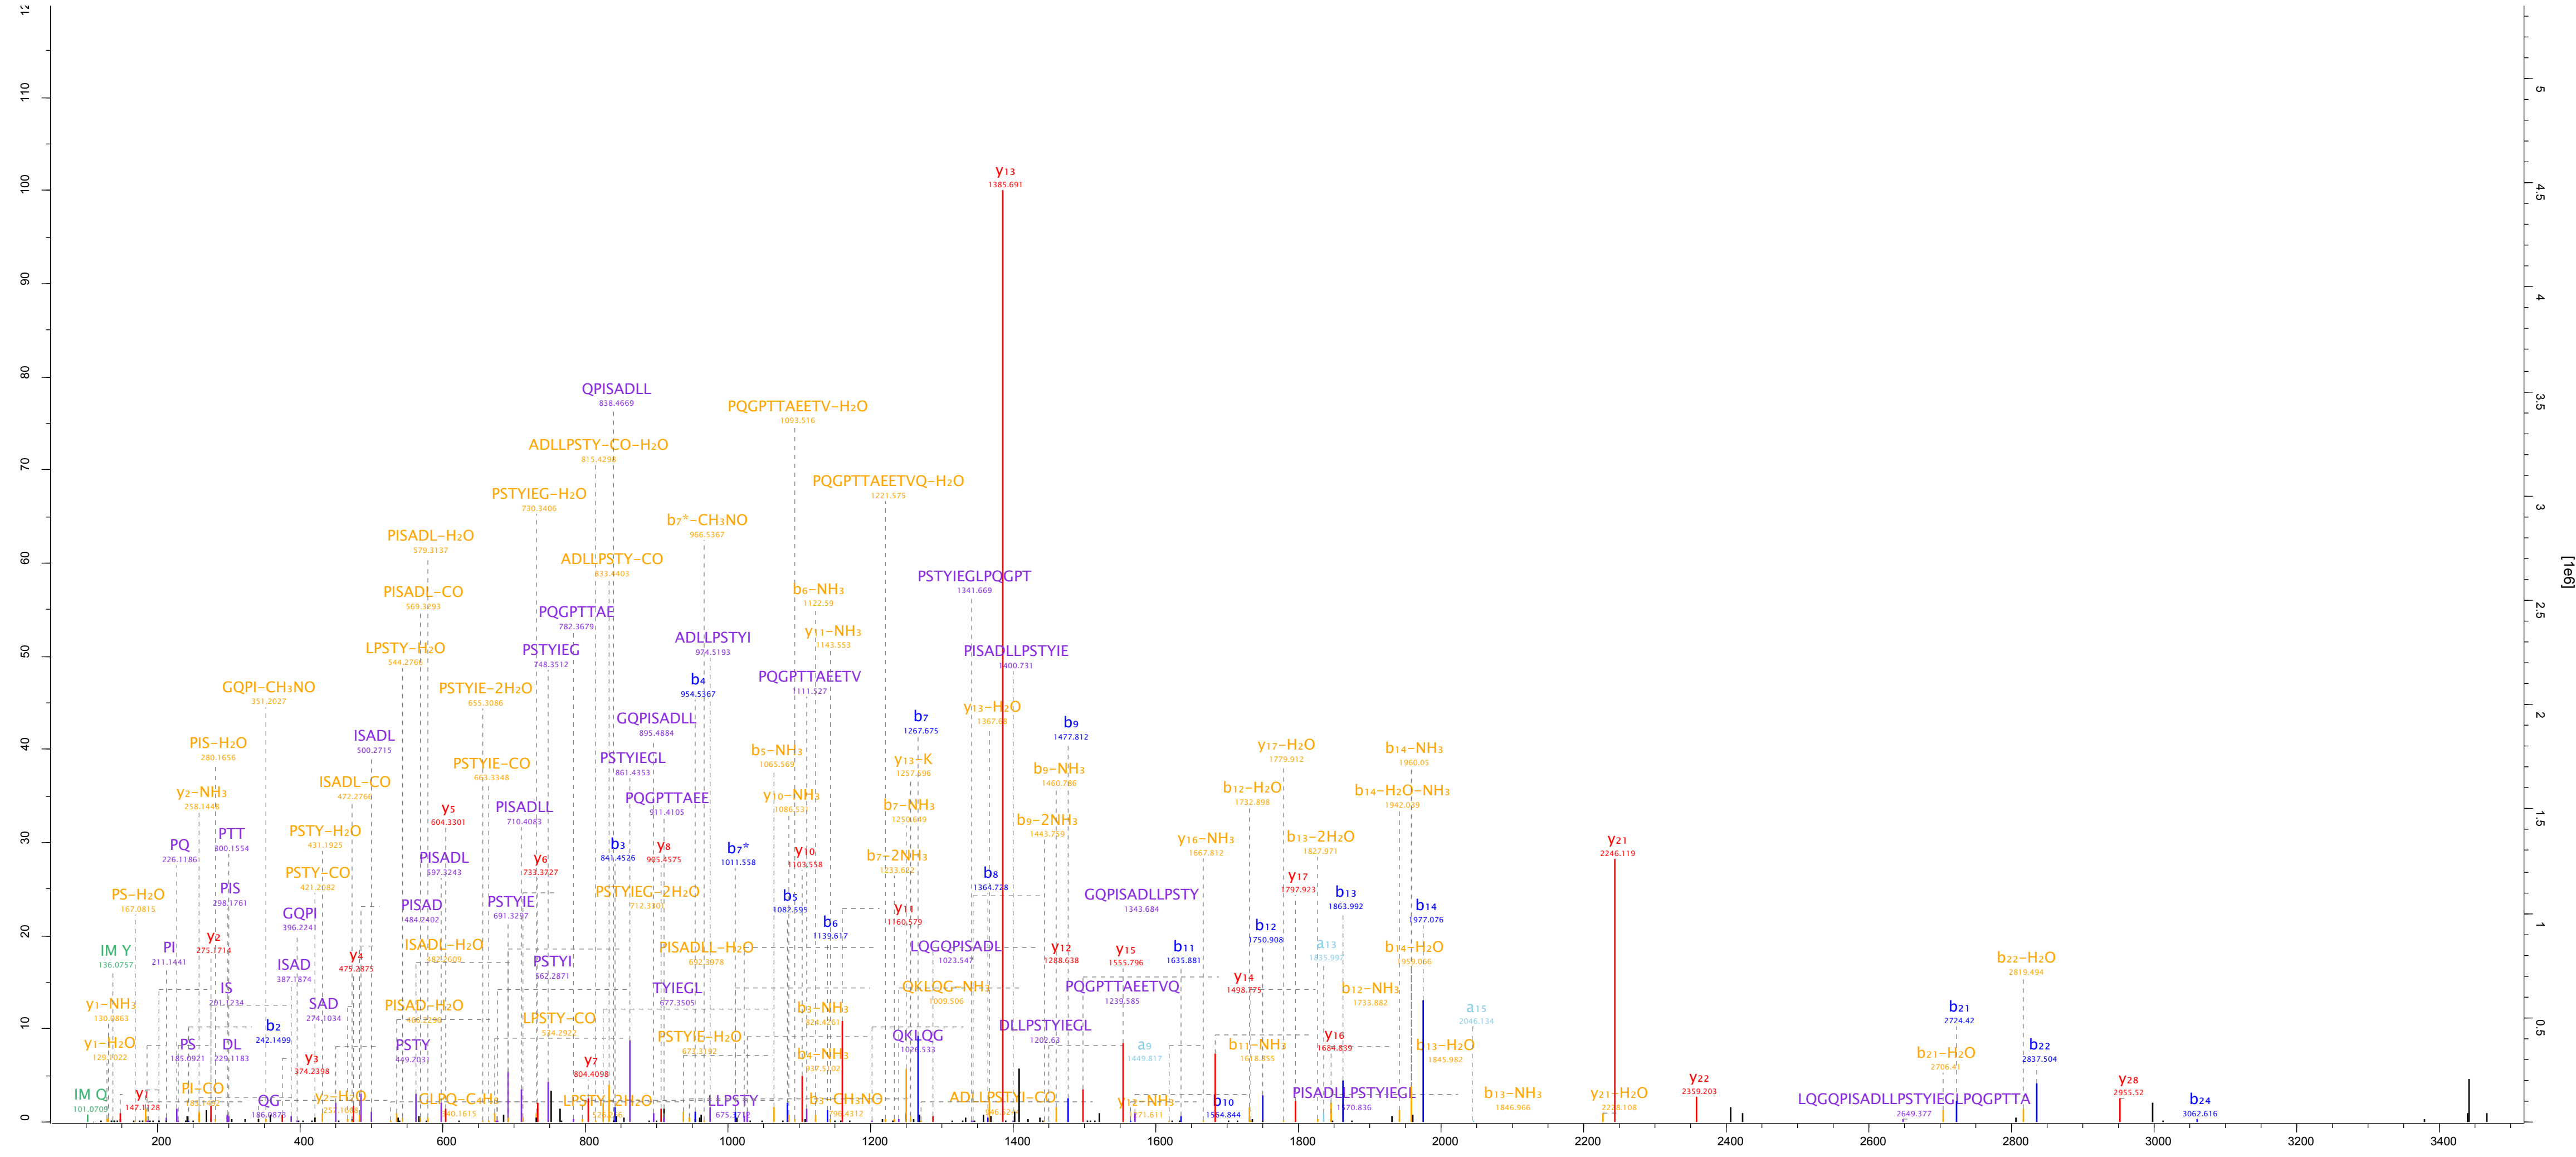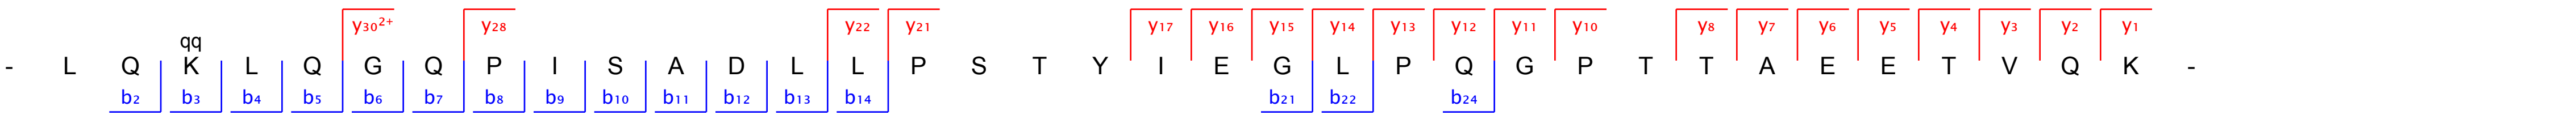

Advanced: POLH-K131-SUMO

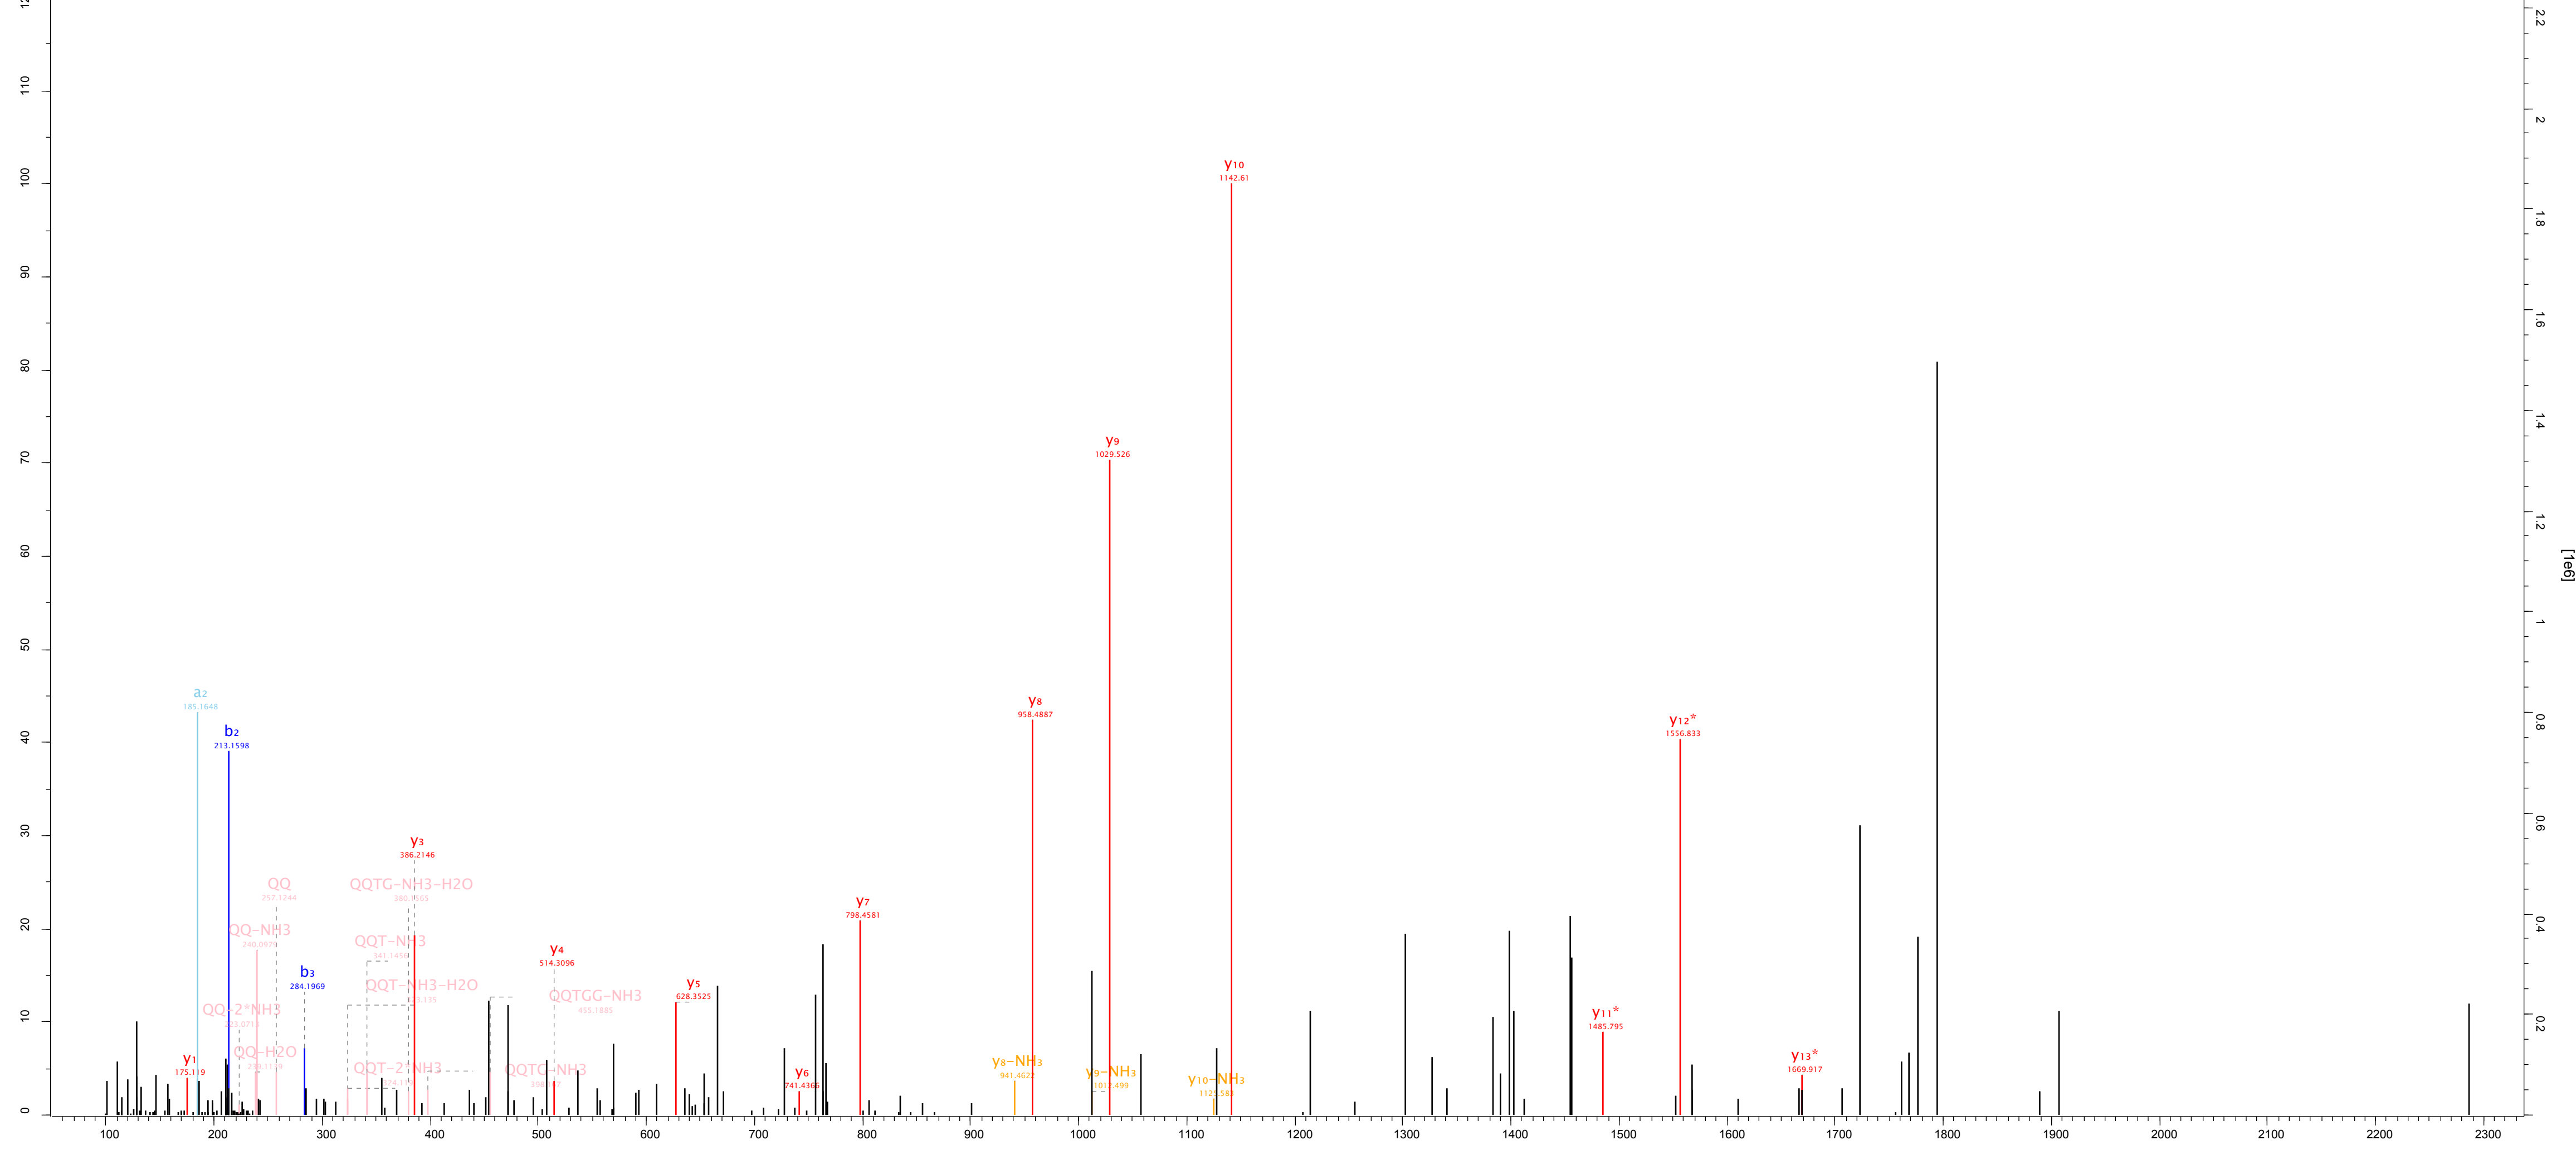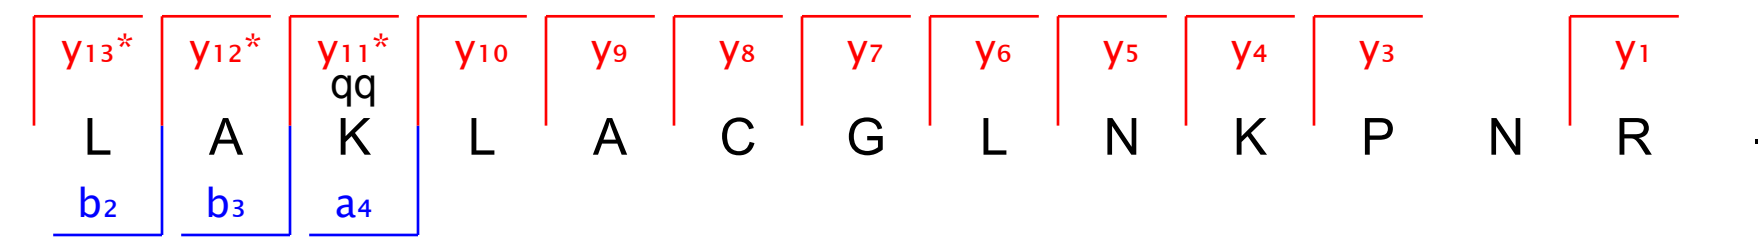

Standard: POLH-K224-SUMO

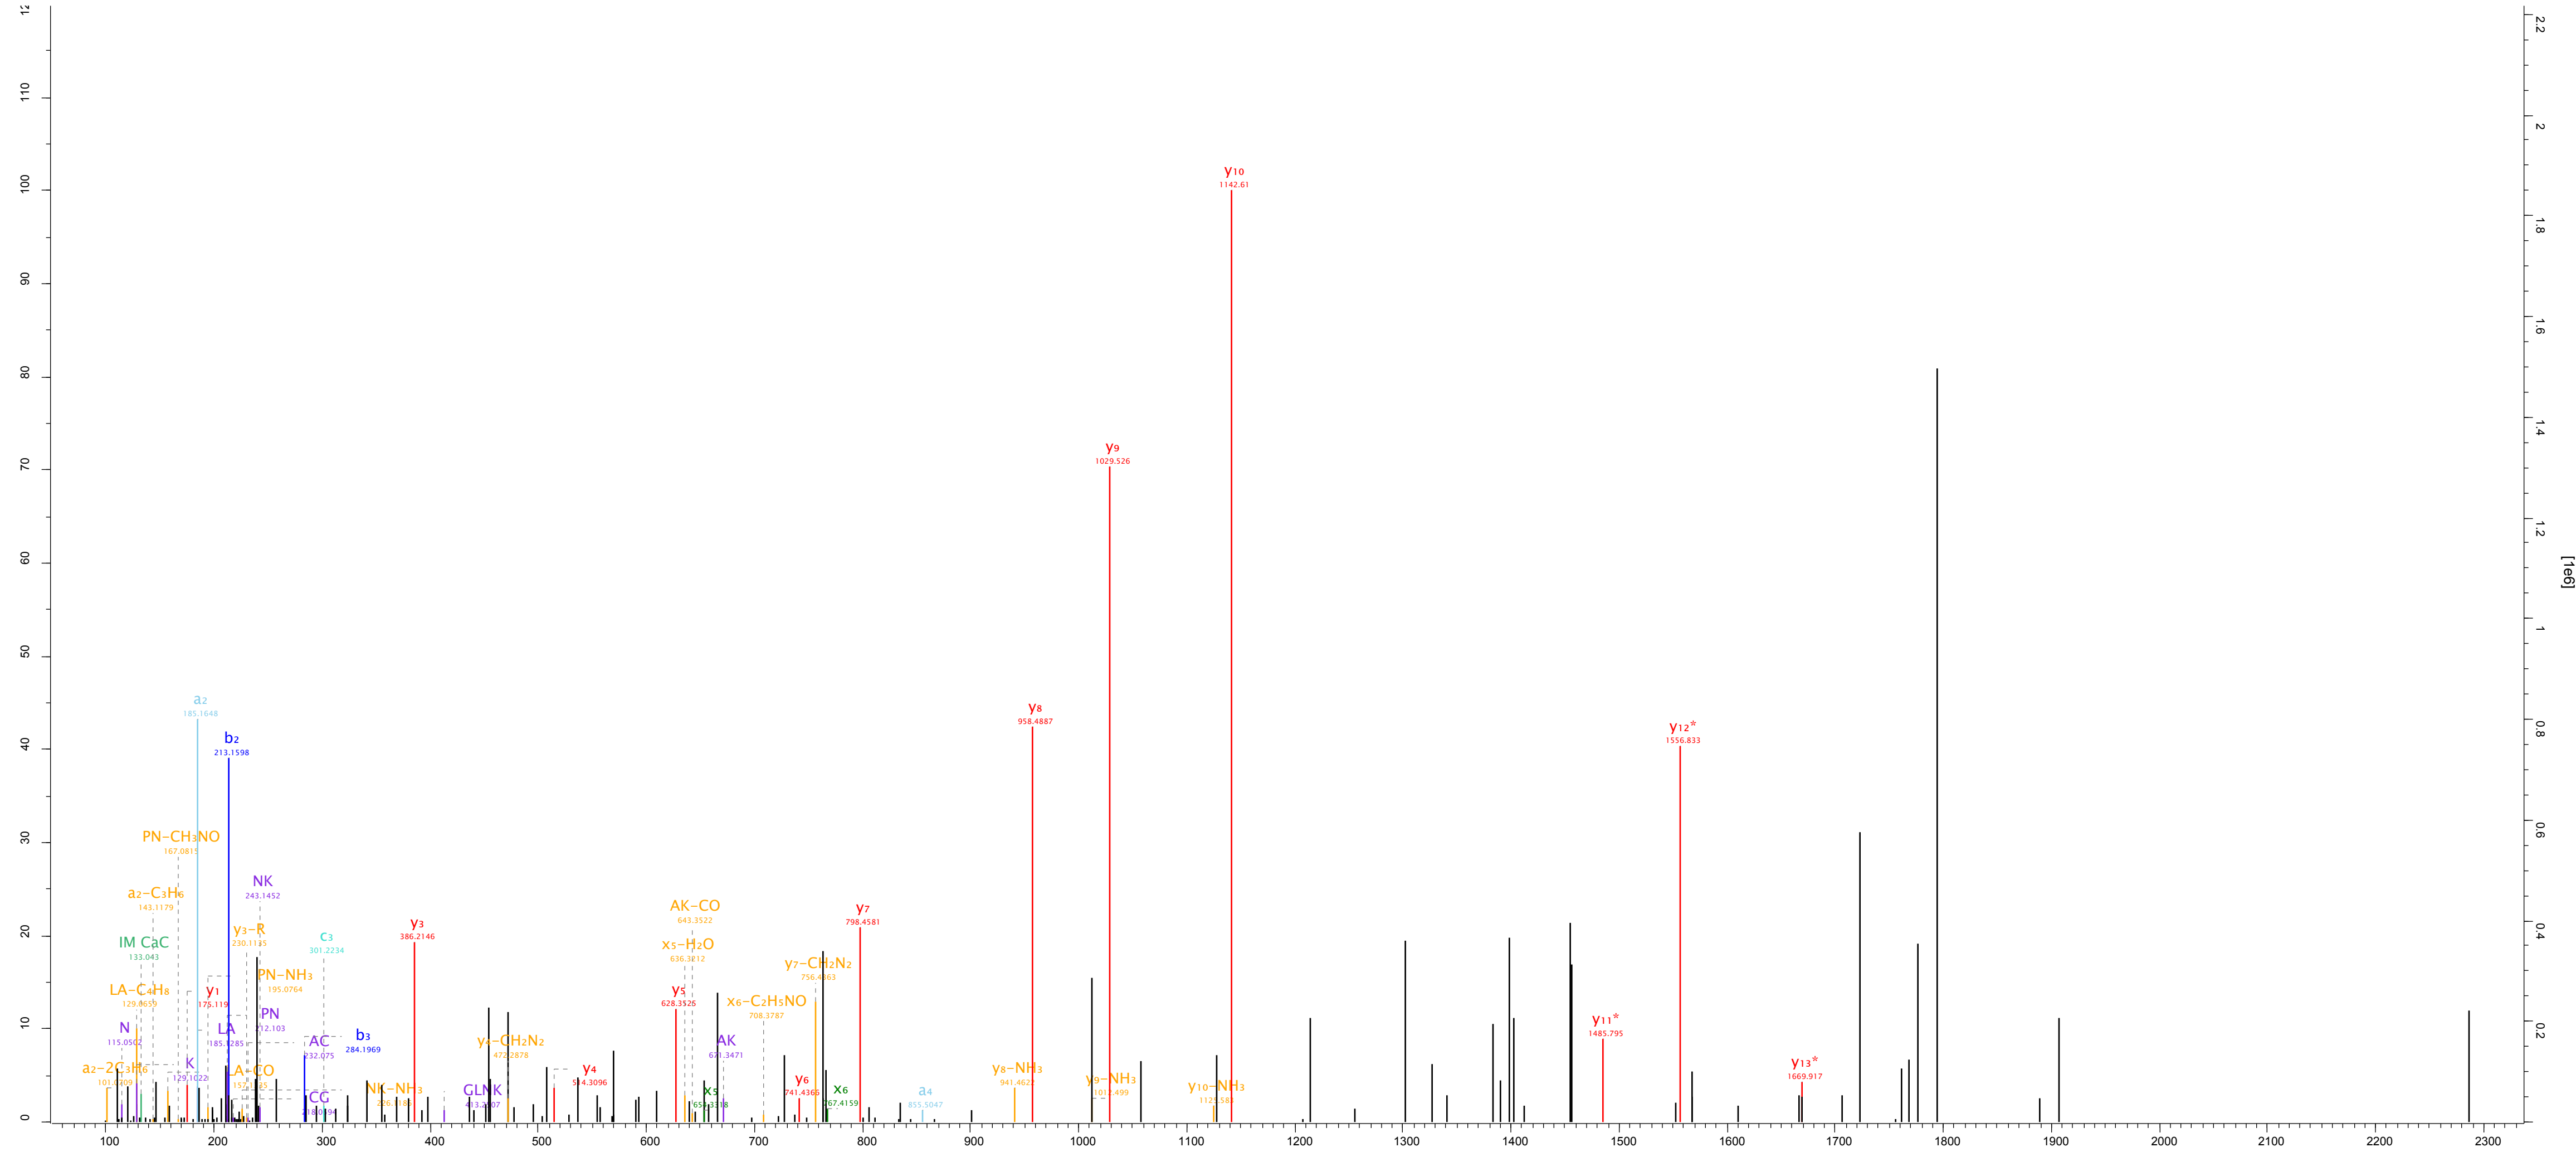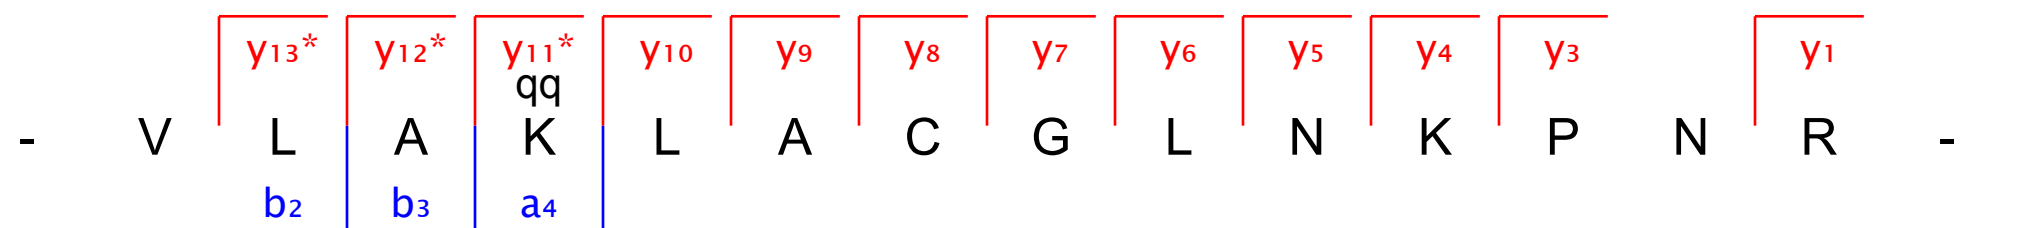

Advanced: POLH-K224-SUMO

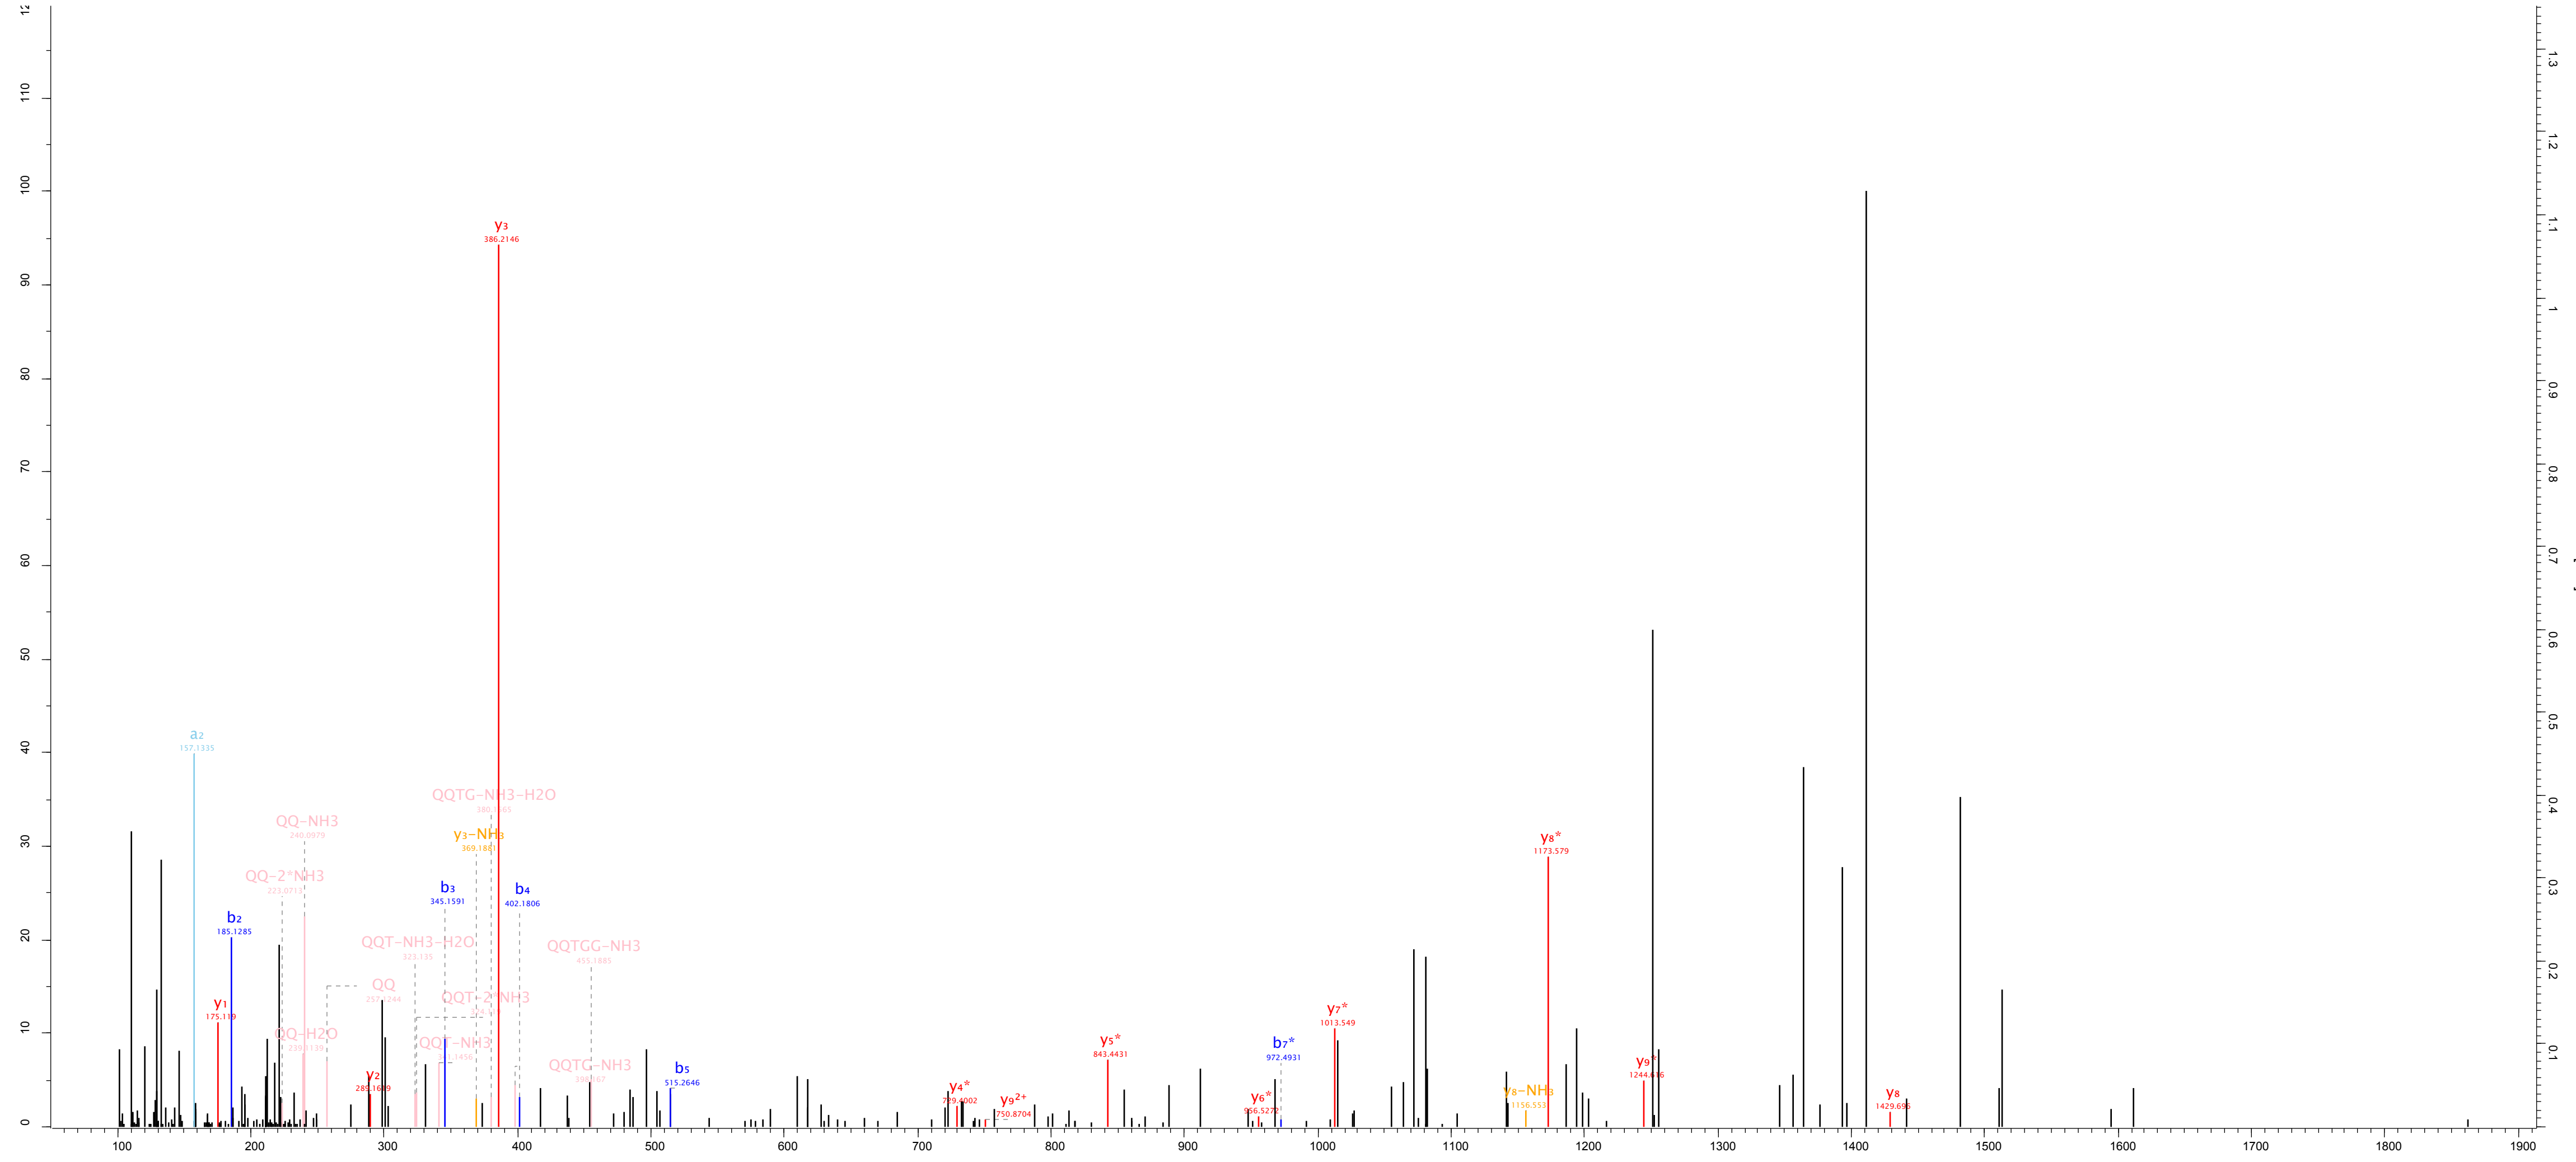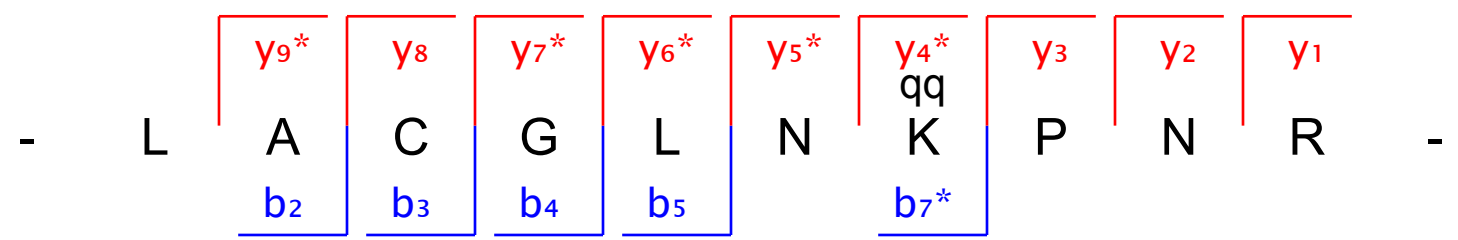

Standard: POLH-K231-SUMO

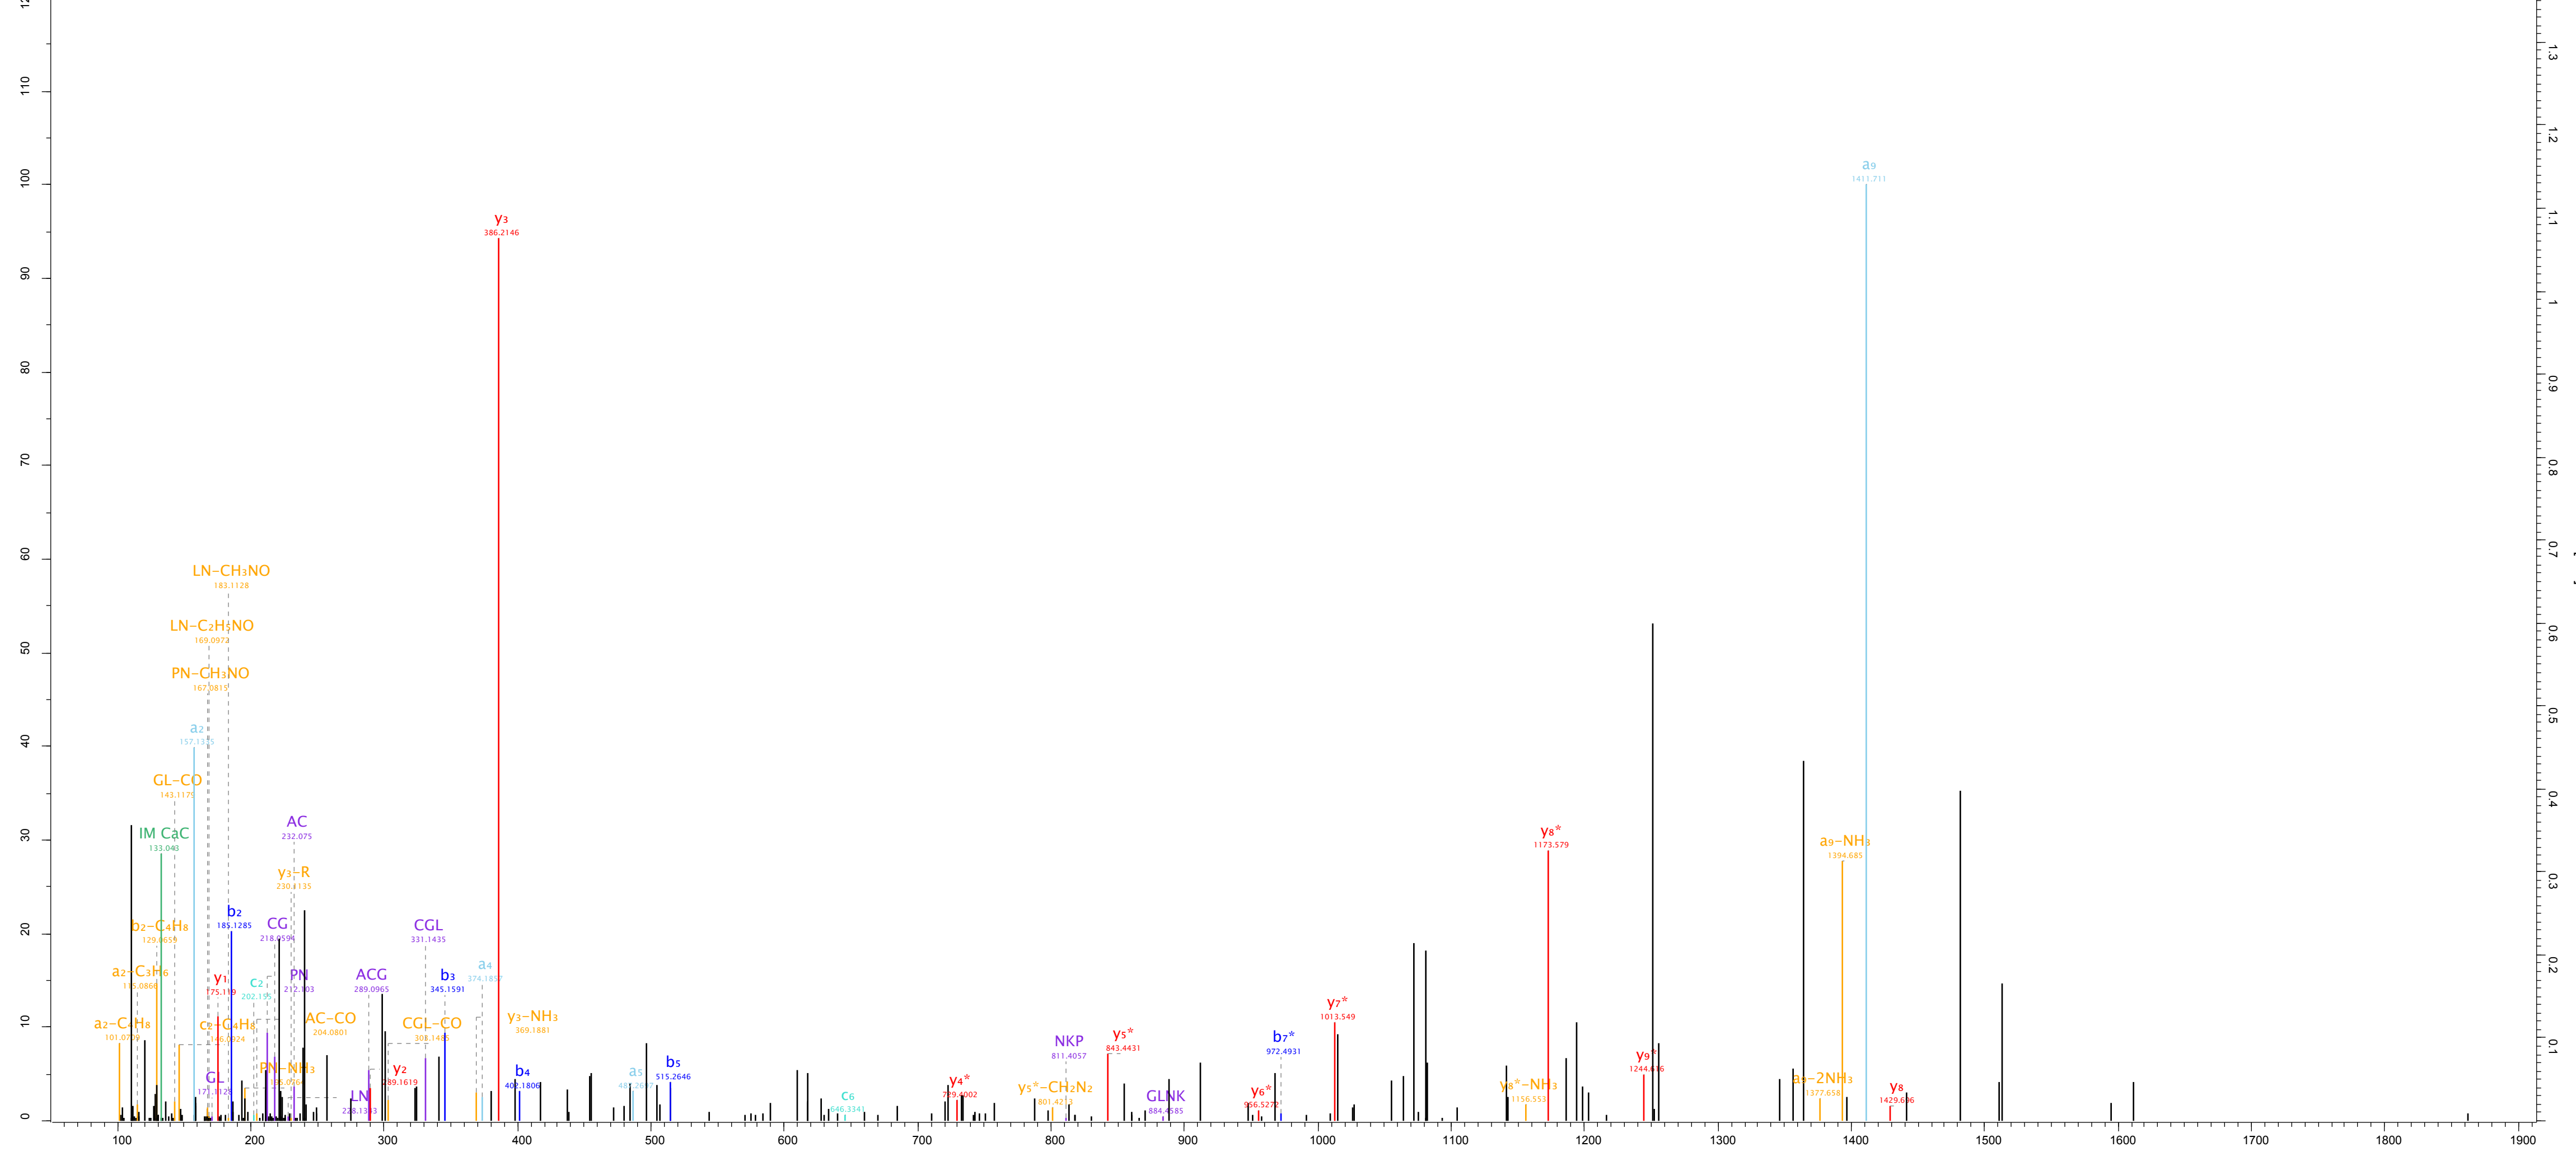

Advanced: POLH-K231-SUMO



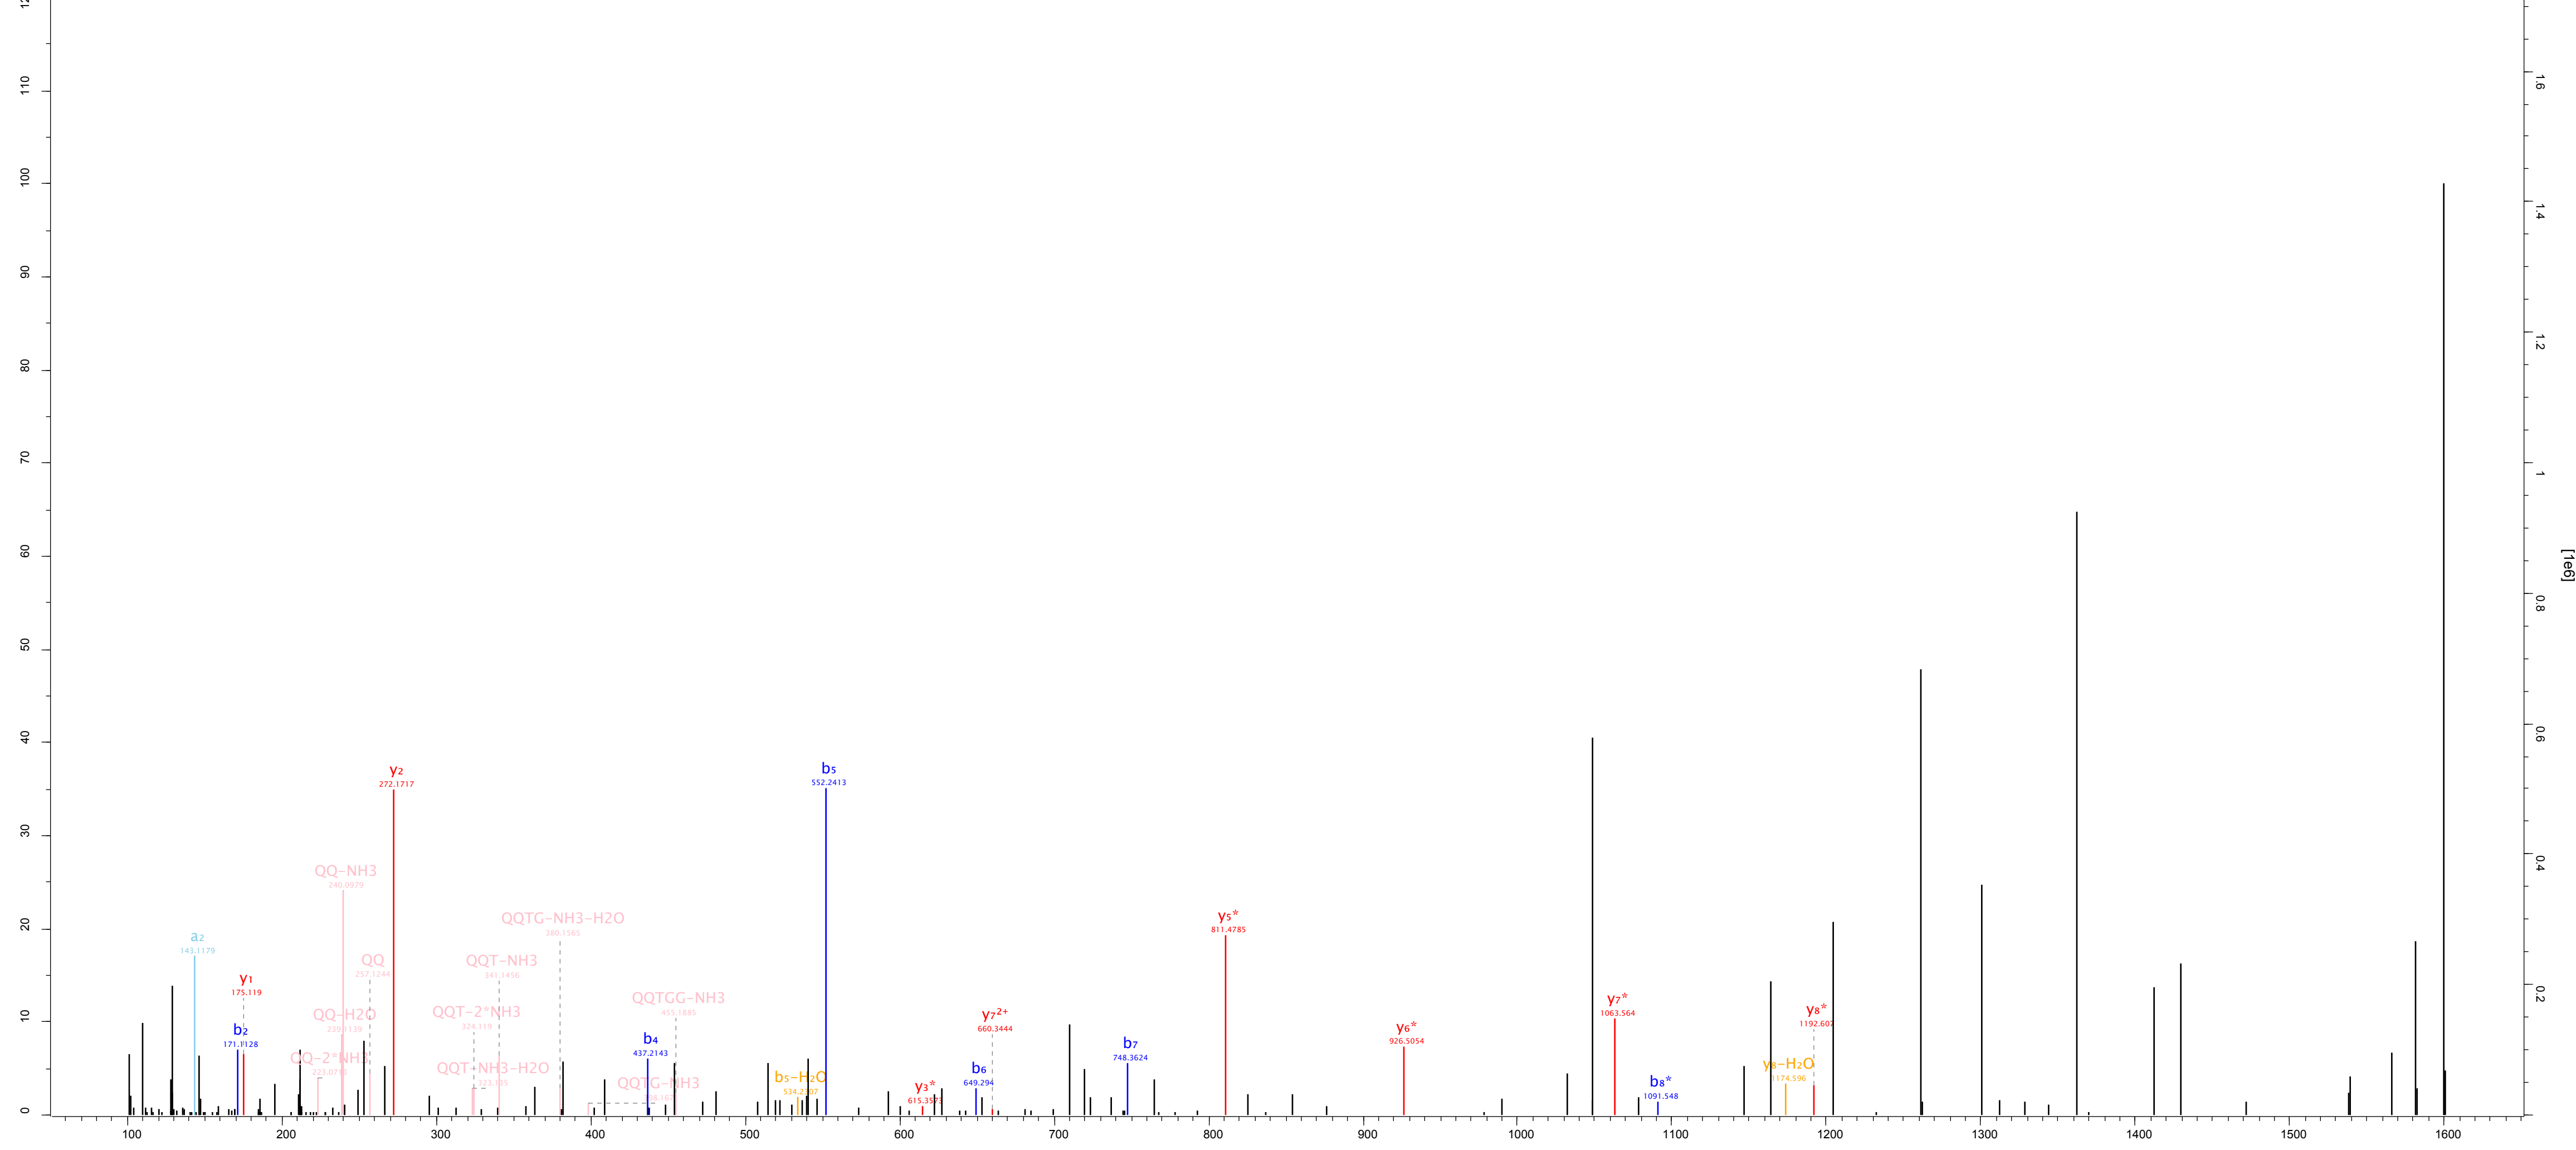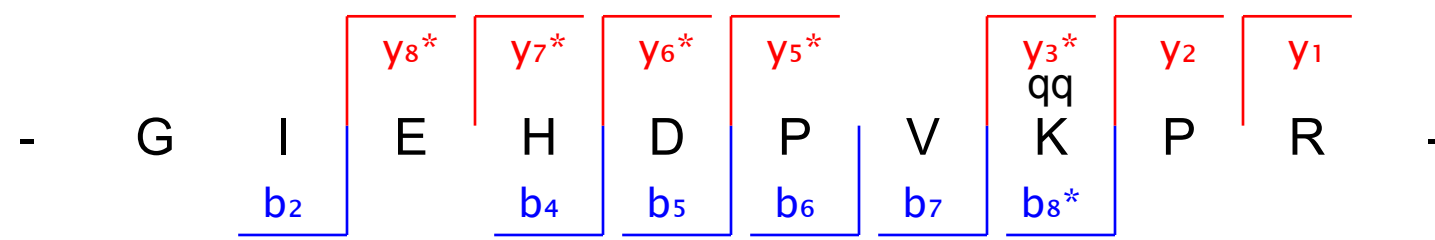

Standard: POLH-K311-SUMO

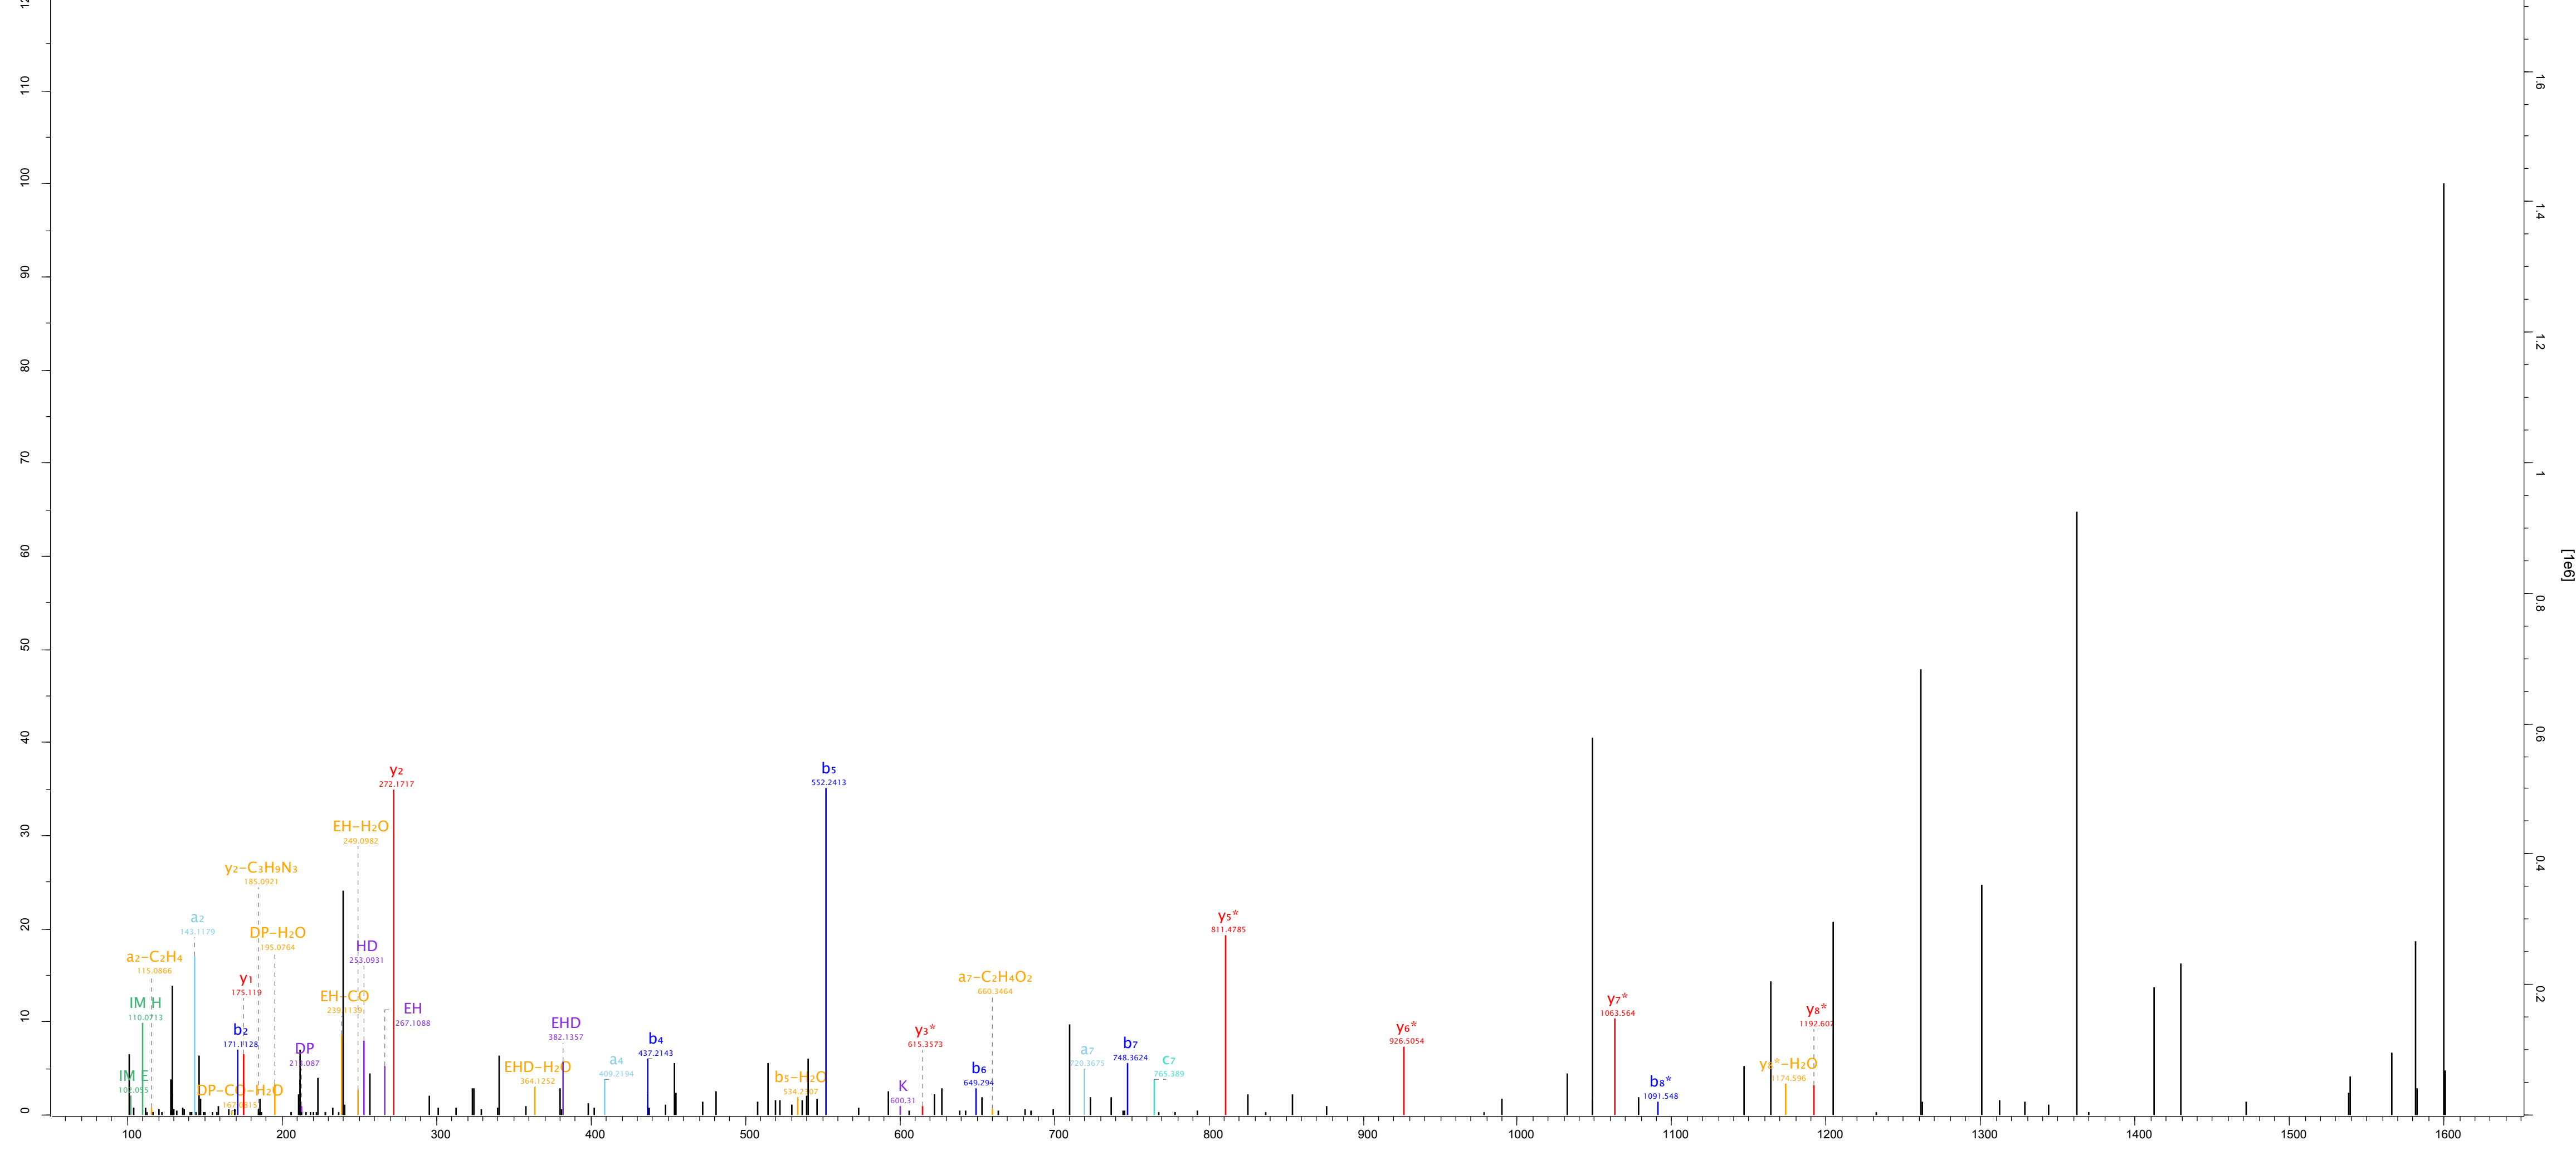

Advanced: POLH-K311-SUMO

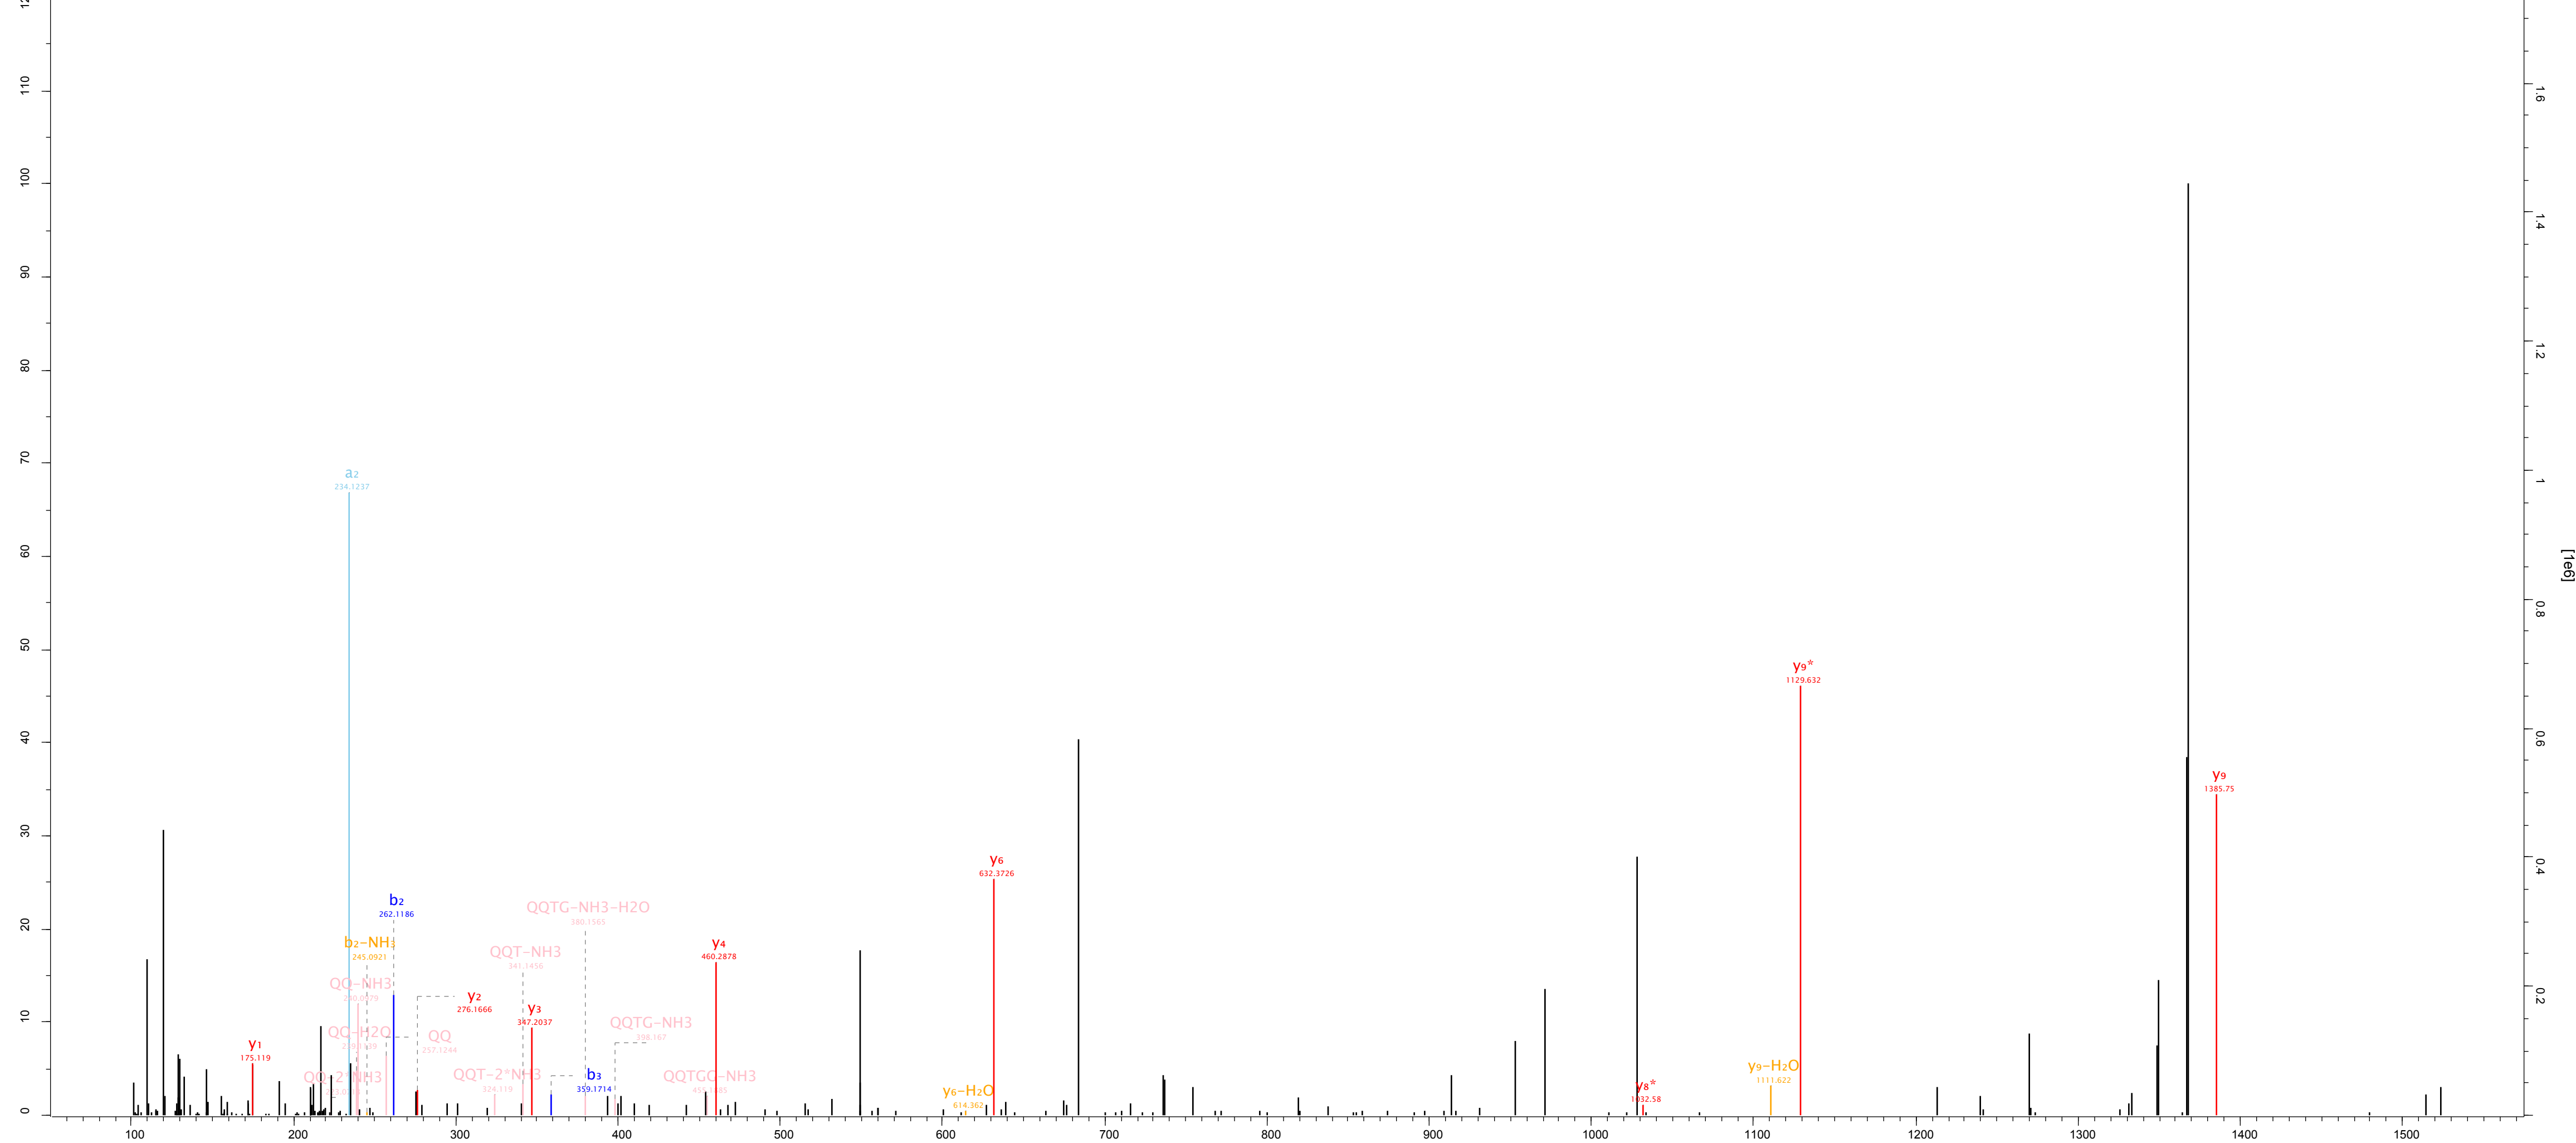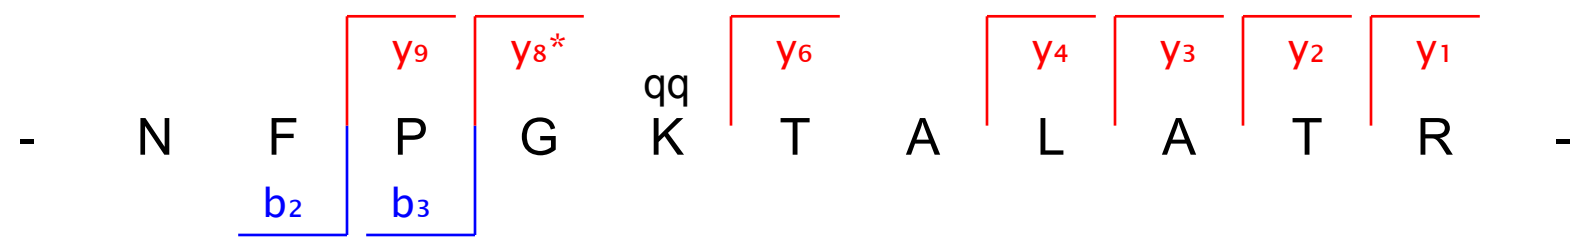

Standard: POLH-K328-SUMO

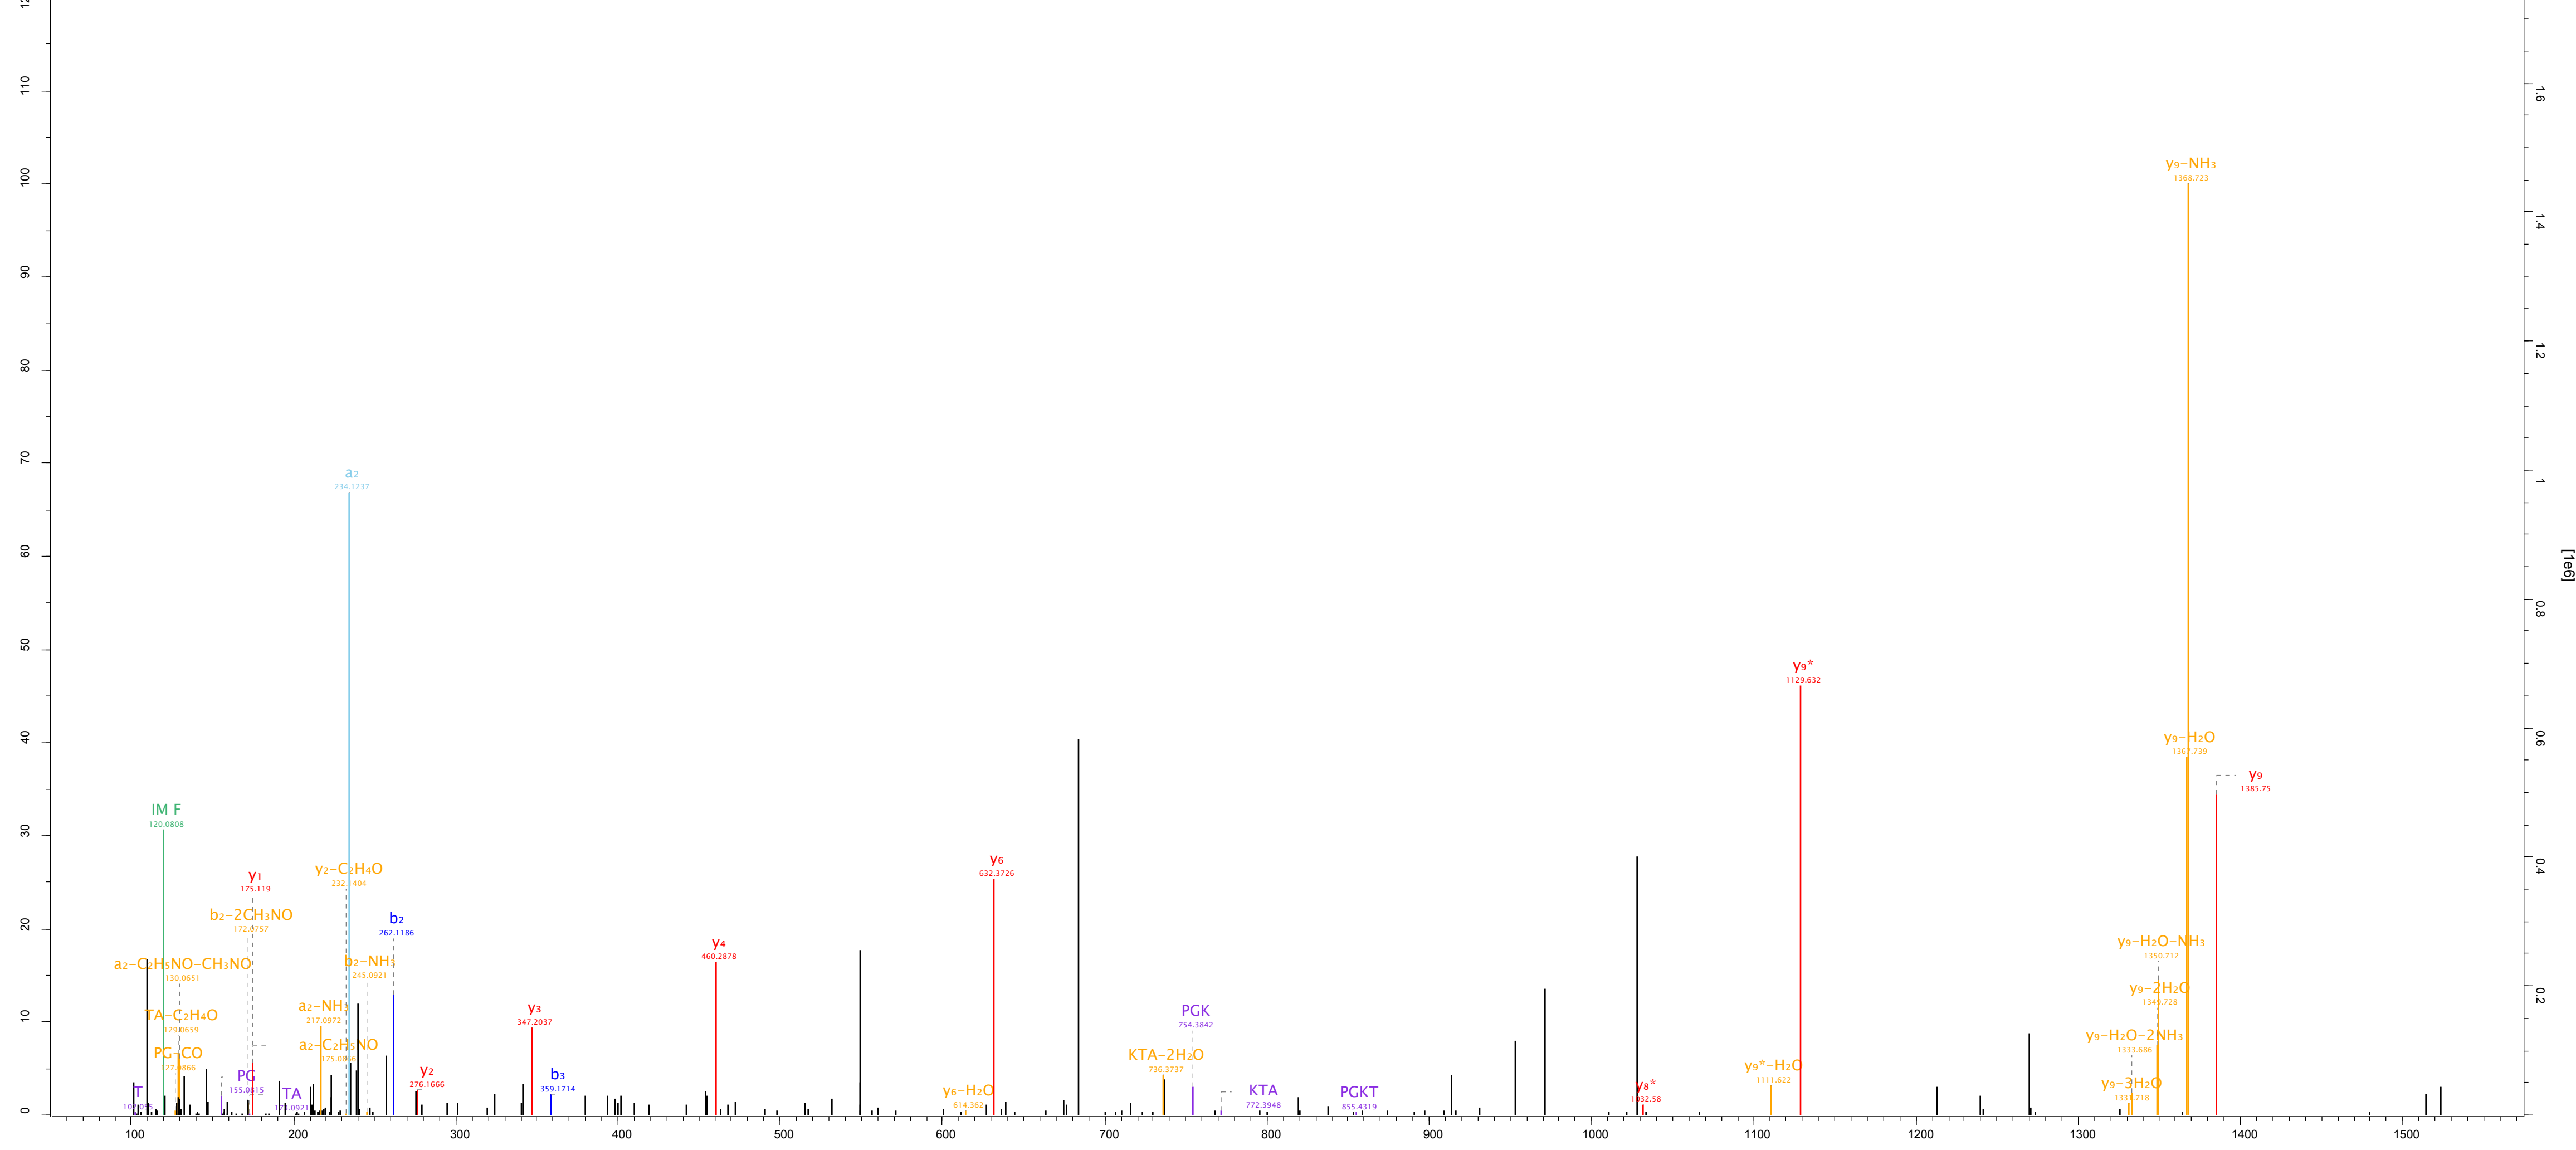

Advanced: POLH-K328-SUMO

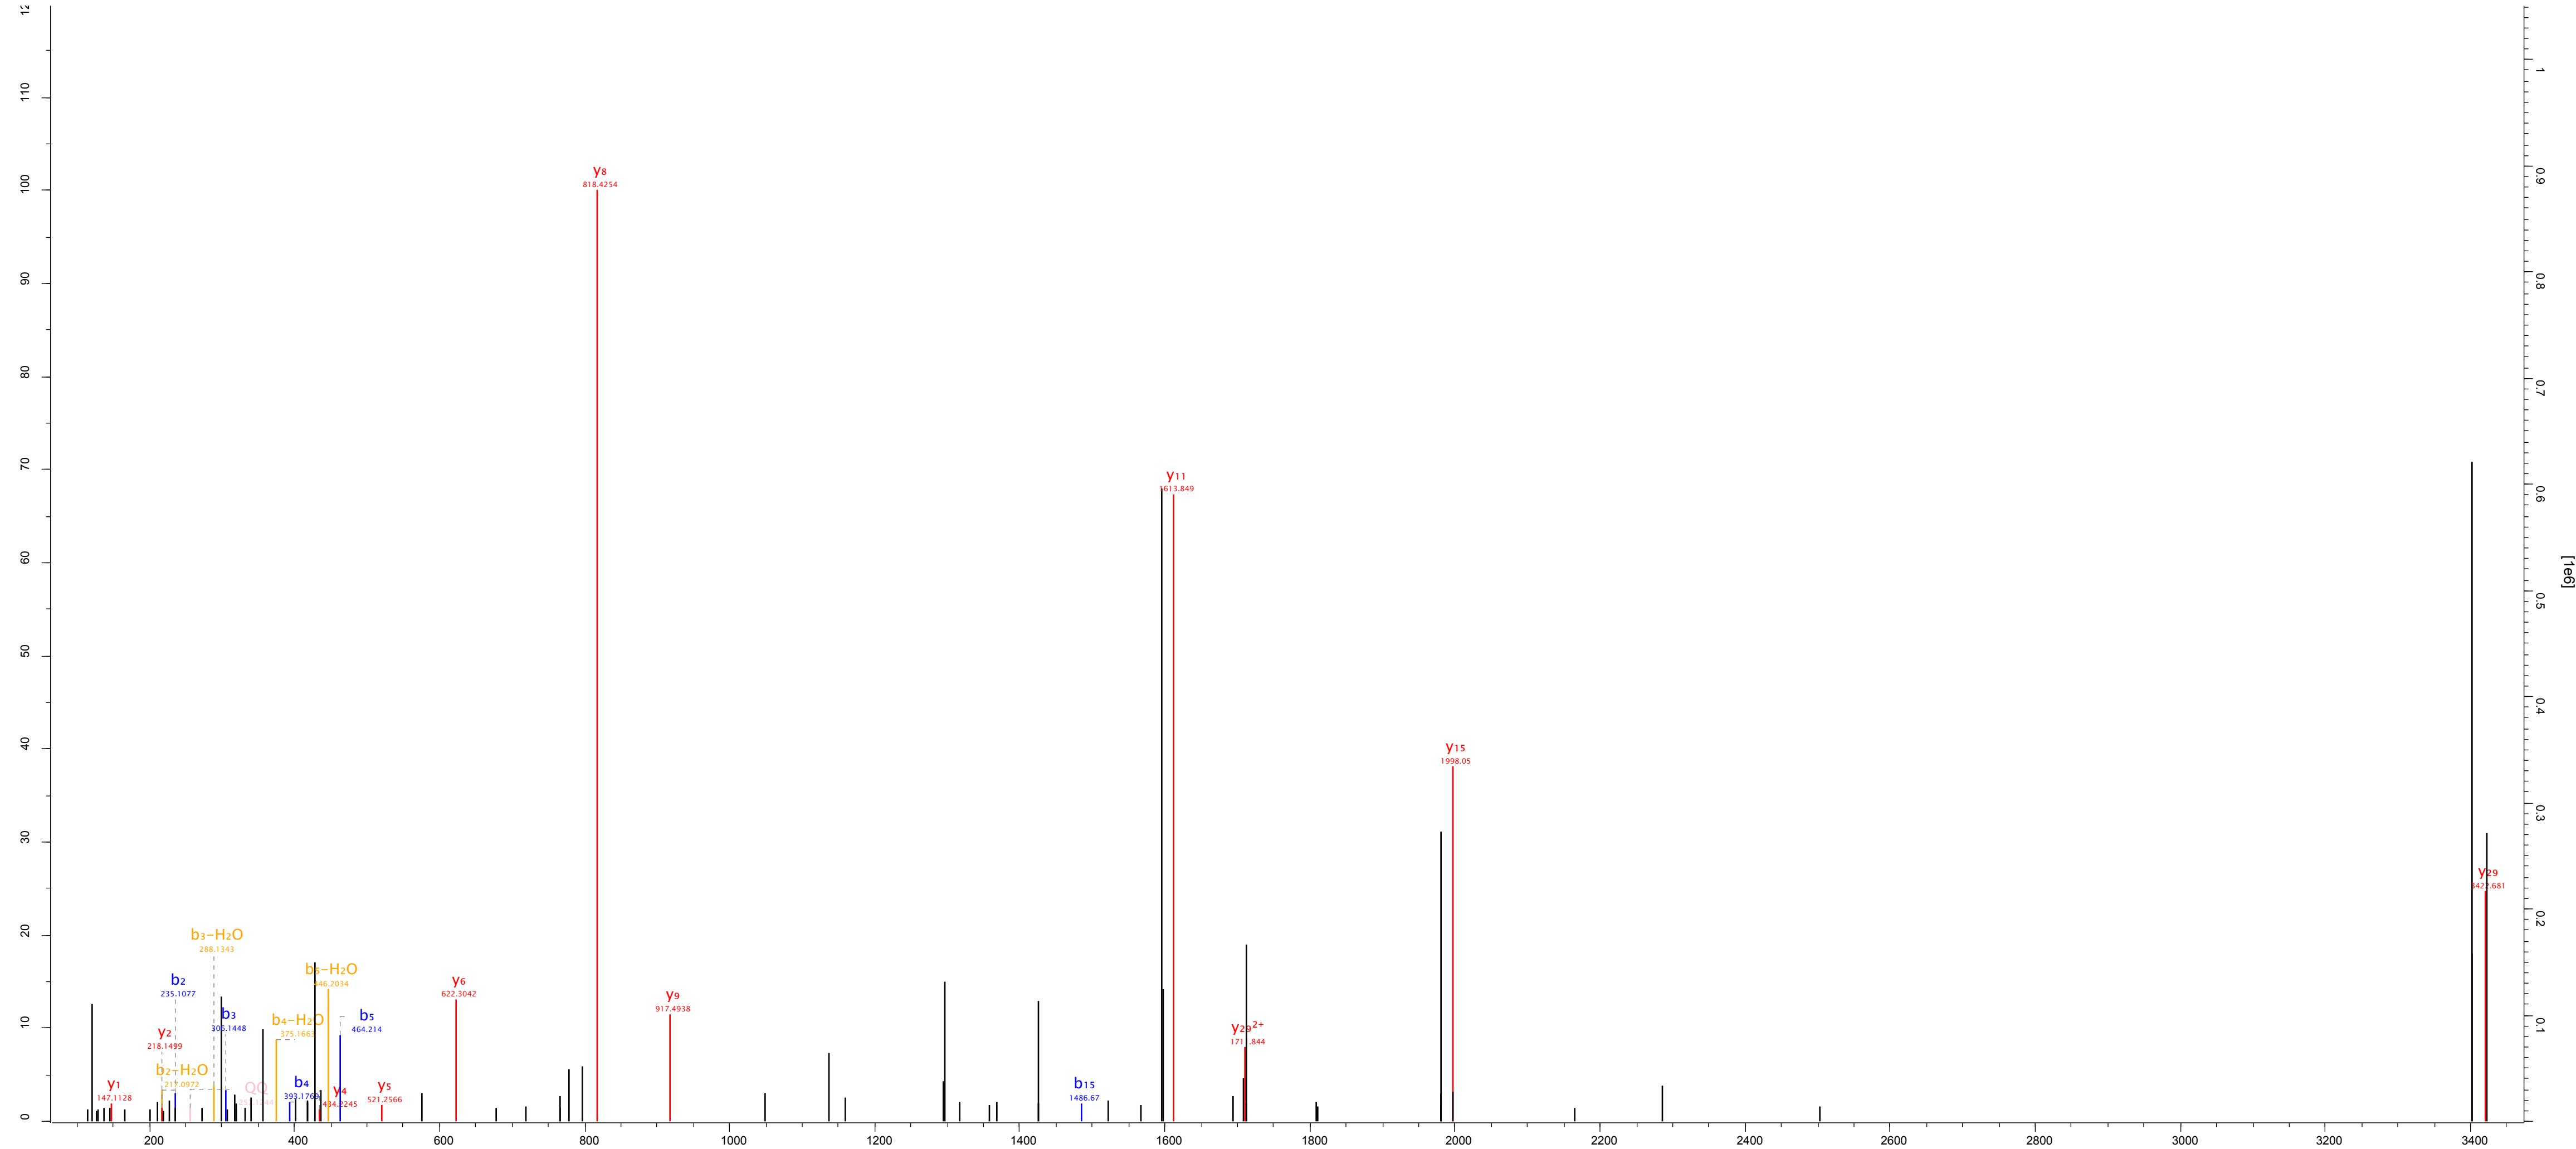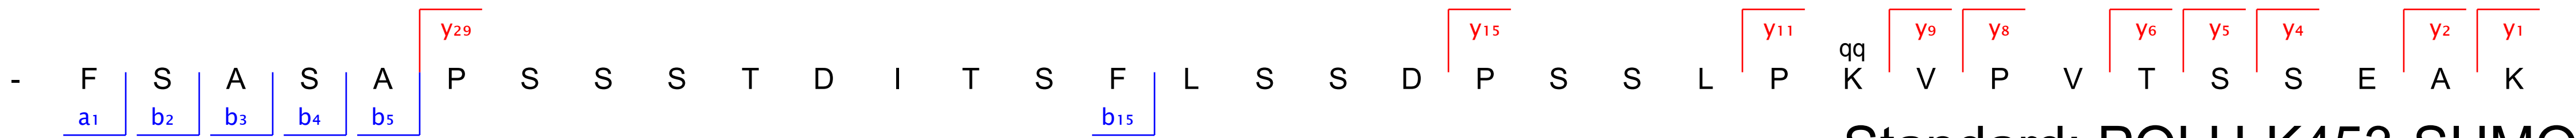

Standard: POLH-K453-SUMO

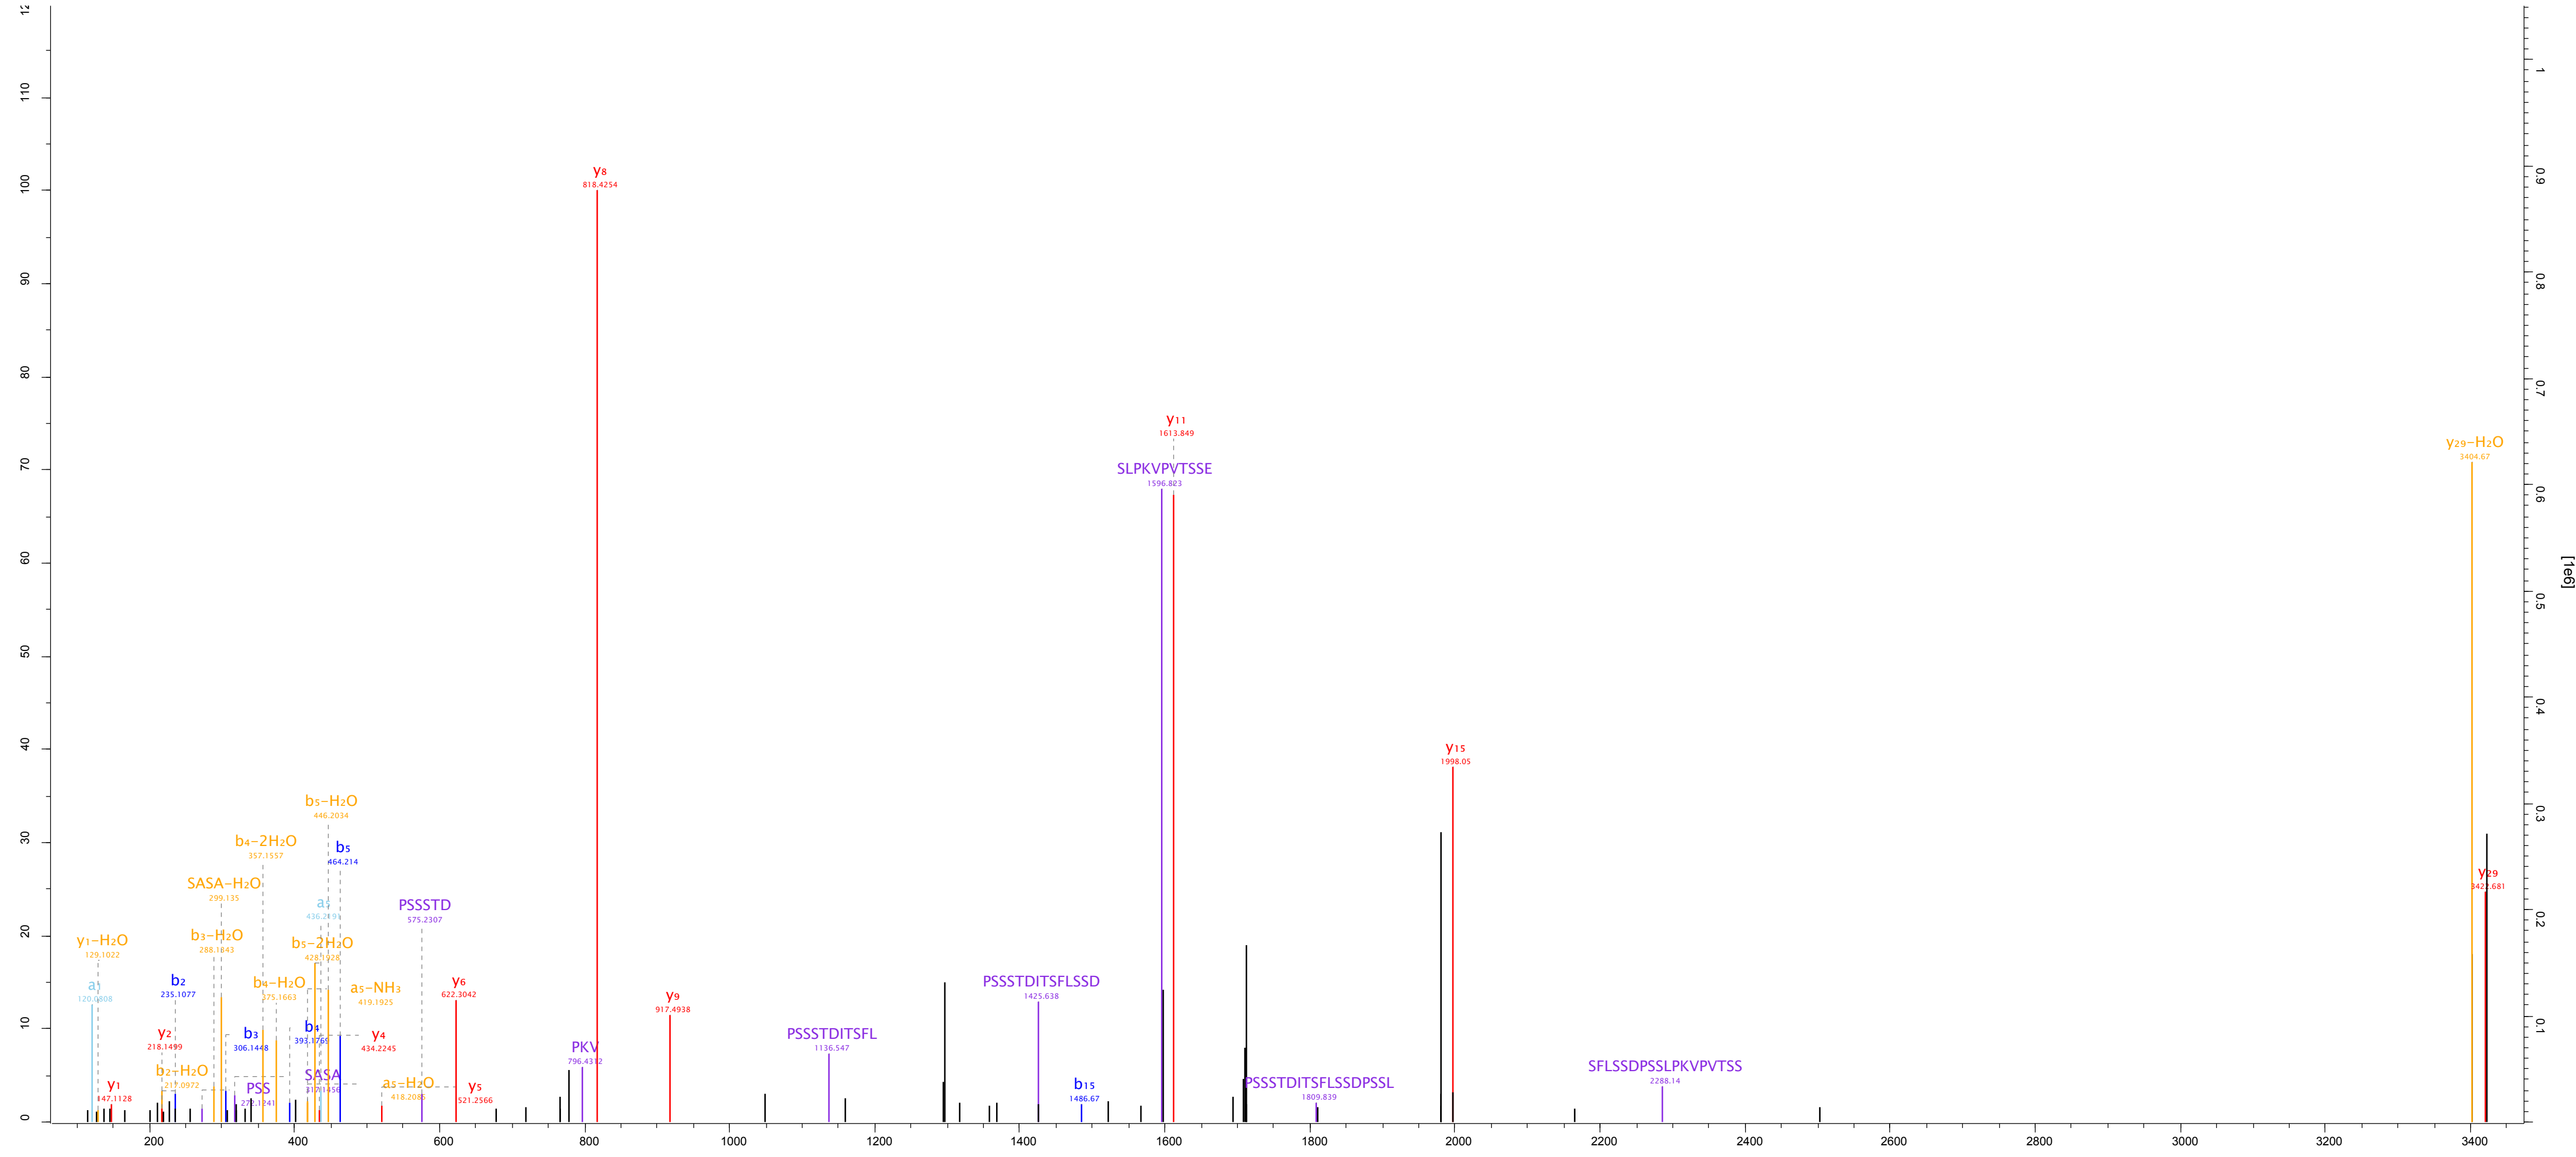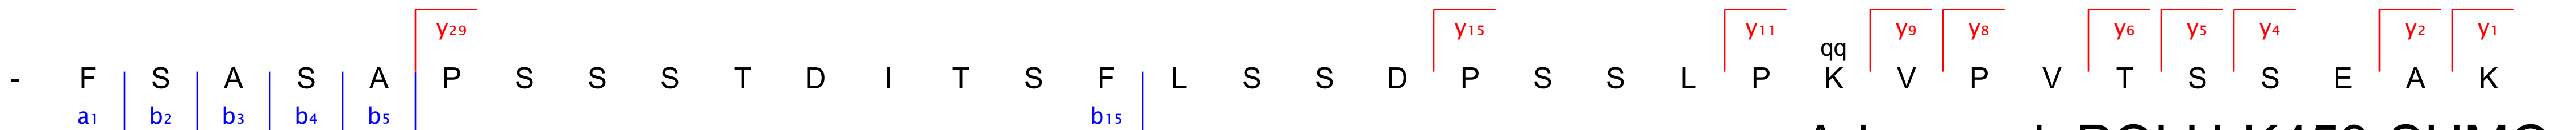

Advanced: POLH-K453-SUMO

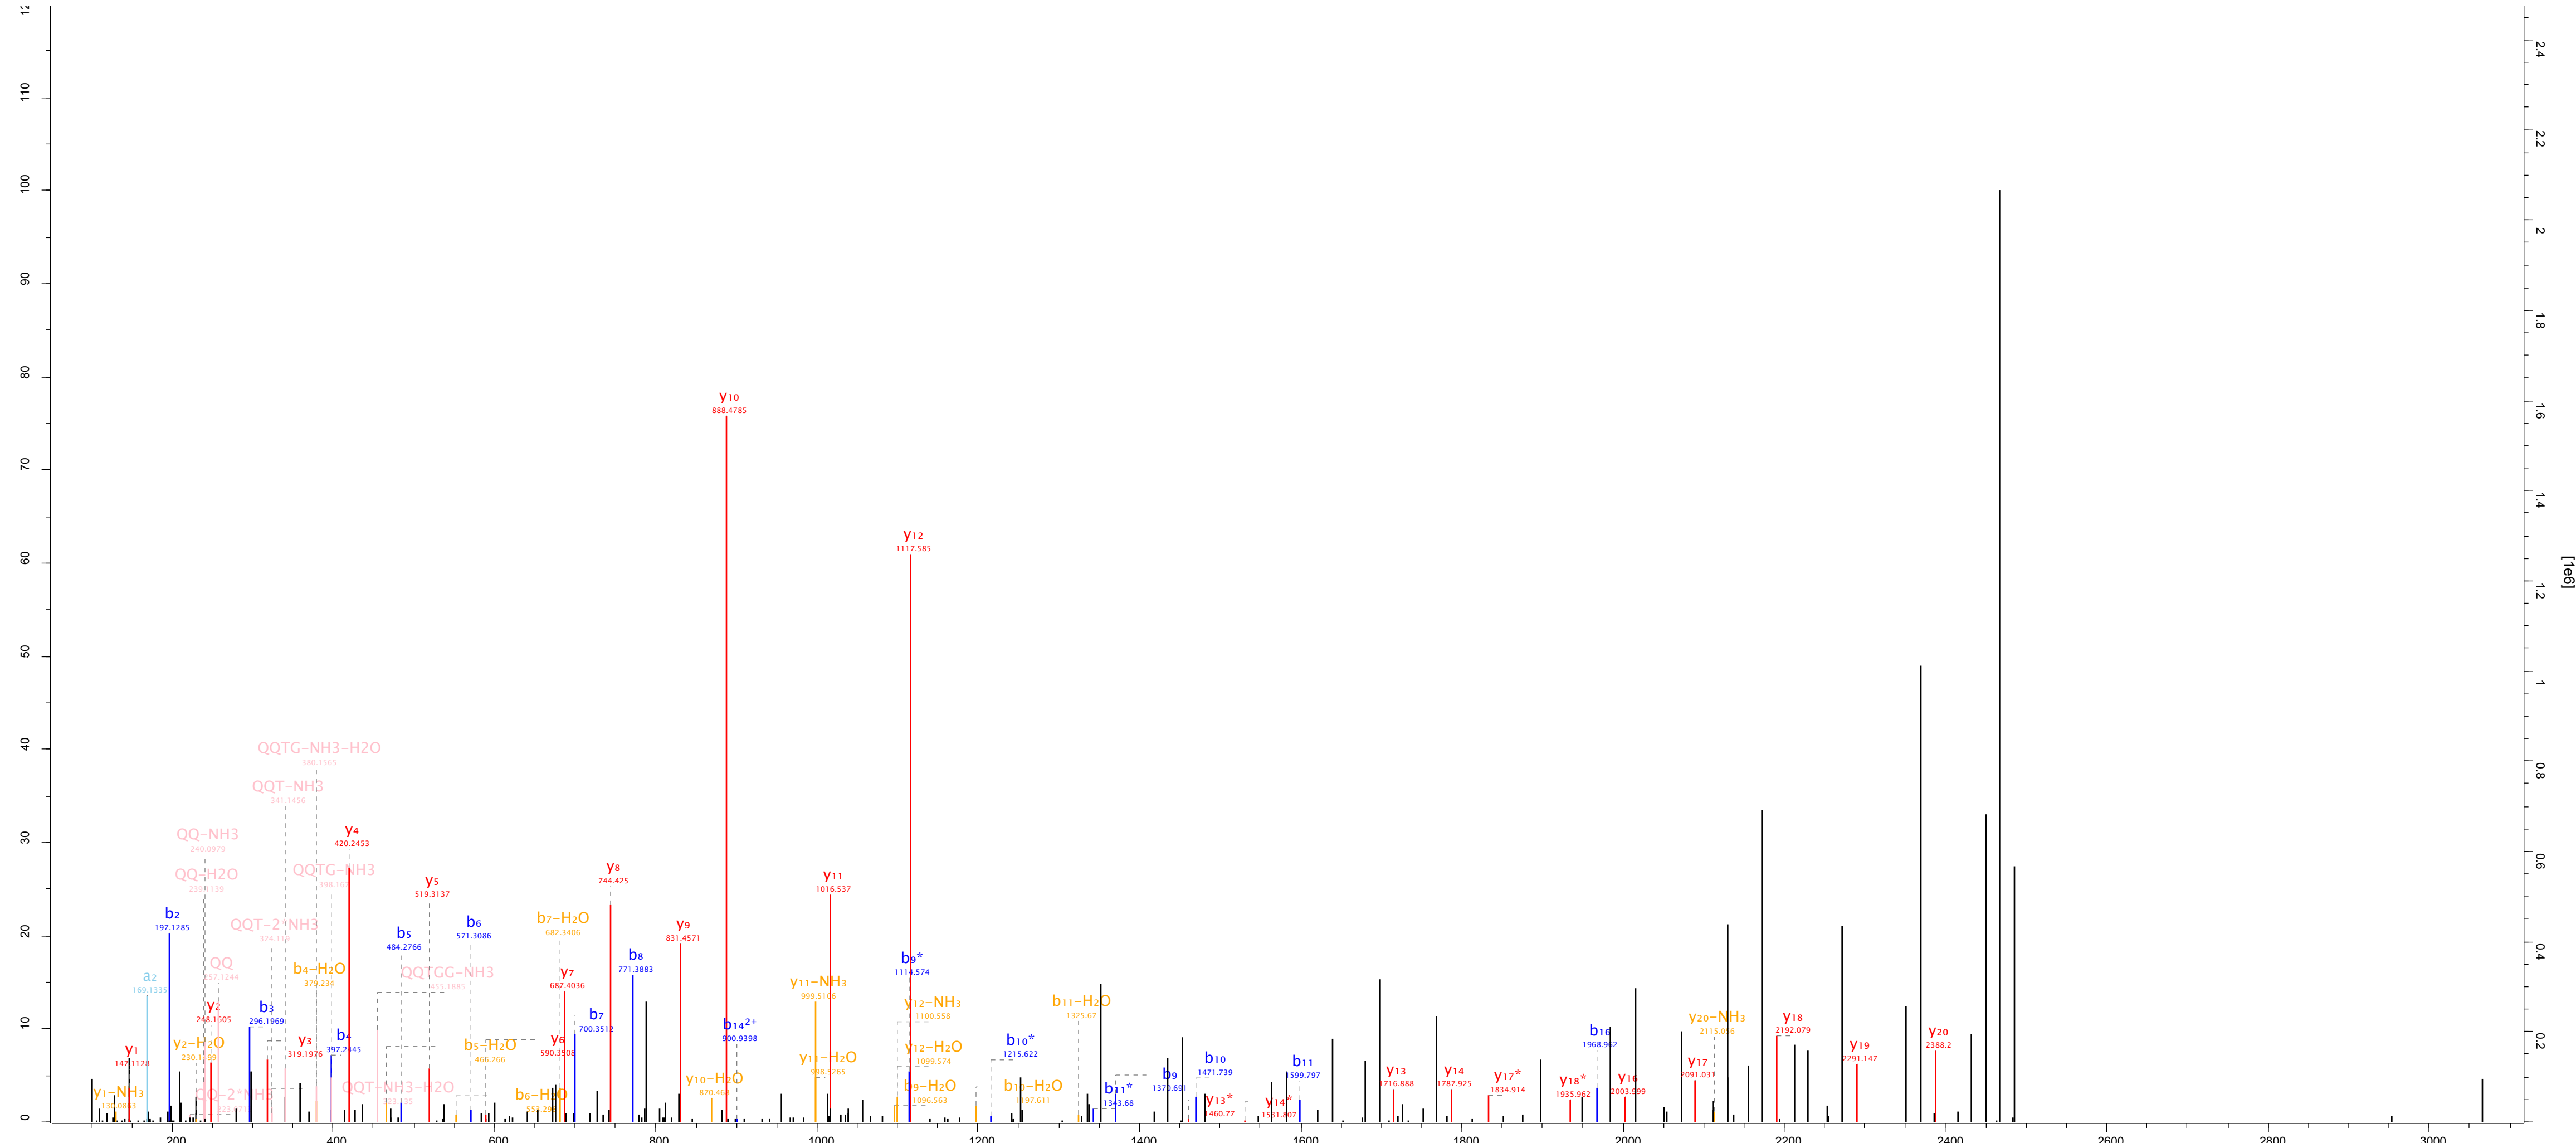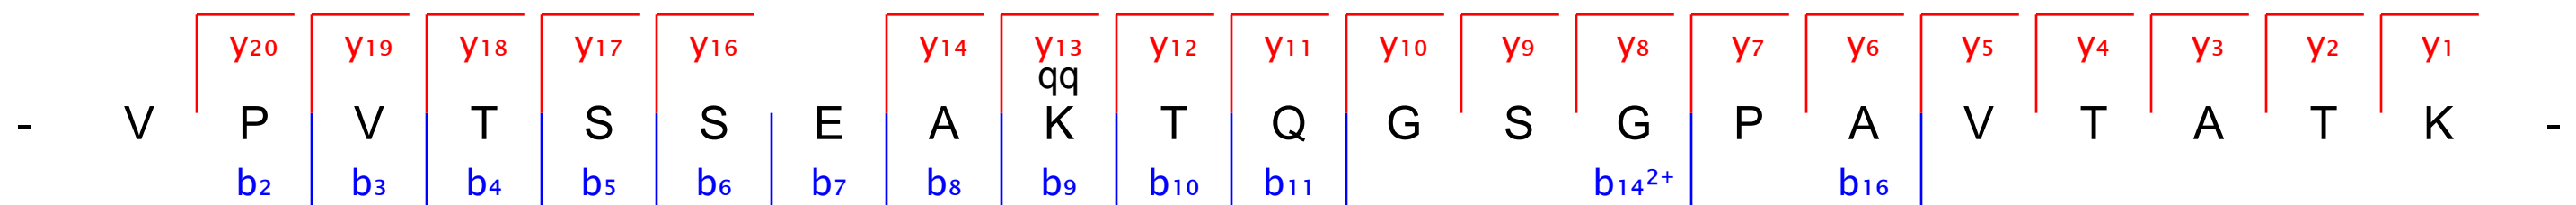

Standard: POLH-K462-SUMO

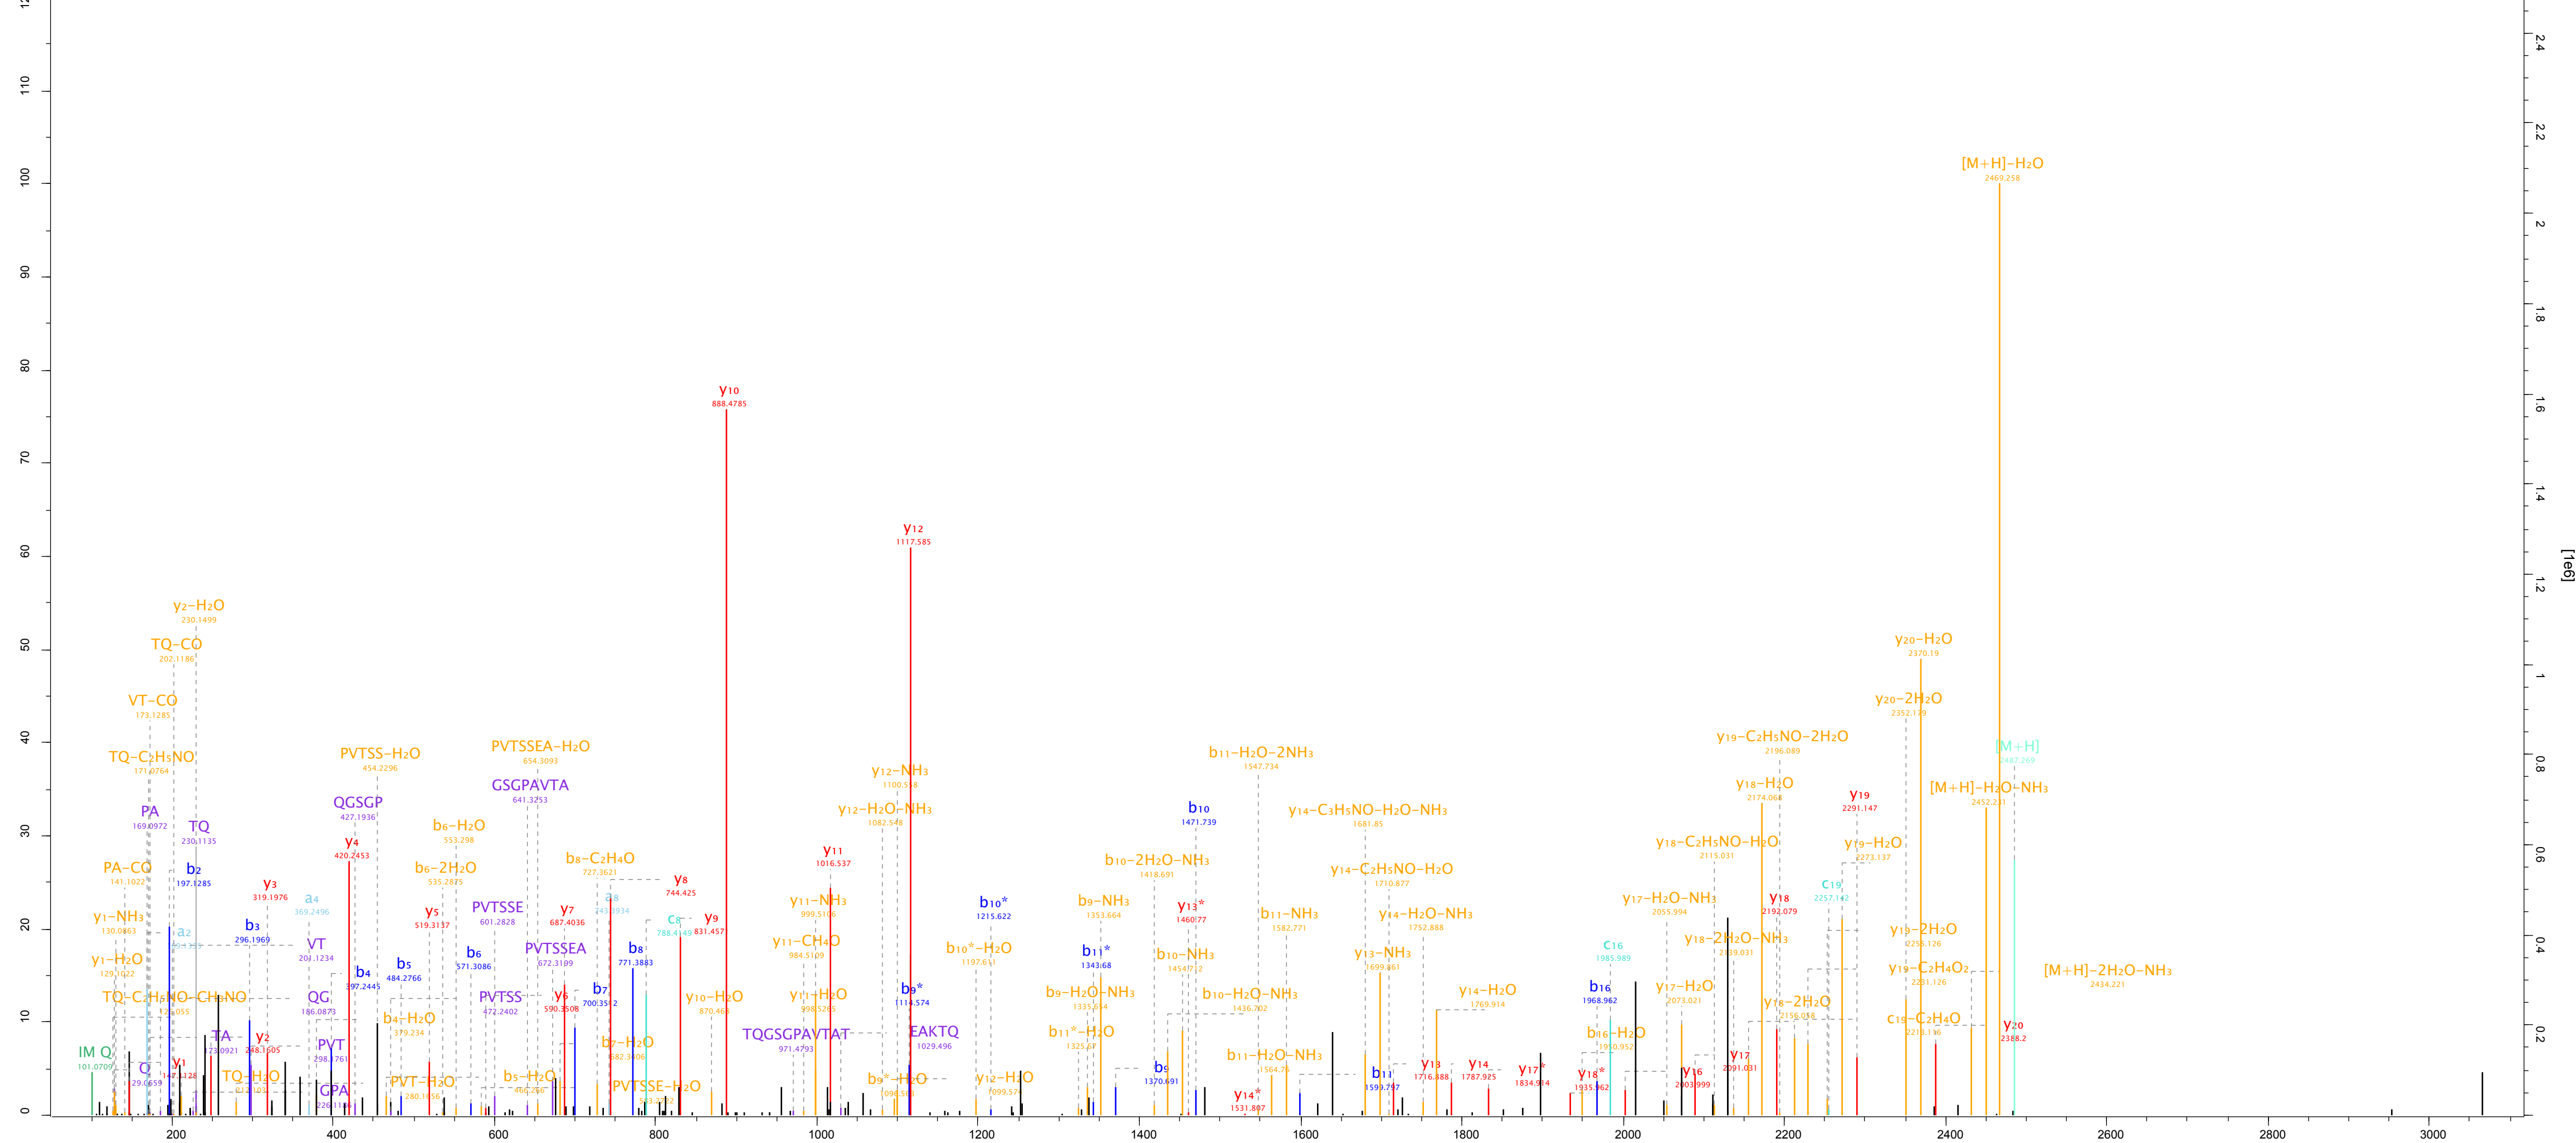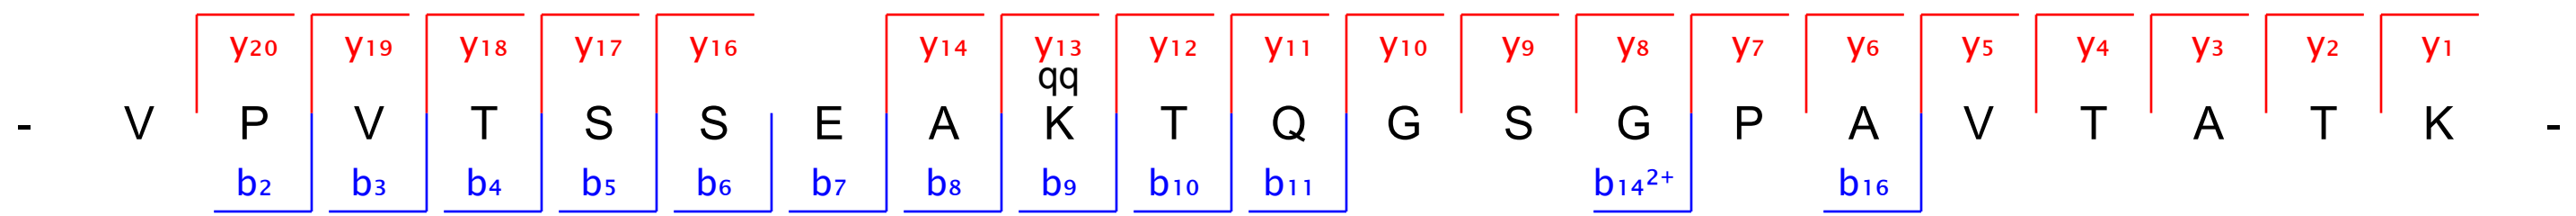

Advanced: POLH-K462-SUMO



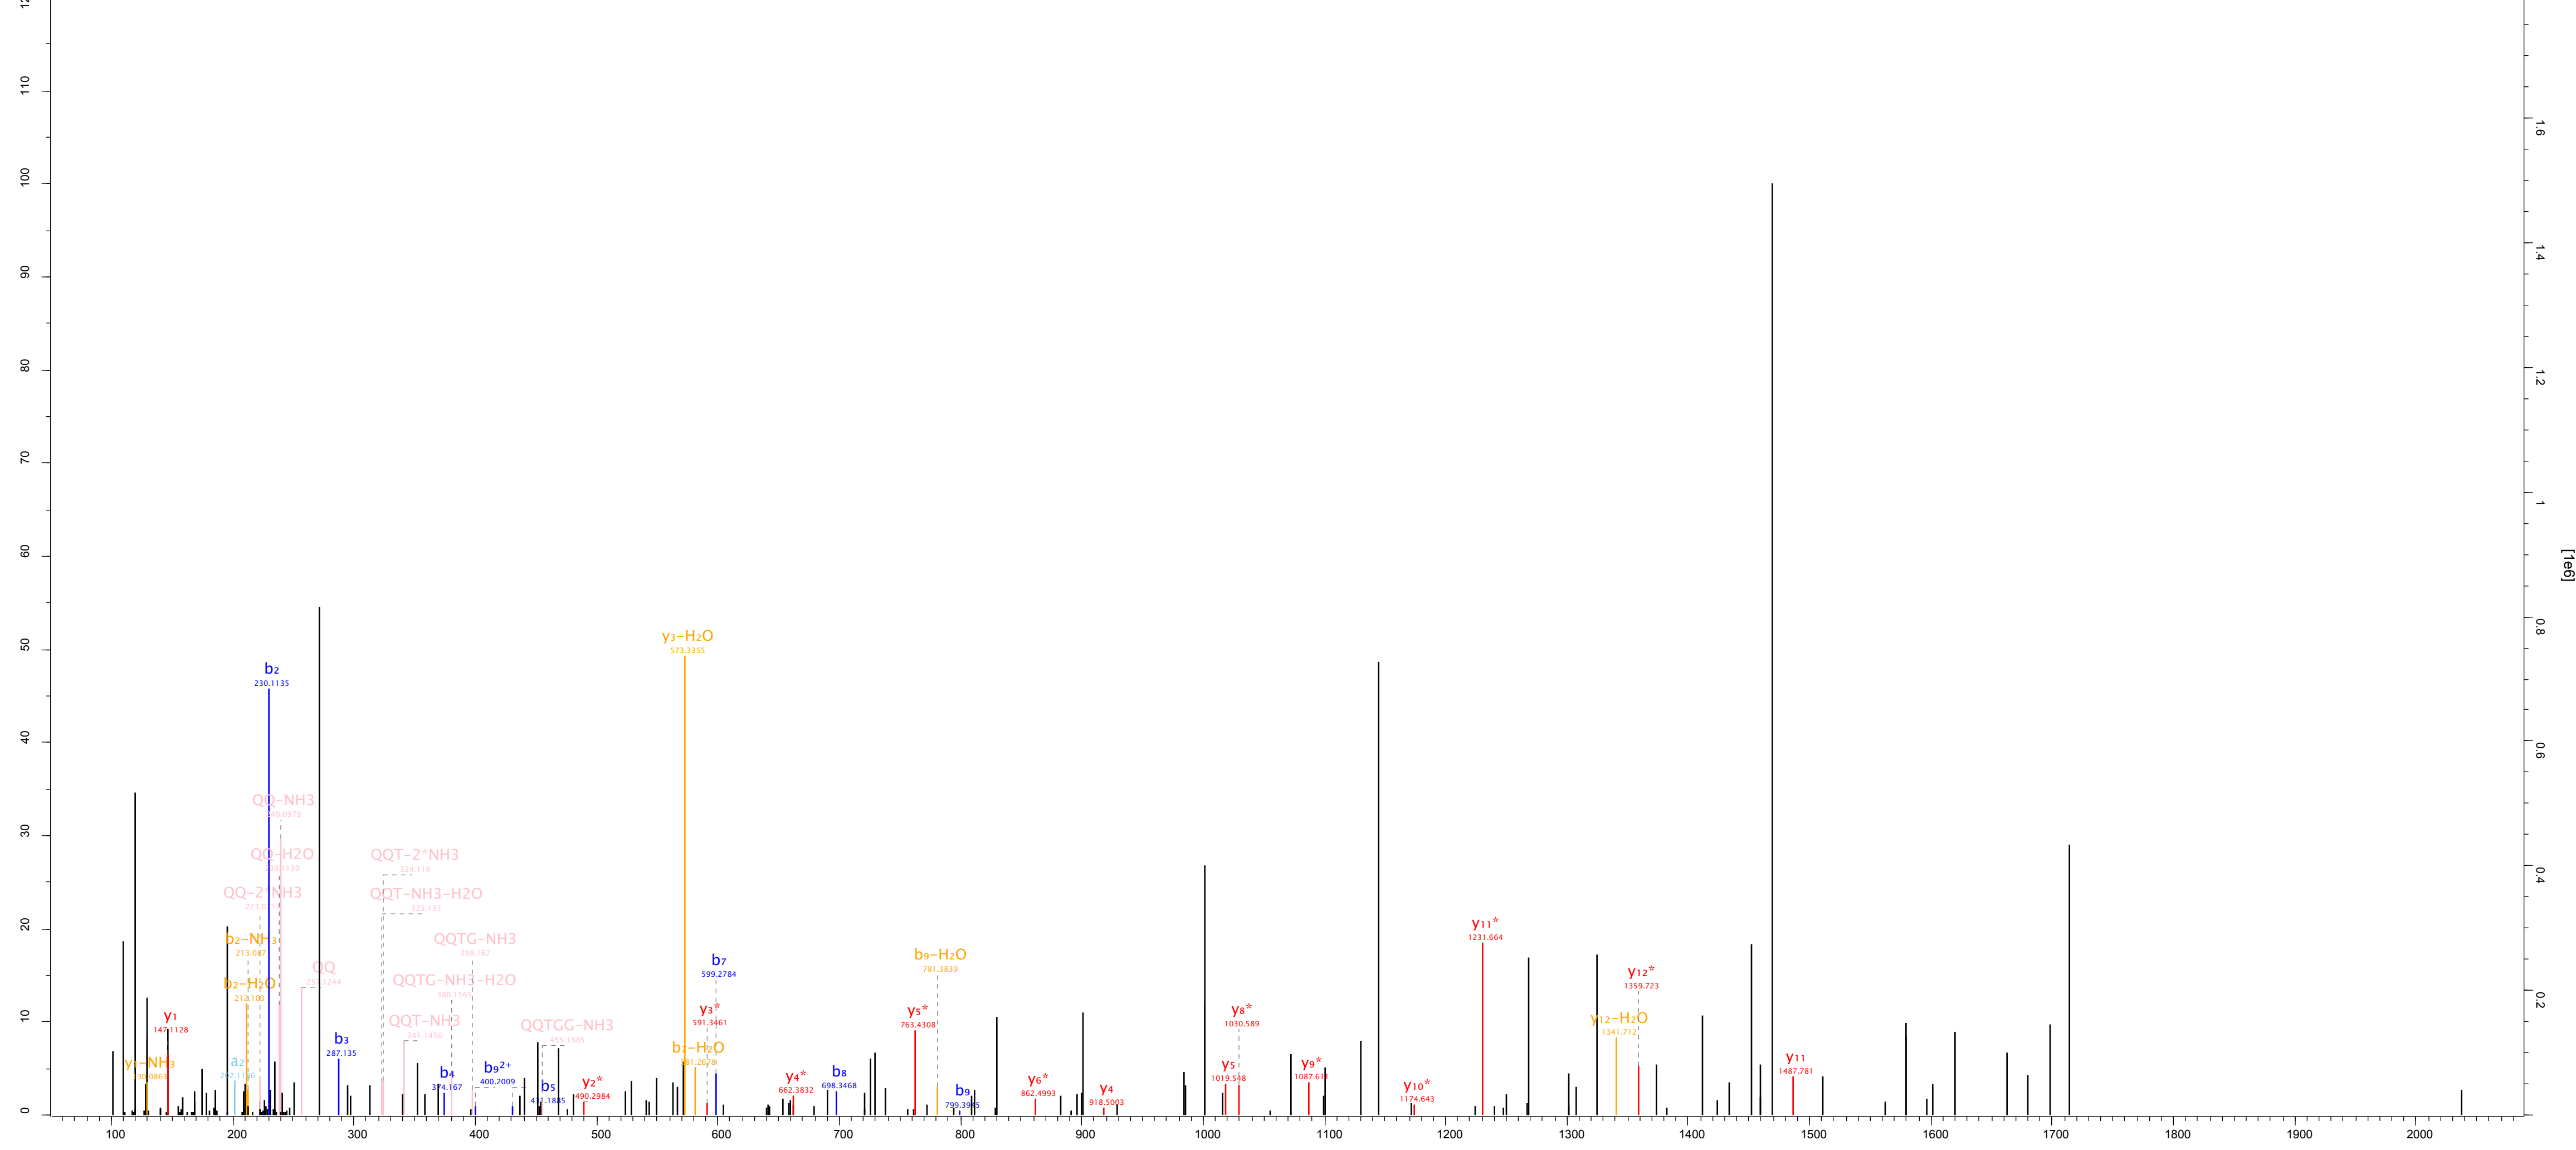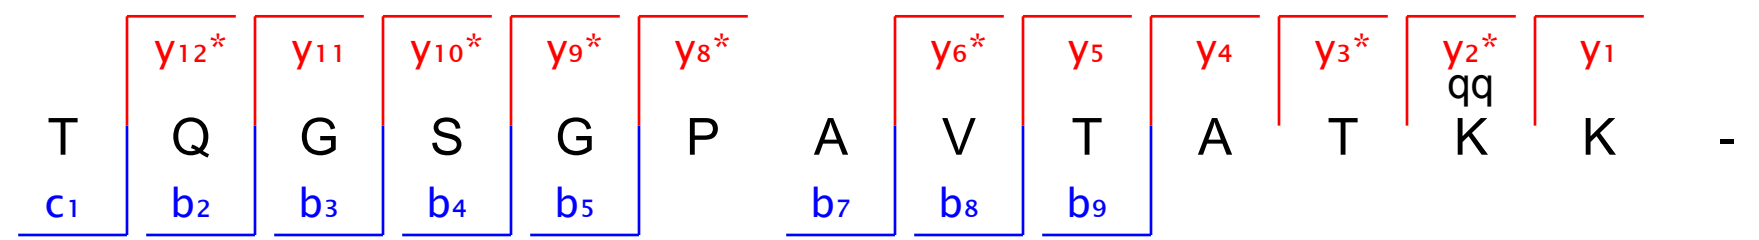

Standard: POLH-K474-SUMO

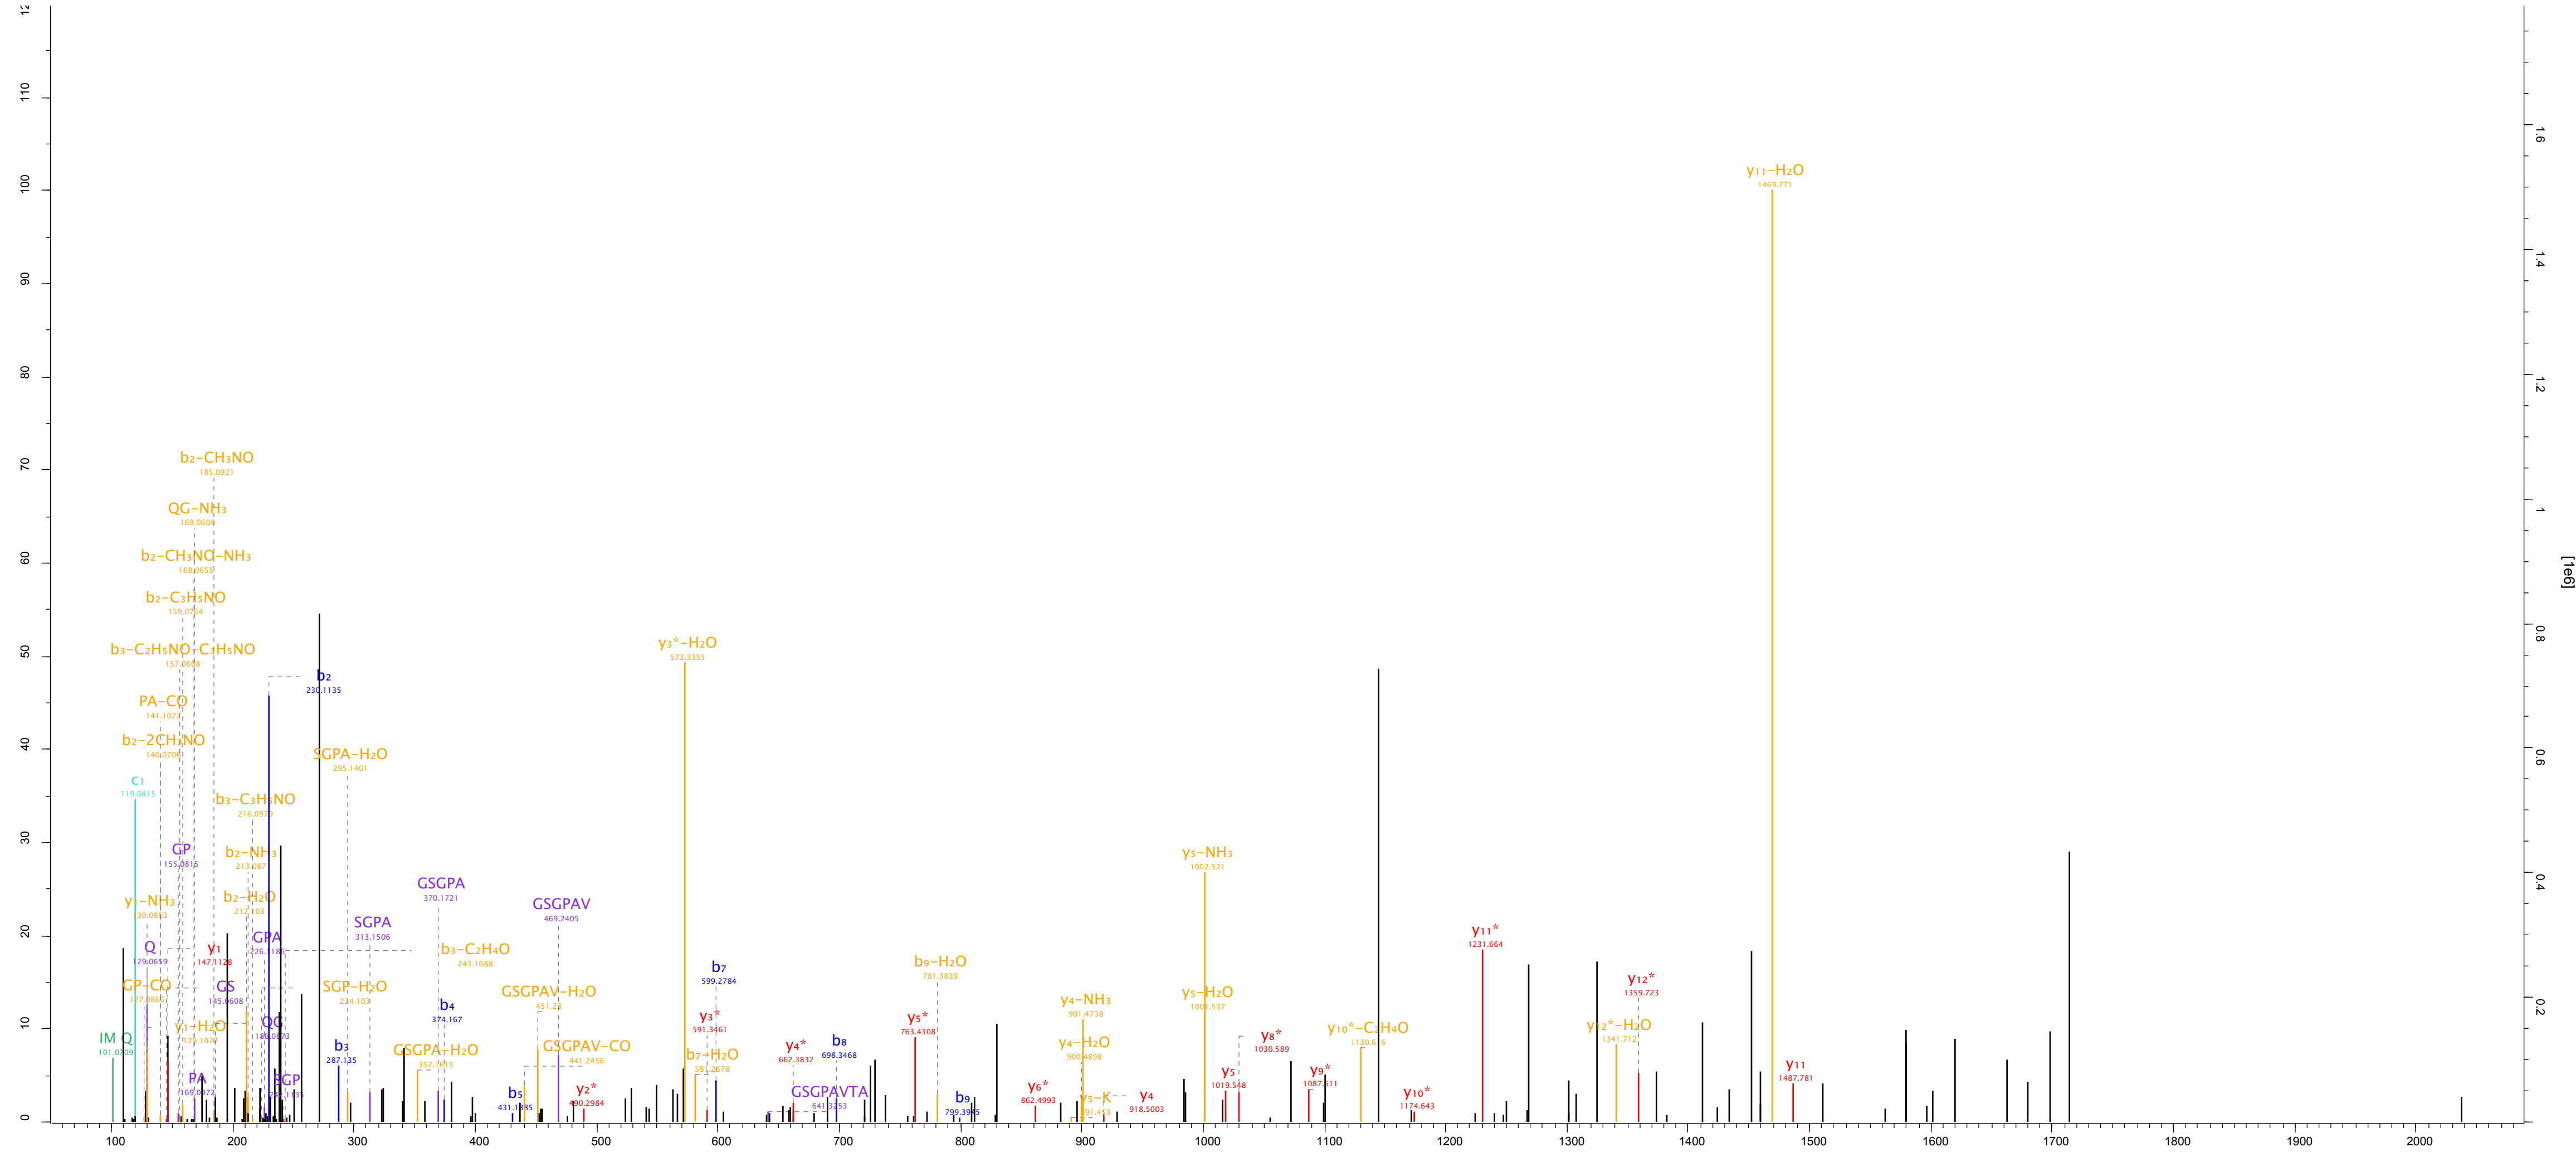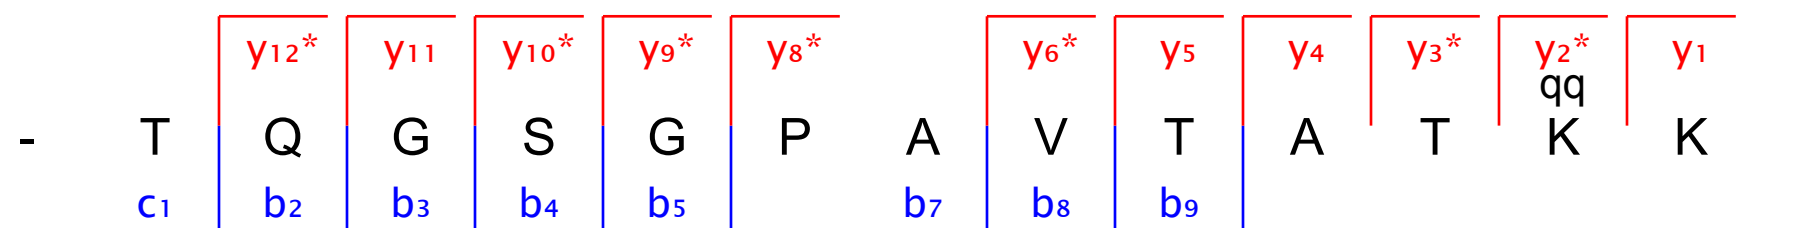

Advanced: POLH-K474-SUMO

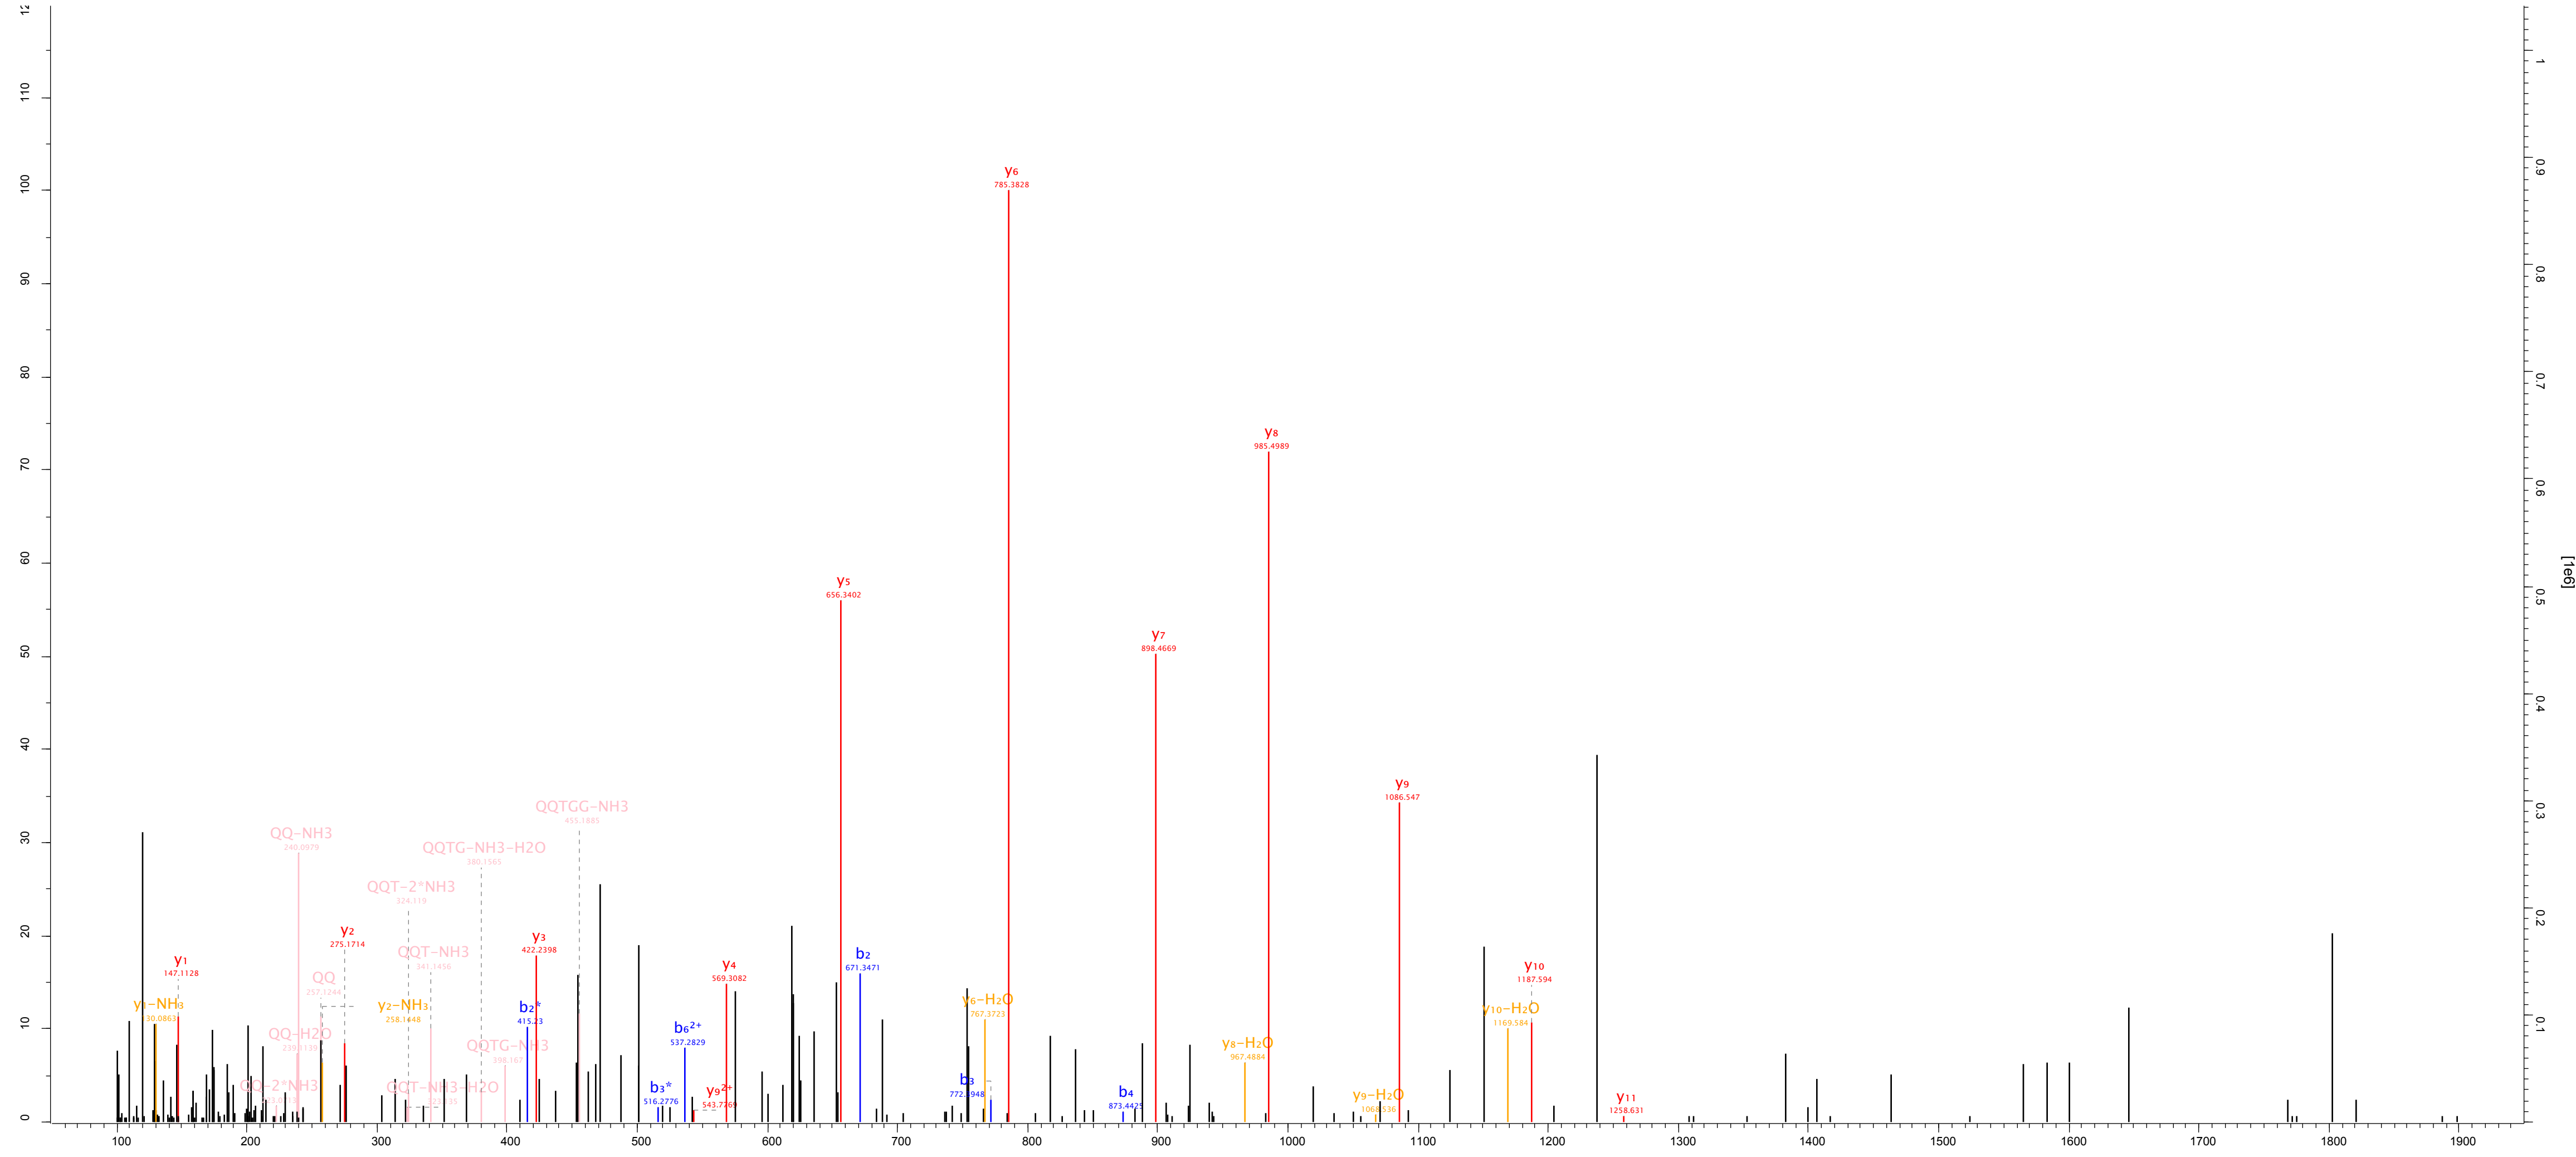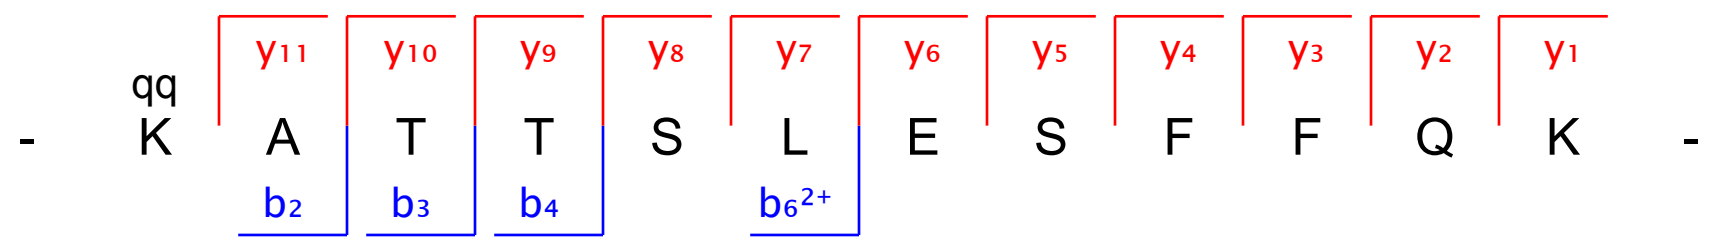

Standard: POLH-K475-SUMO

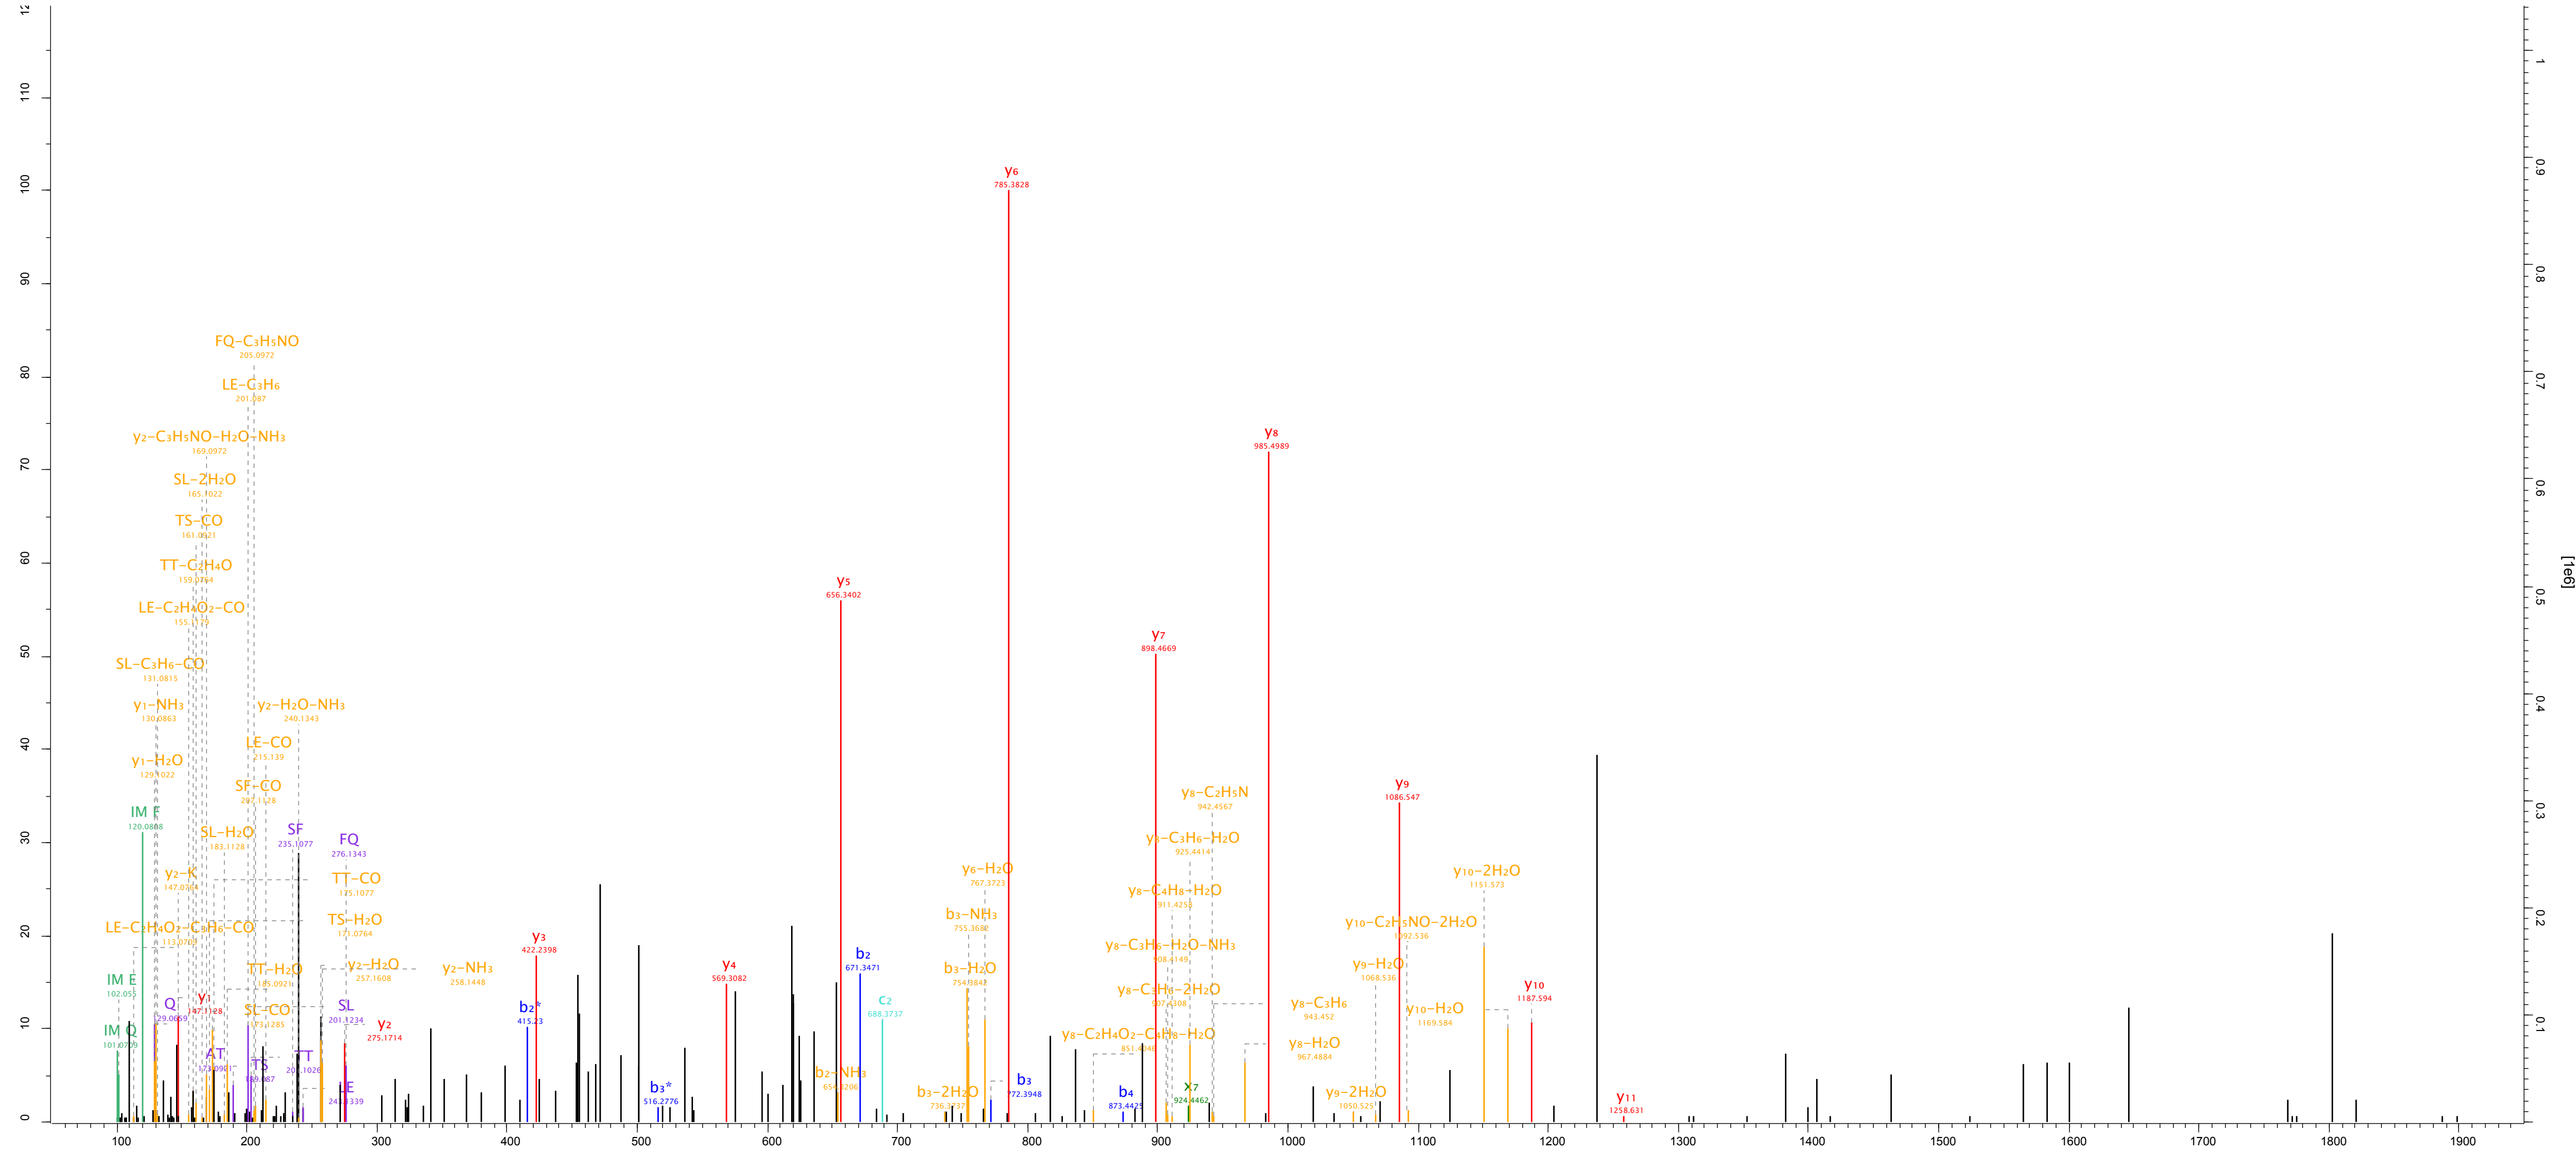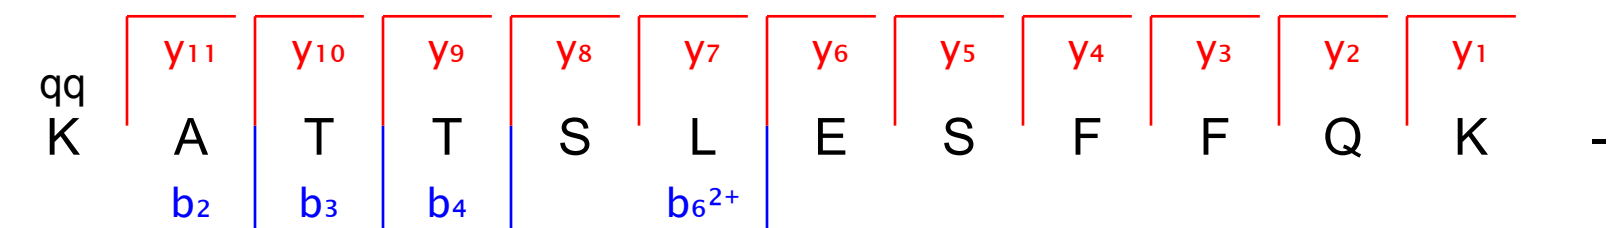

Advanced: POLH-K475-SUMO

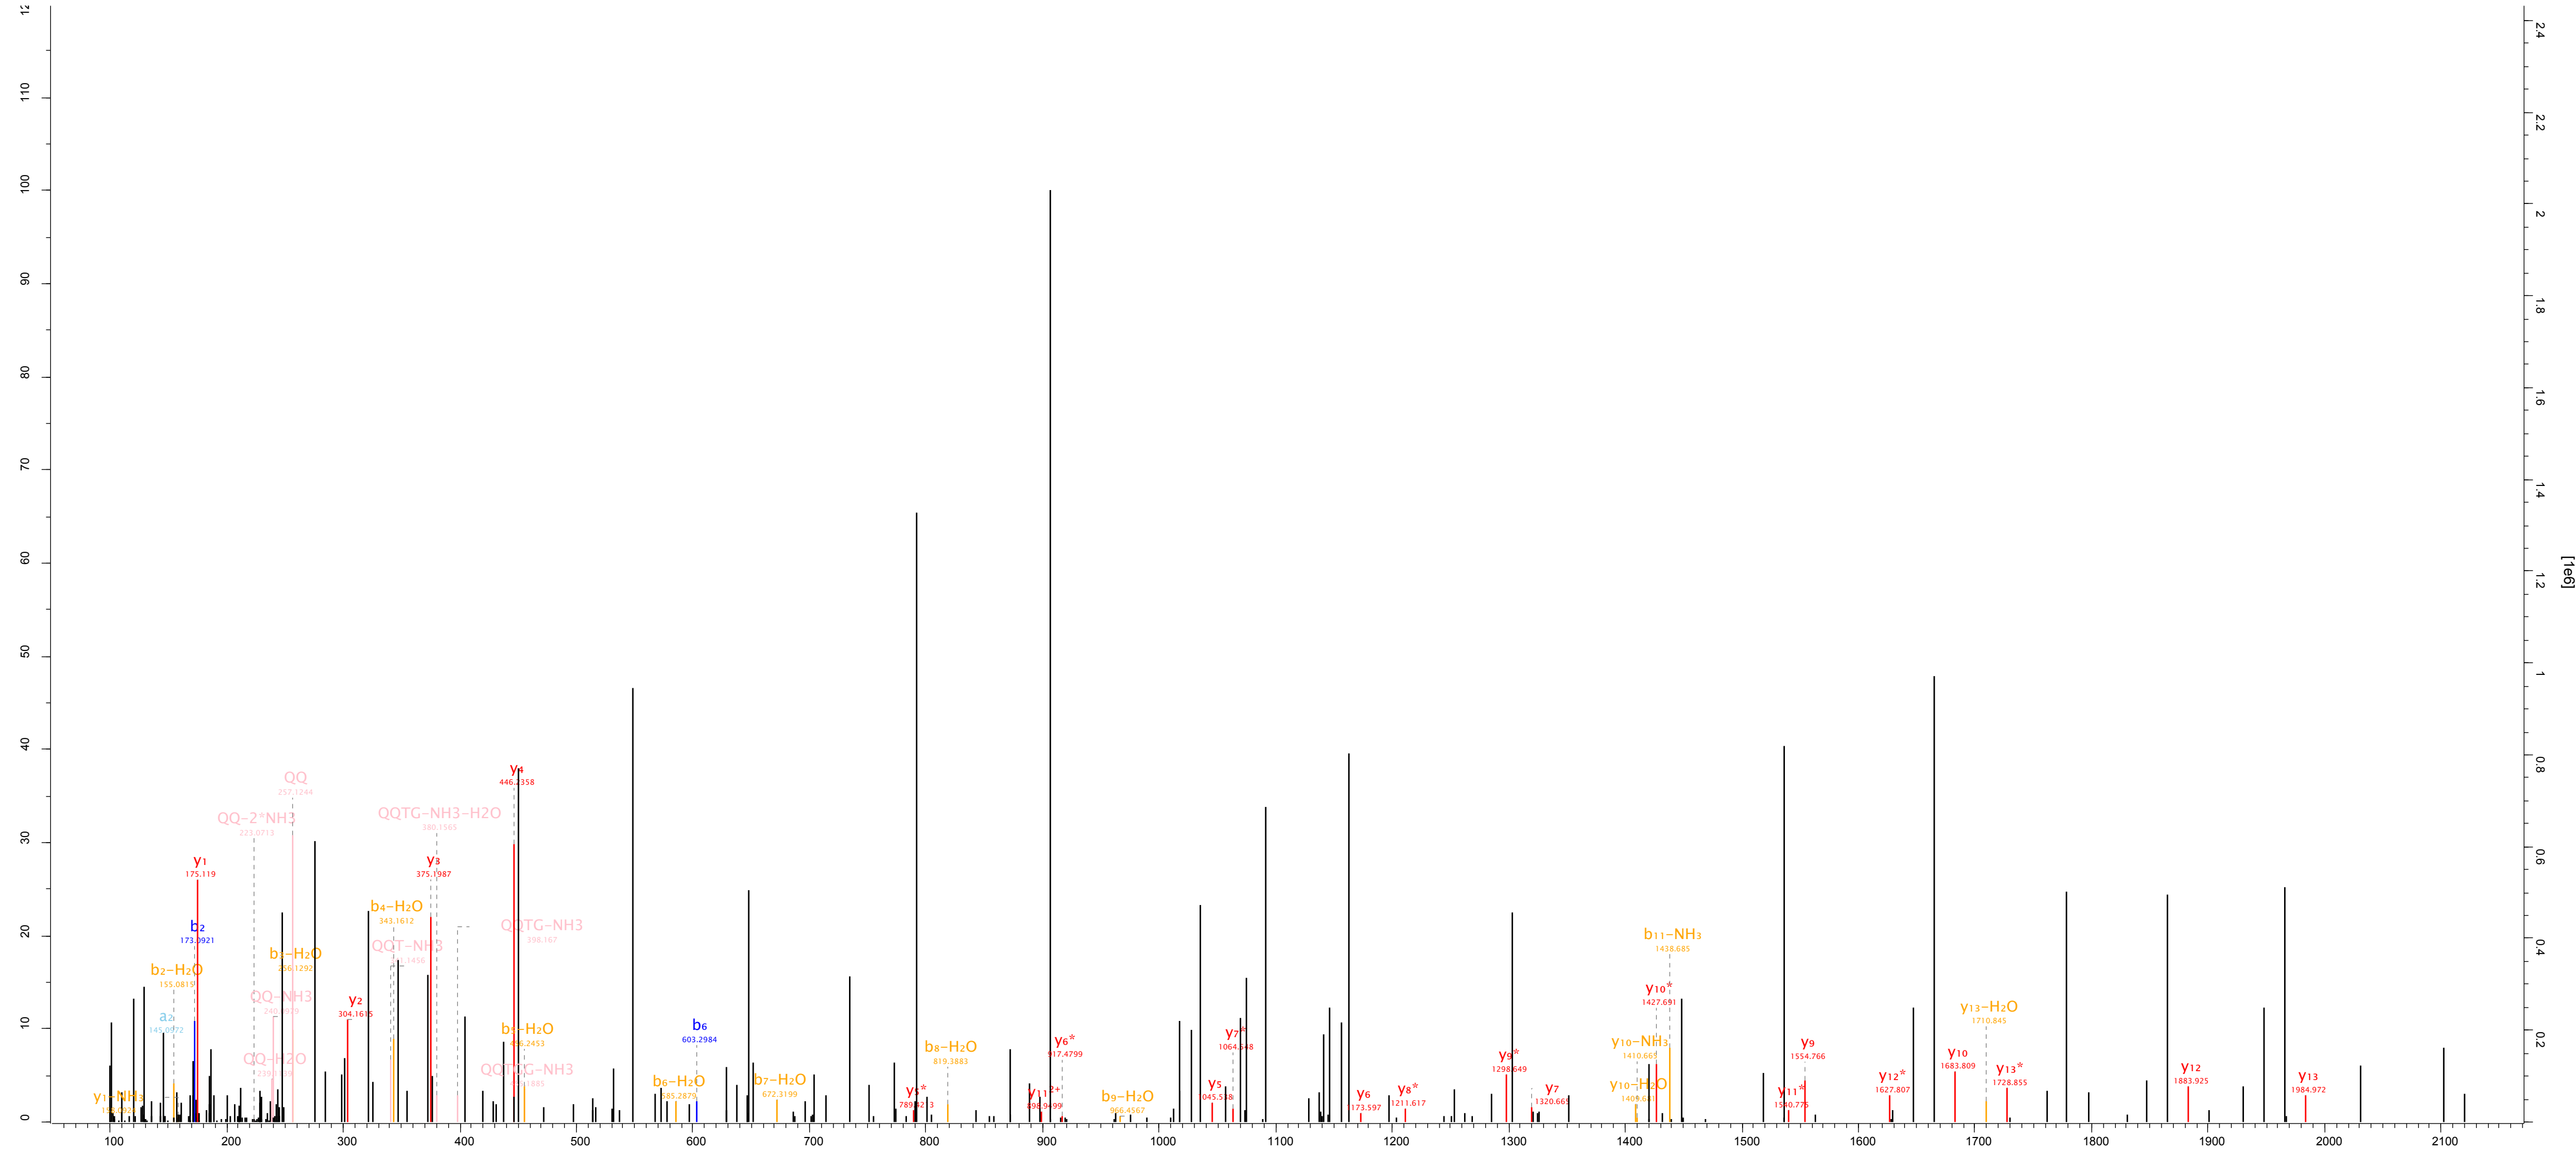

- A T T S L E S F F Q qq K A A E R -

Fragmentation mapping: b2 (under T), b6 (under E), y13 (under T), y12 (under S), y11\* (under L), y10 (under E), y9 (under S), y8\* (under F), y7 (under F), y6 (under Q), y5 (under qq), y4 (under K), y3 (under A), y2 (under A), y1 (under E).

Standard: POLH-K486-SUMO

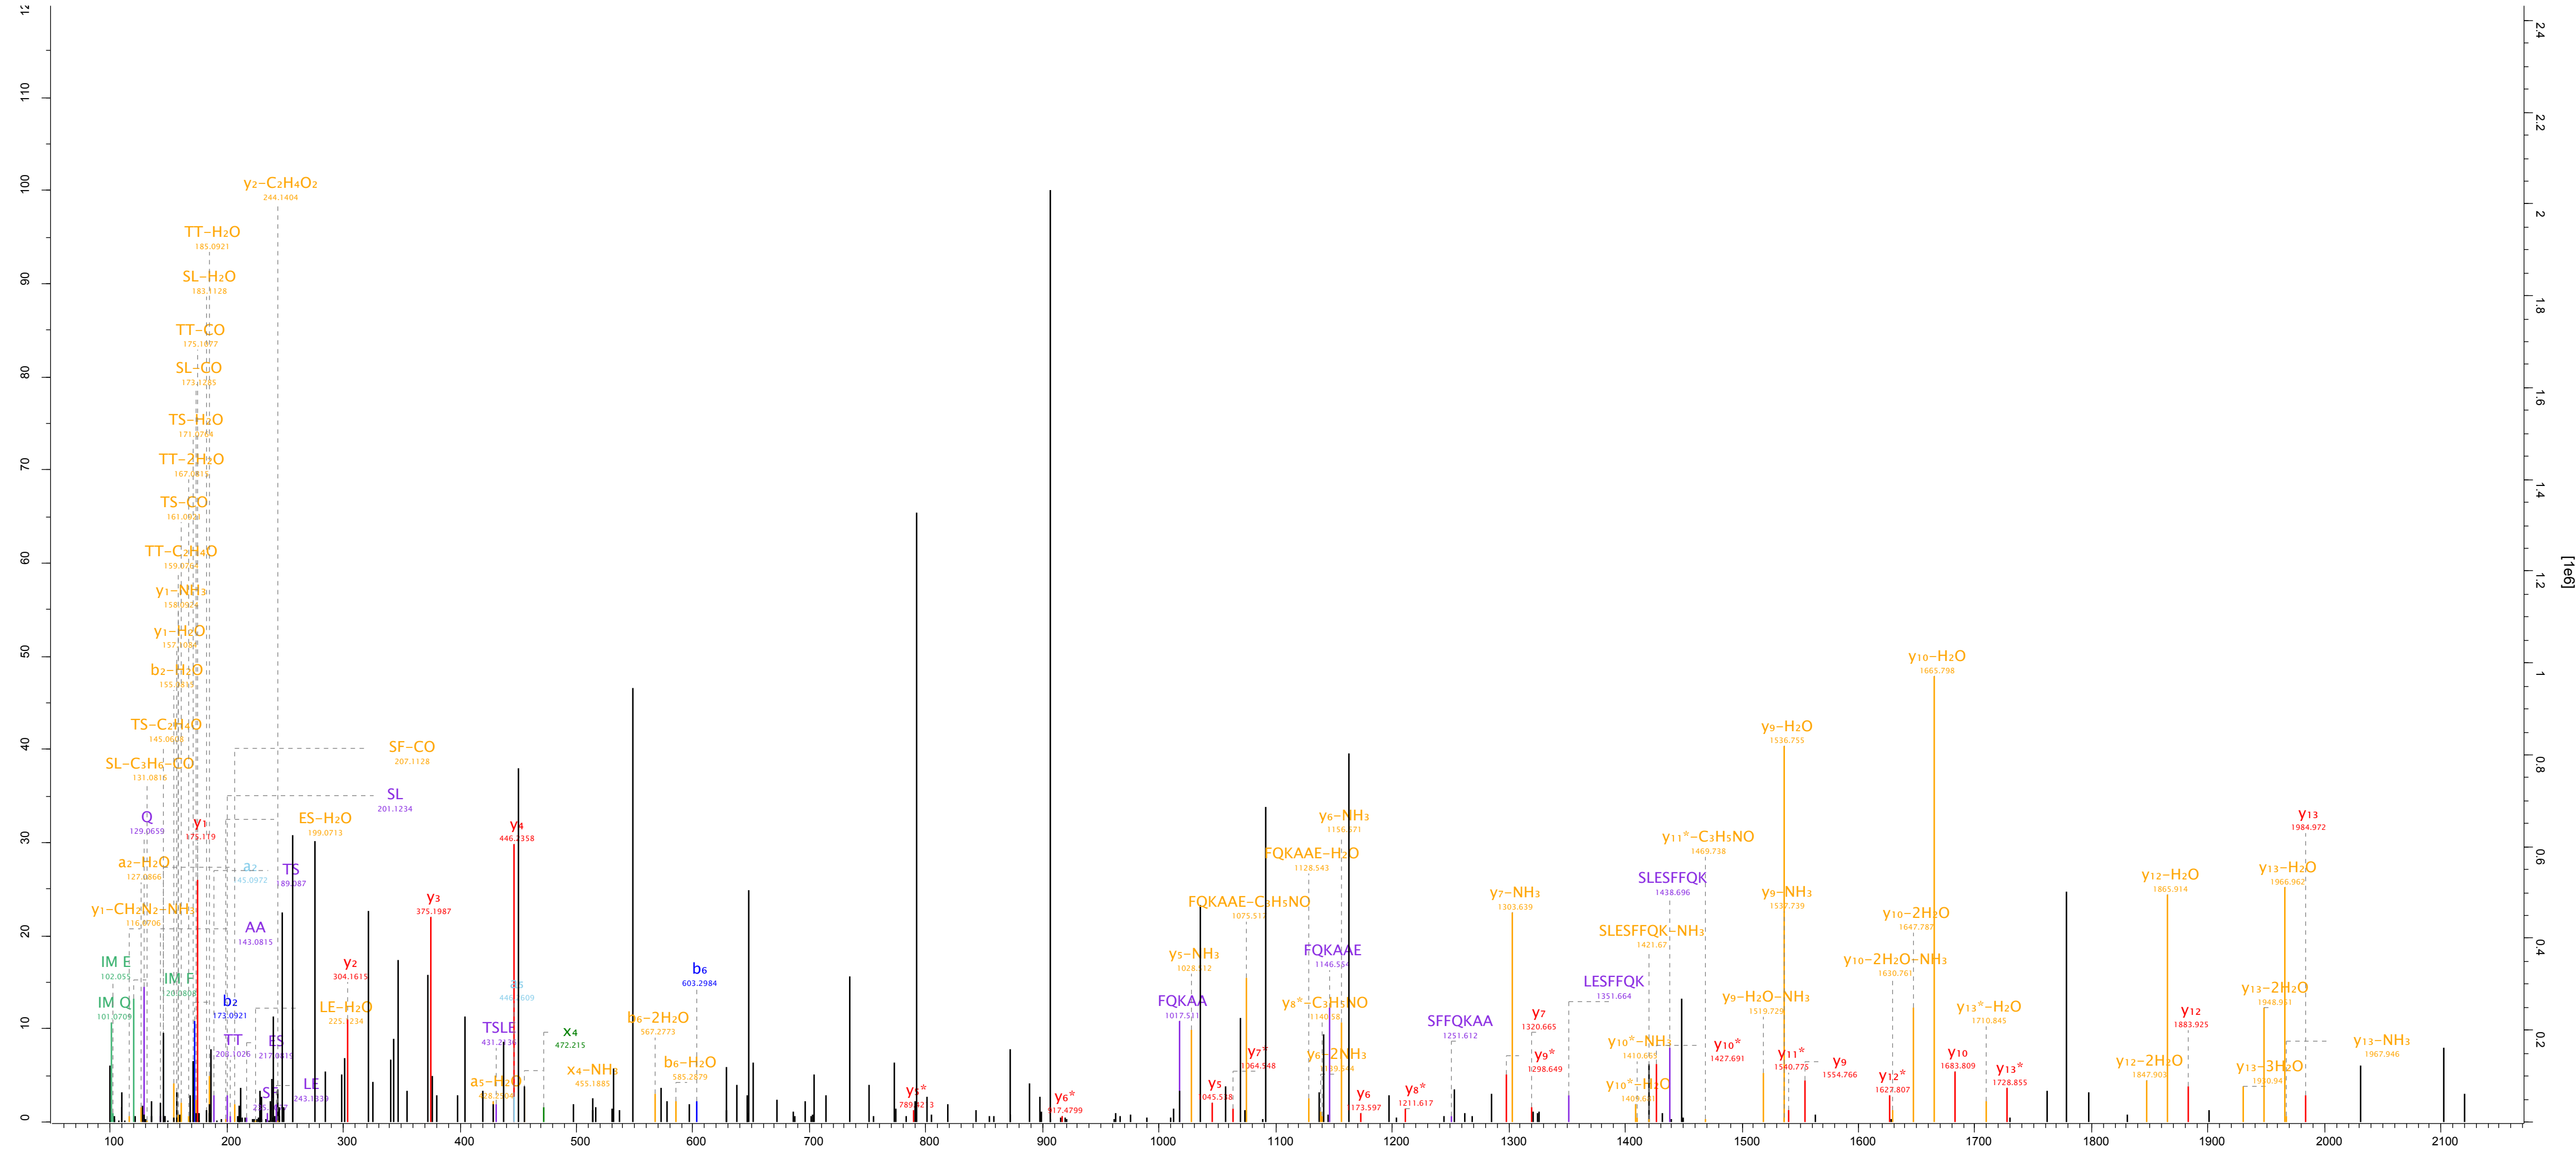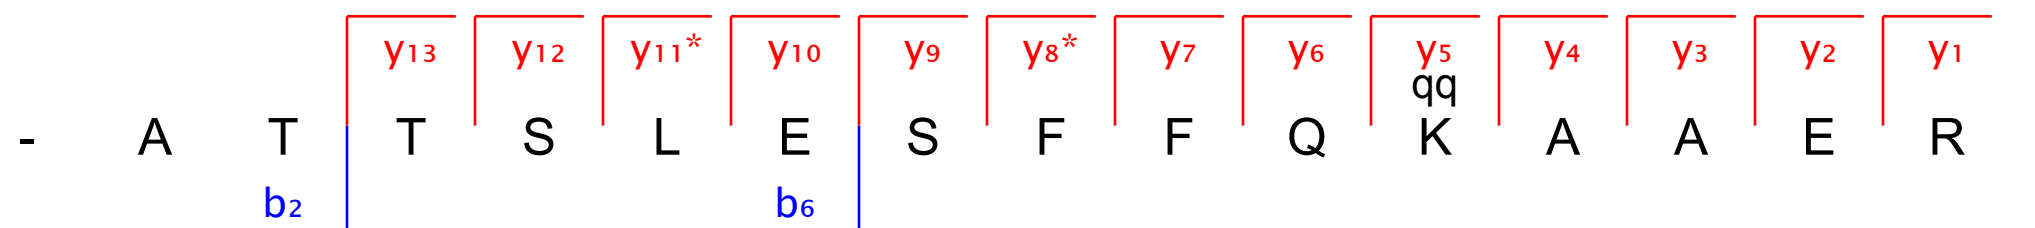

Advanced: POLH-K486-SUMO

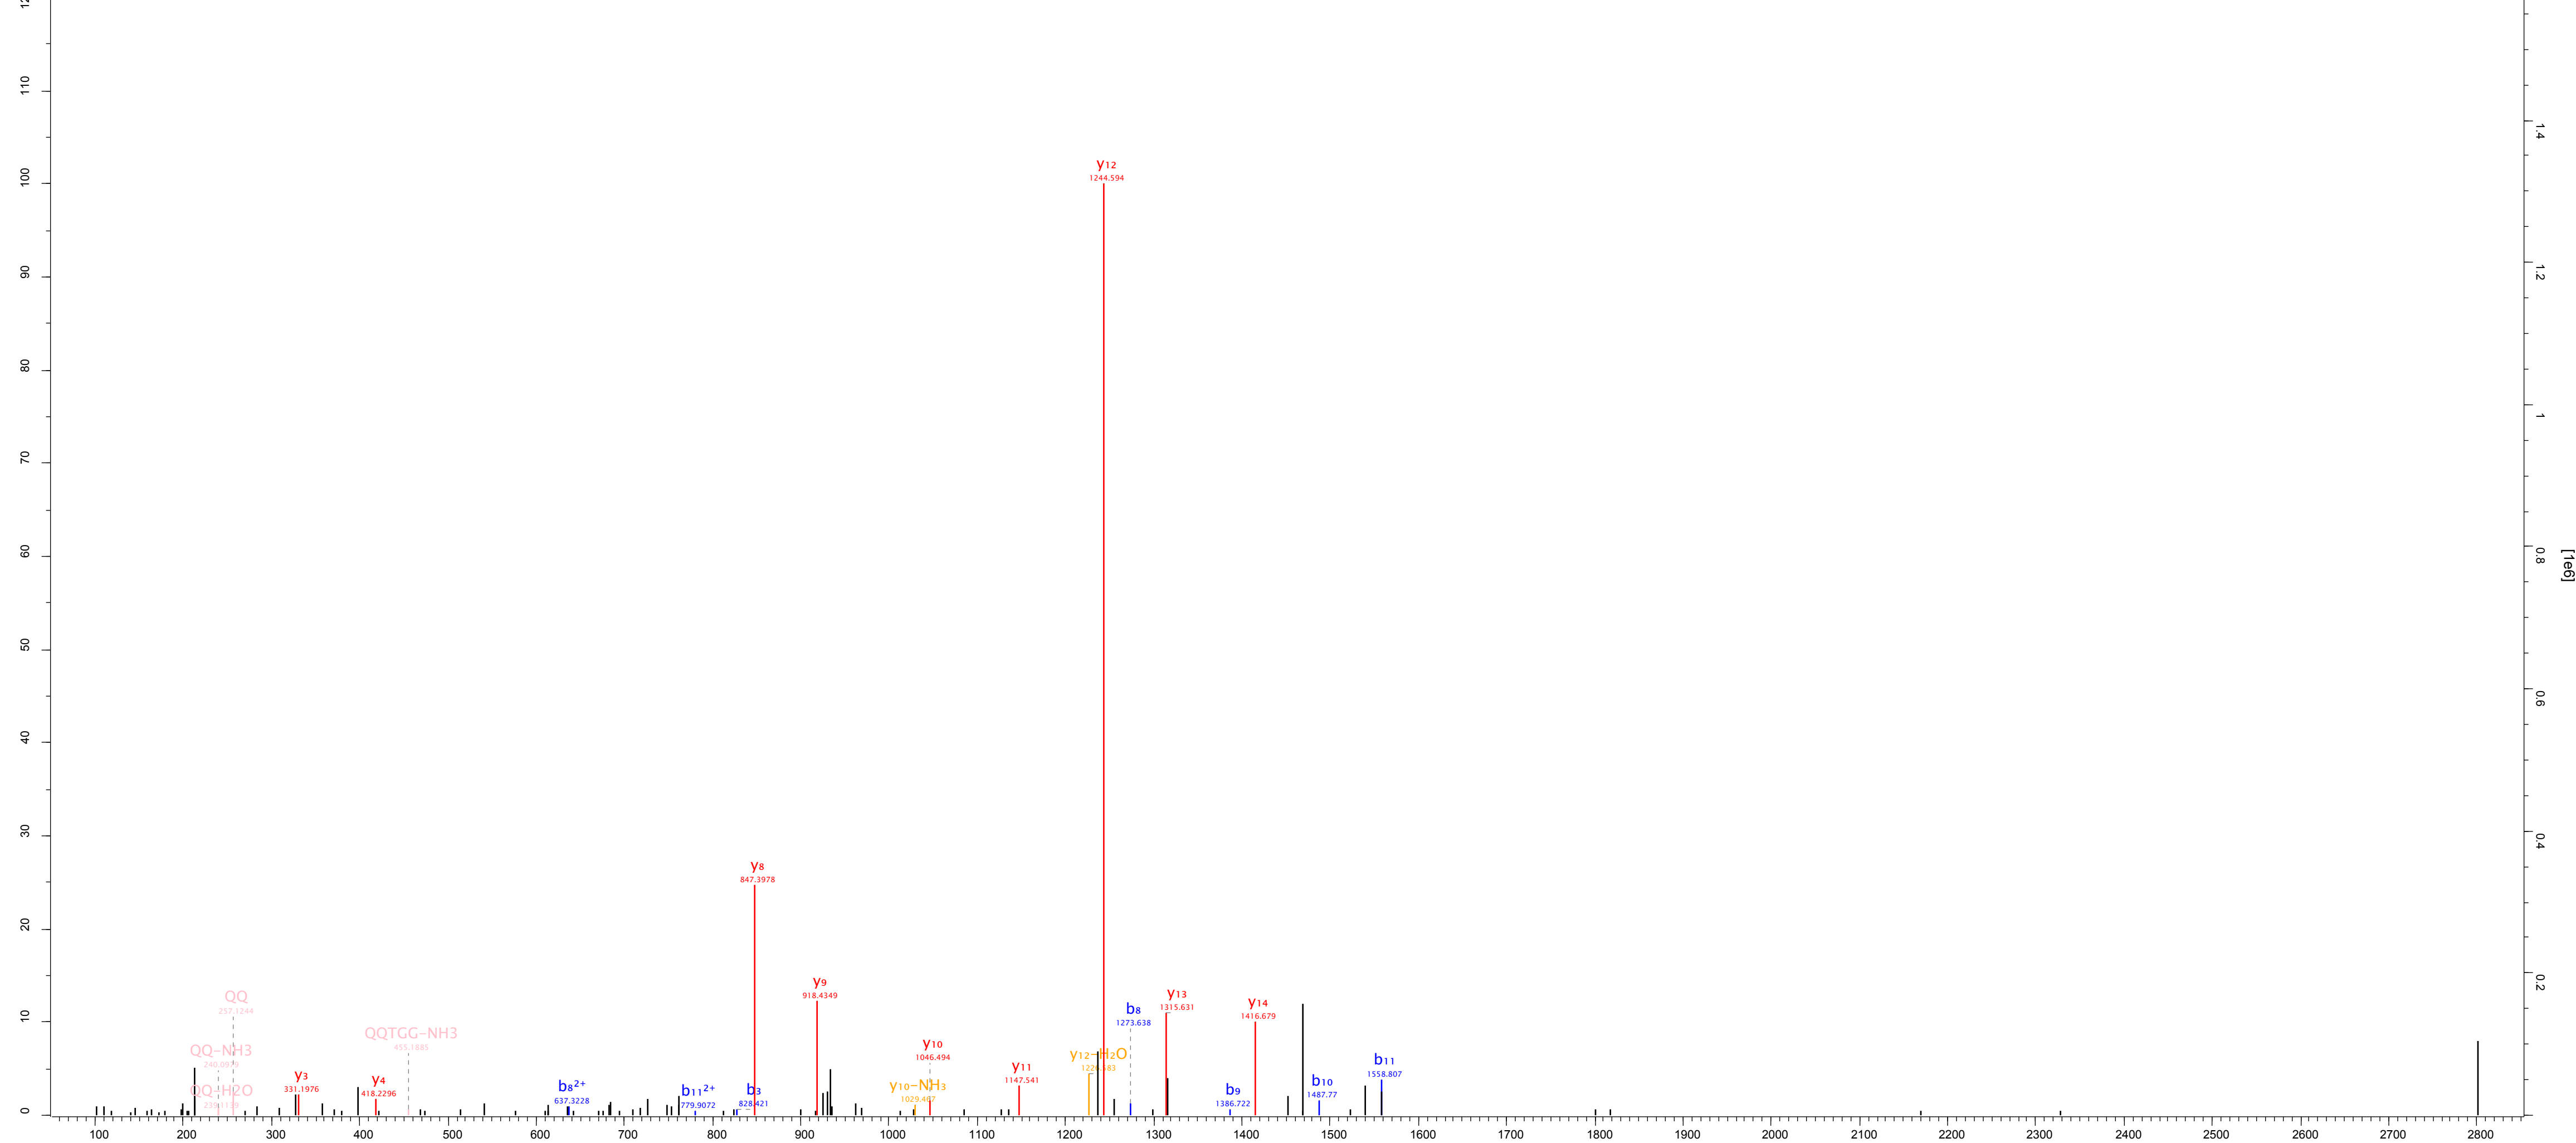

- V K qq E A S L S L T A P T Q A P M S N S P S K -

b3 b8 b9 b10 b11 y14 y13 y12 y11 y10 y9 y8 y4 y3

Standard: POLH-K494-SUMO

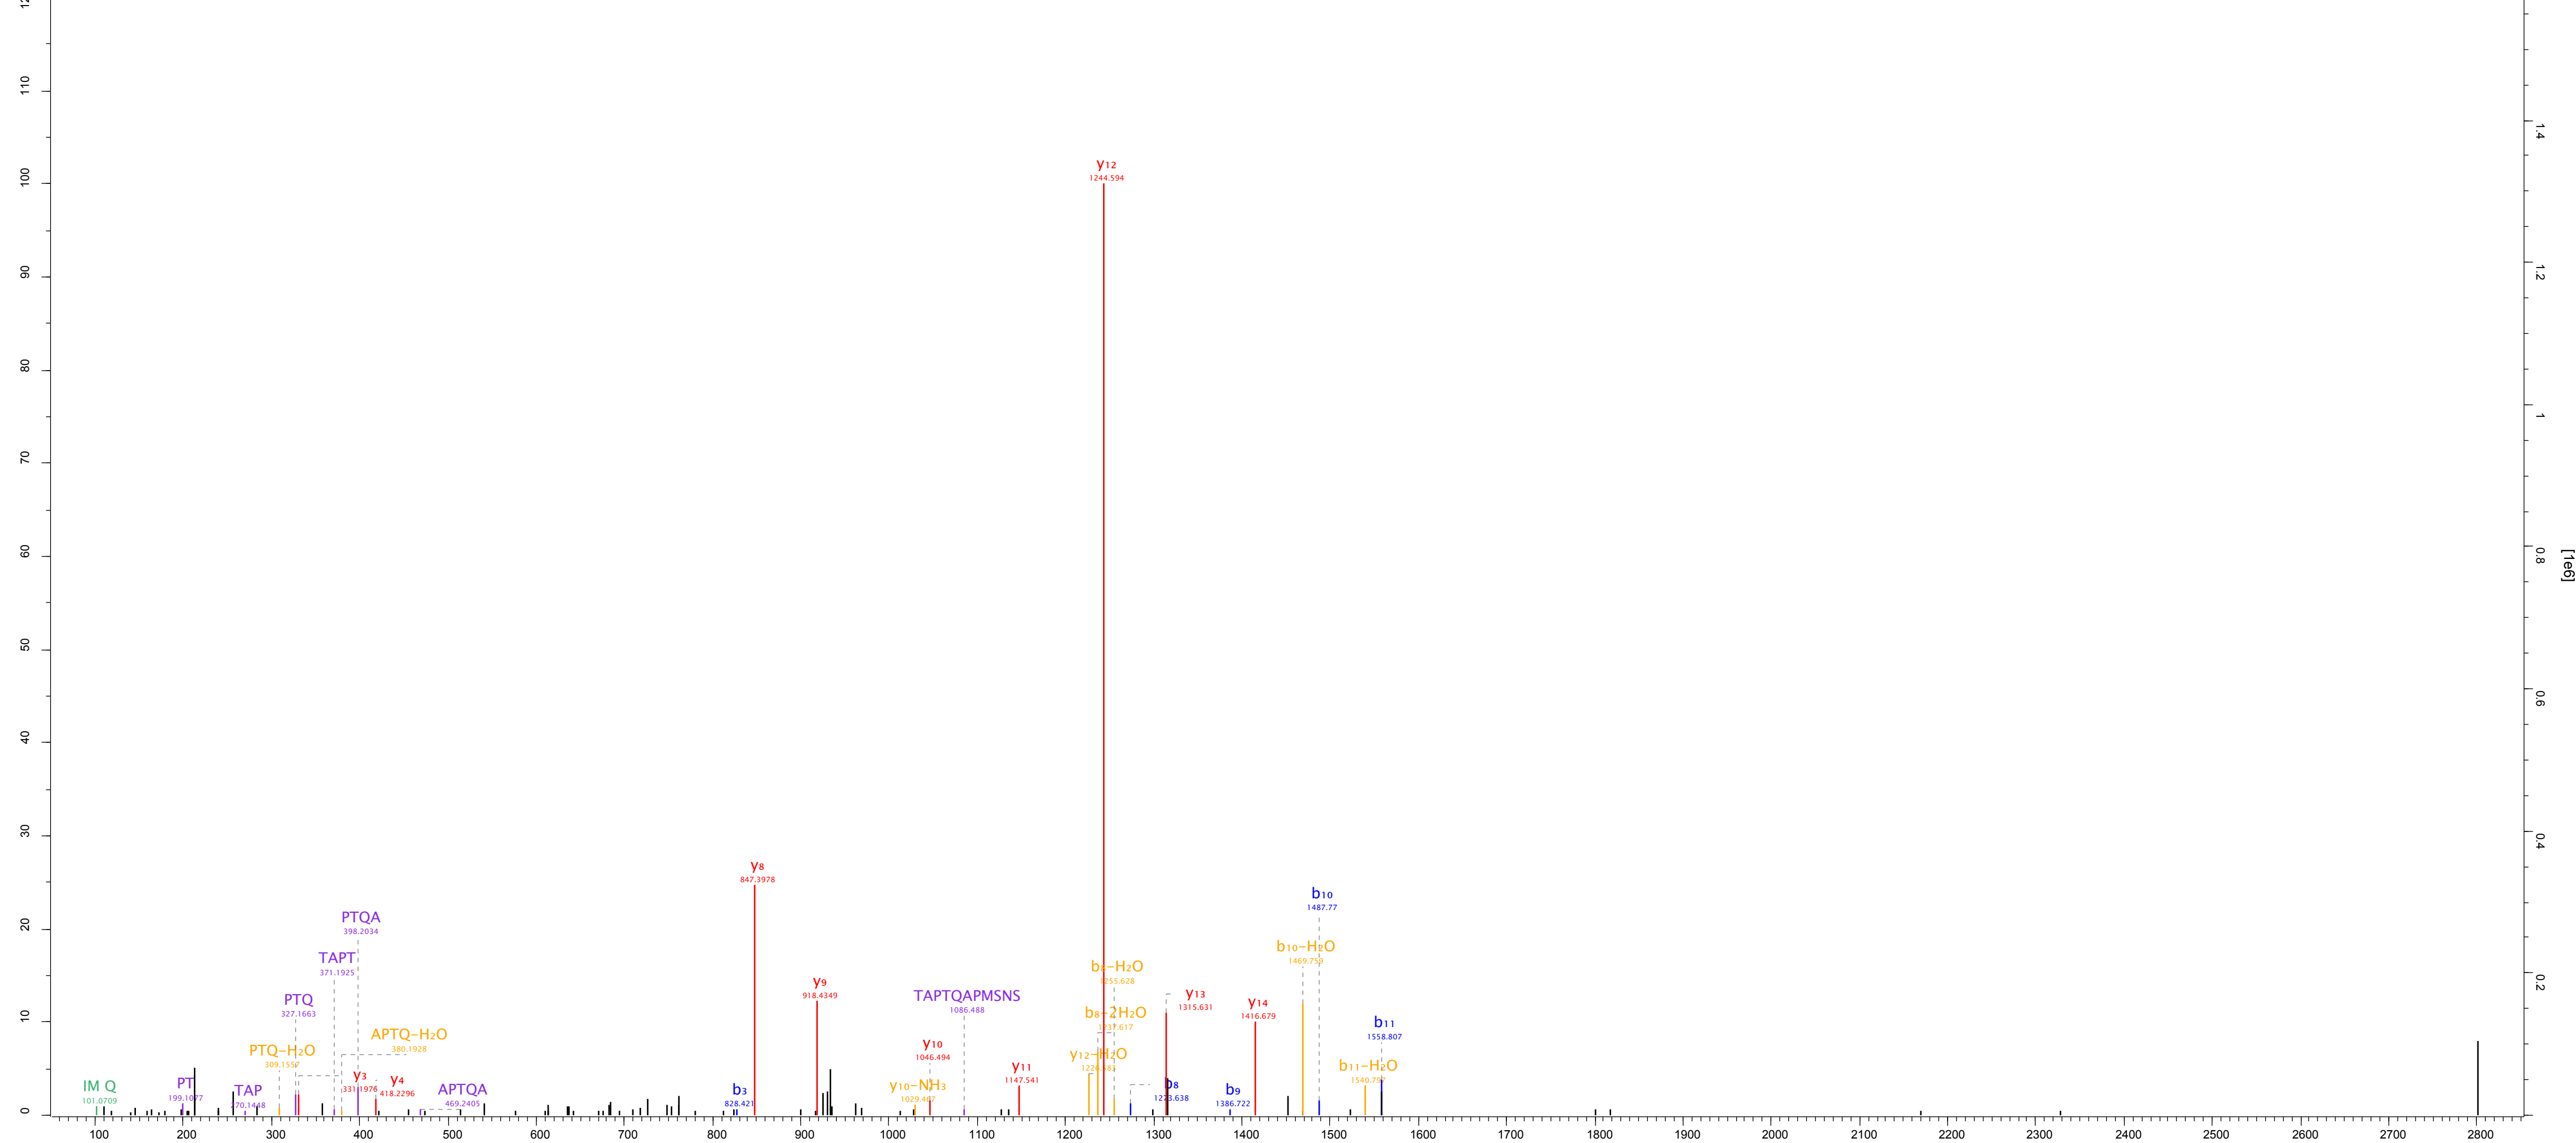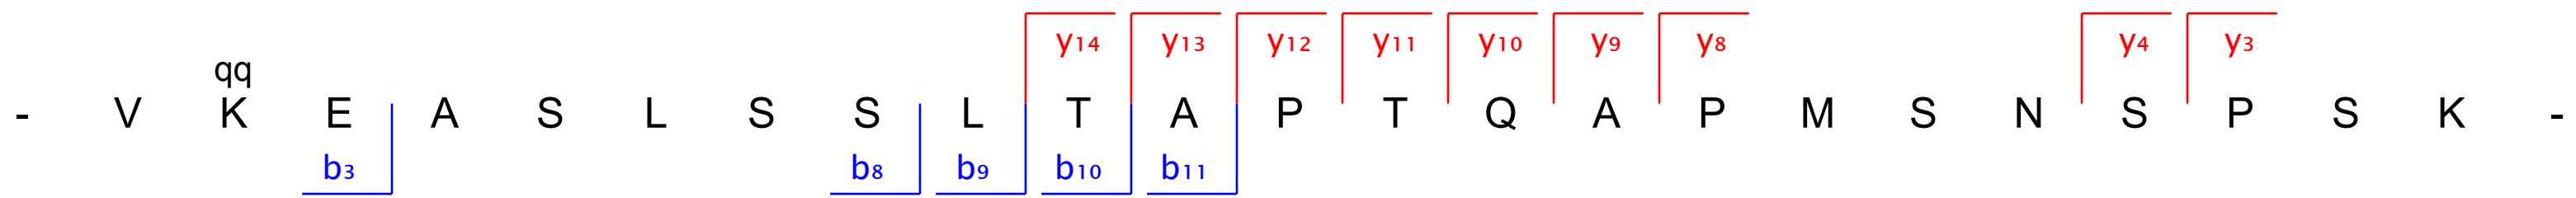

- V K qq E A S L S S L T A P T Q A P M S N S P S K -

Advanced: POLH-K494-SUMO



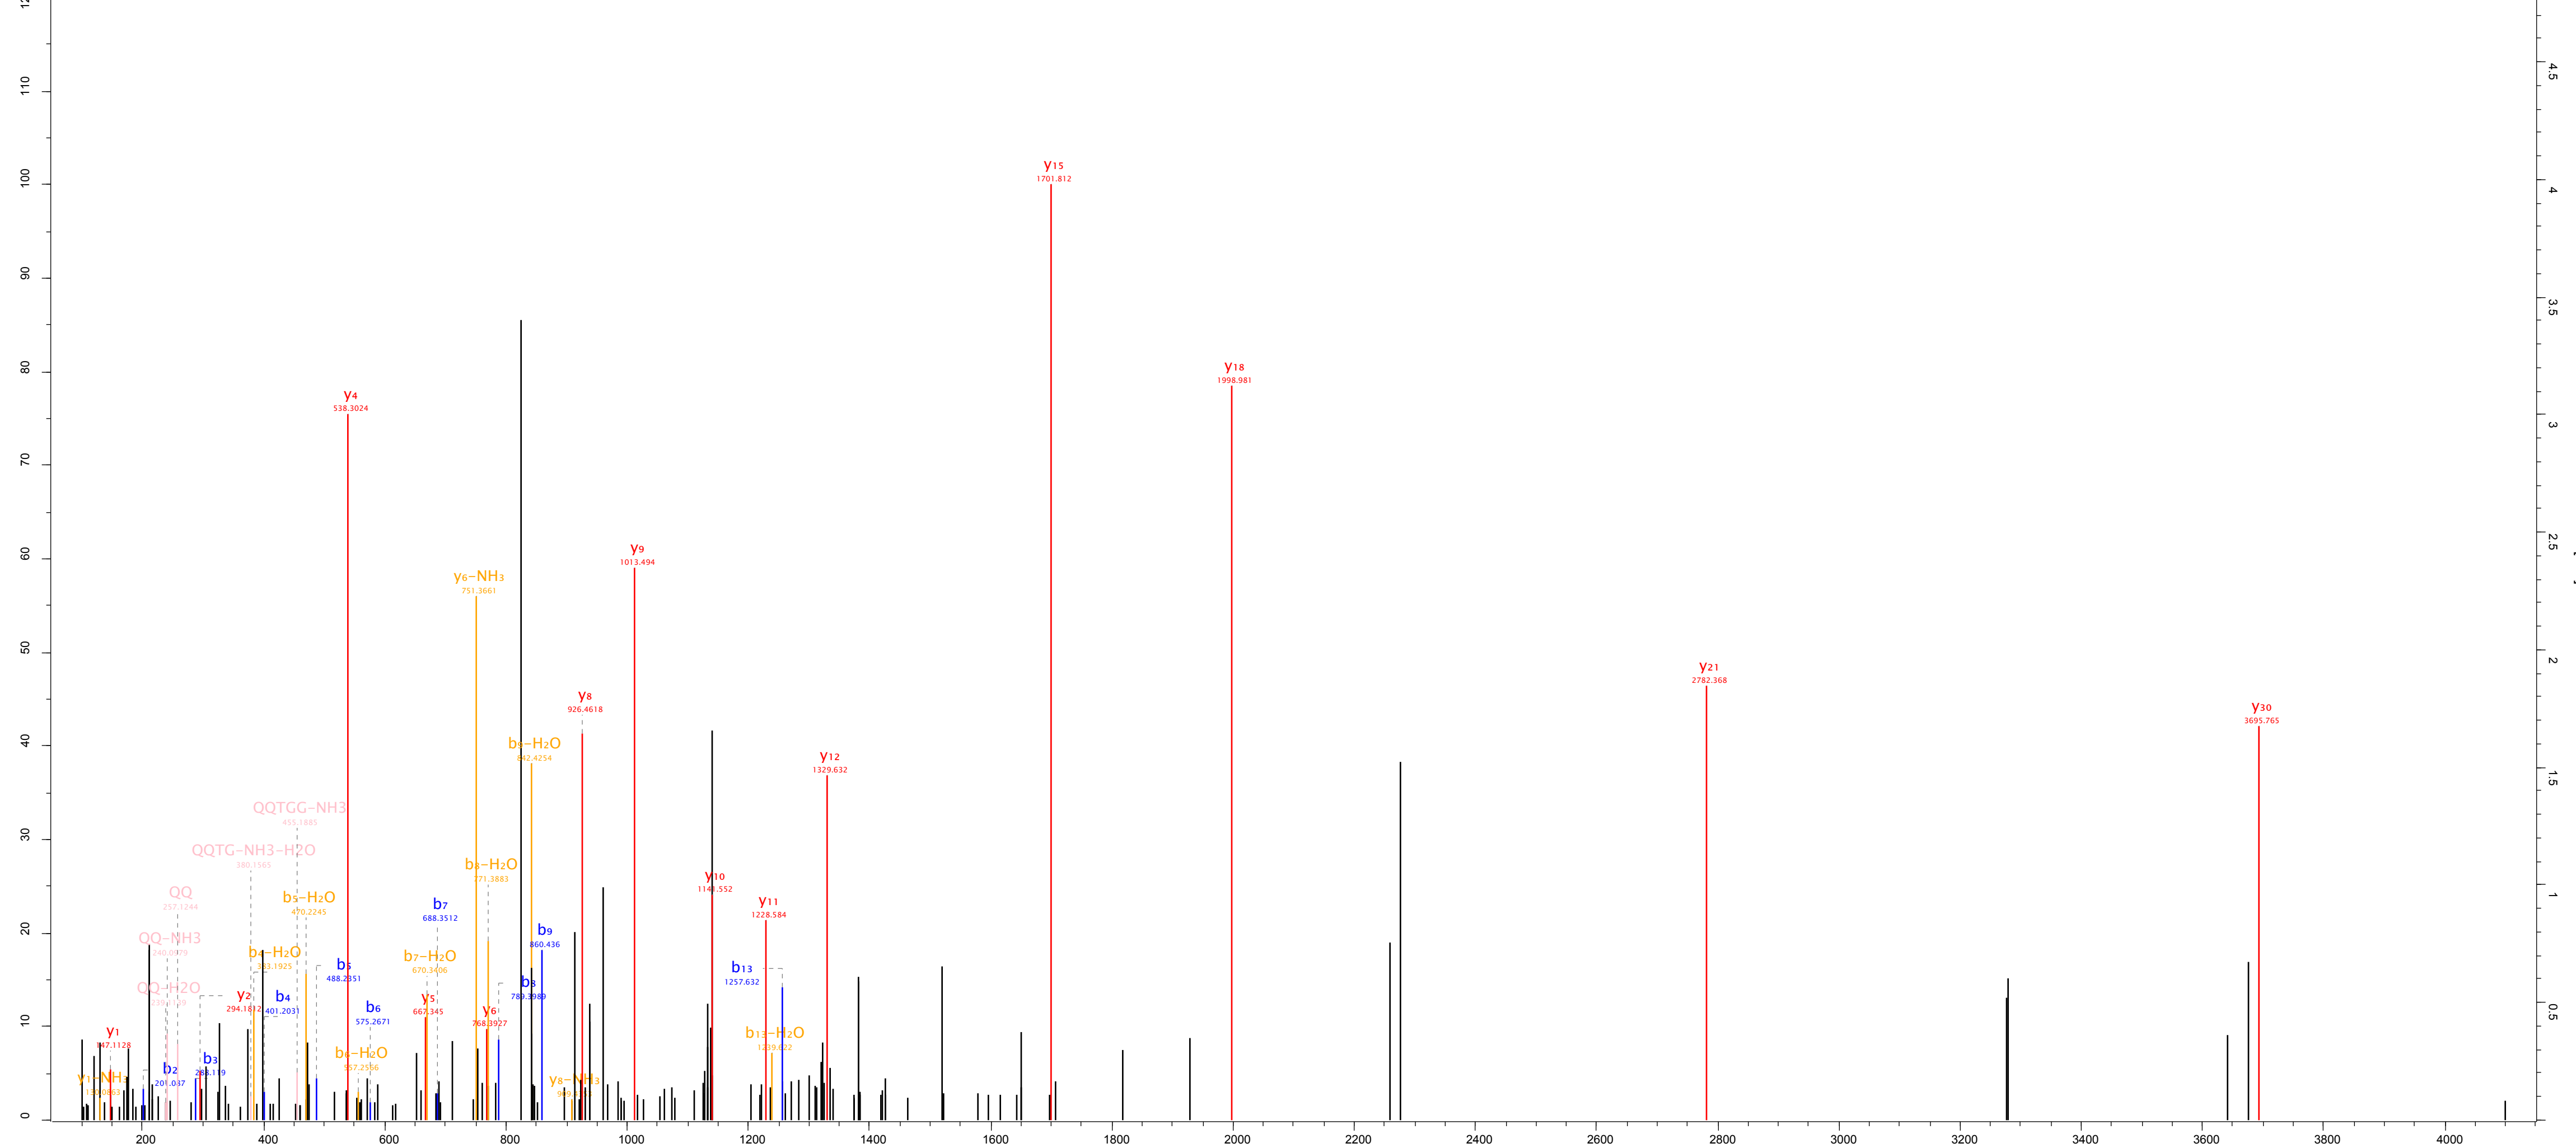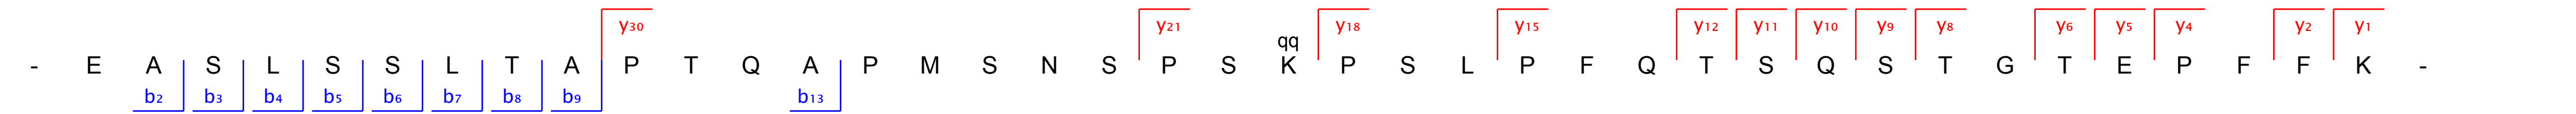

Standard: POLH-K515-SUMO

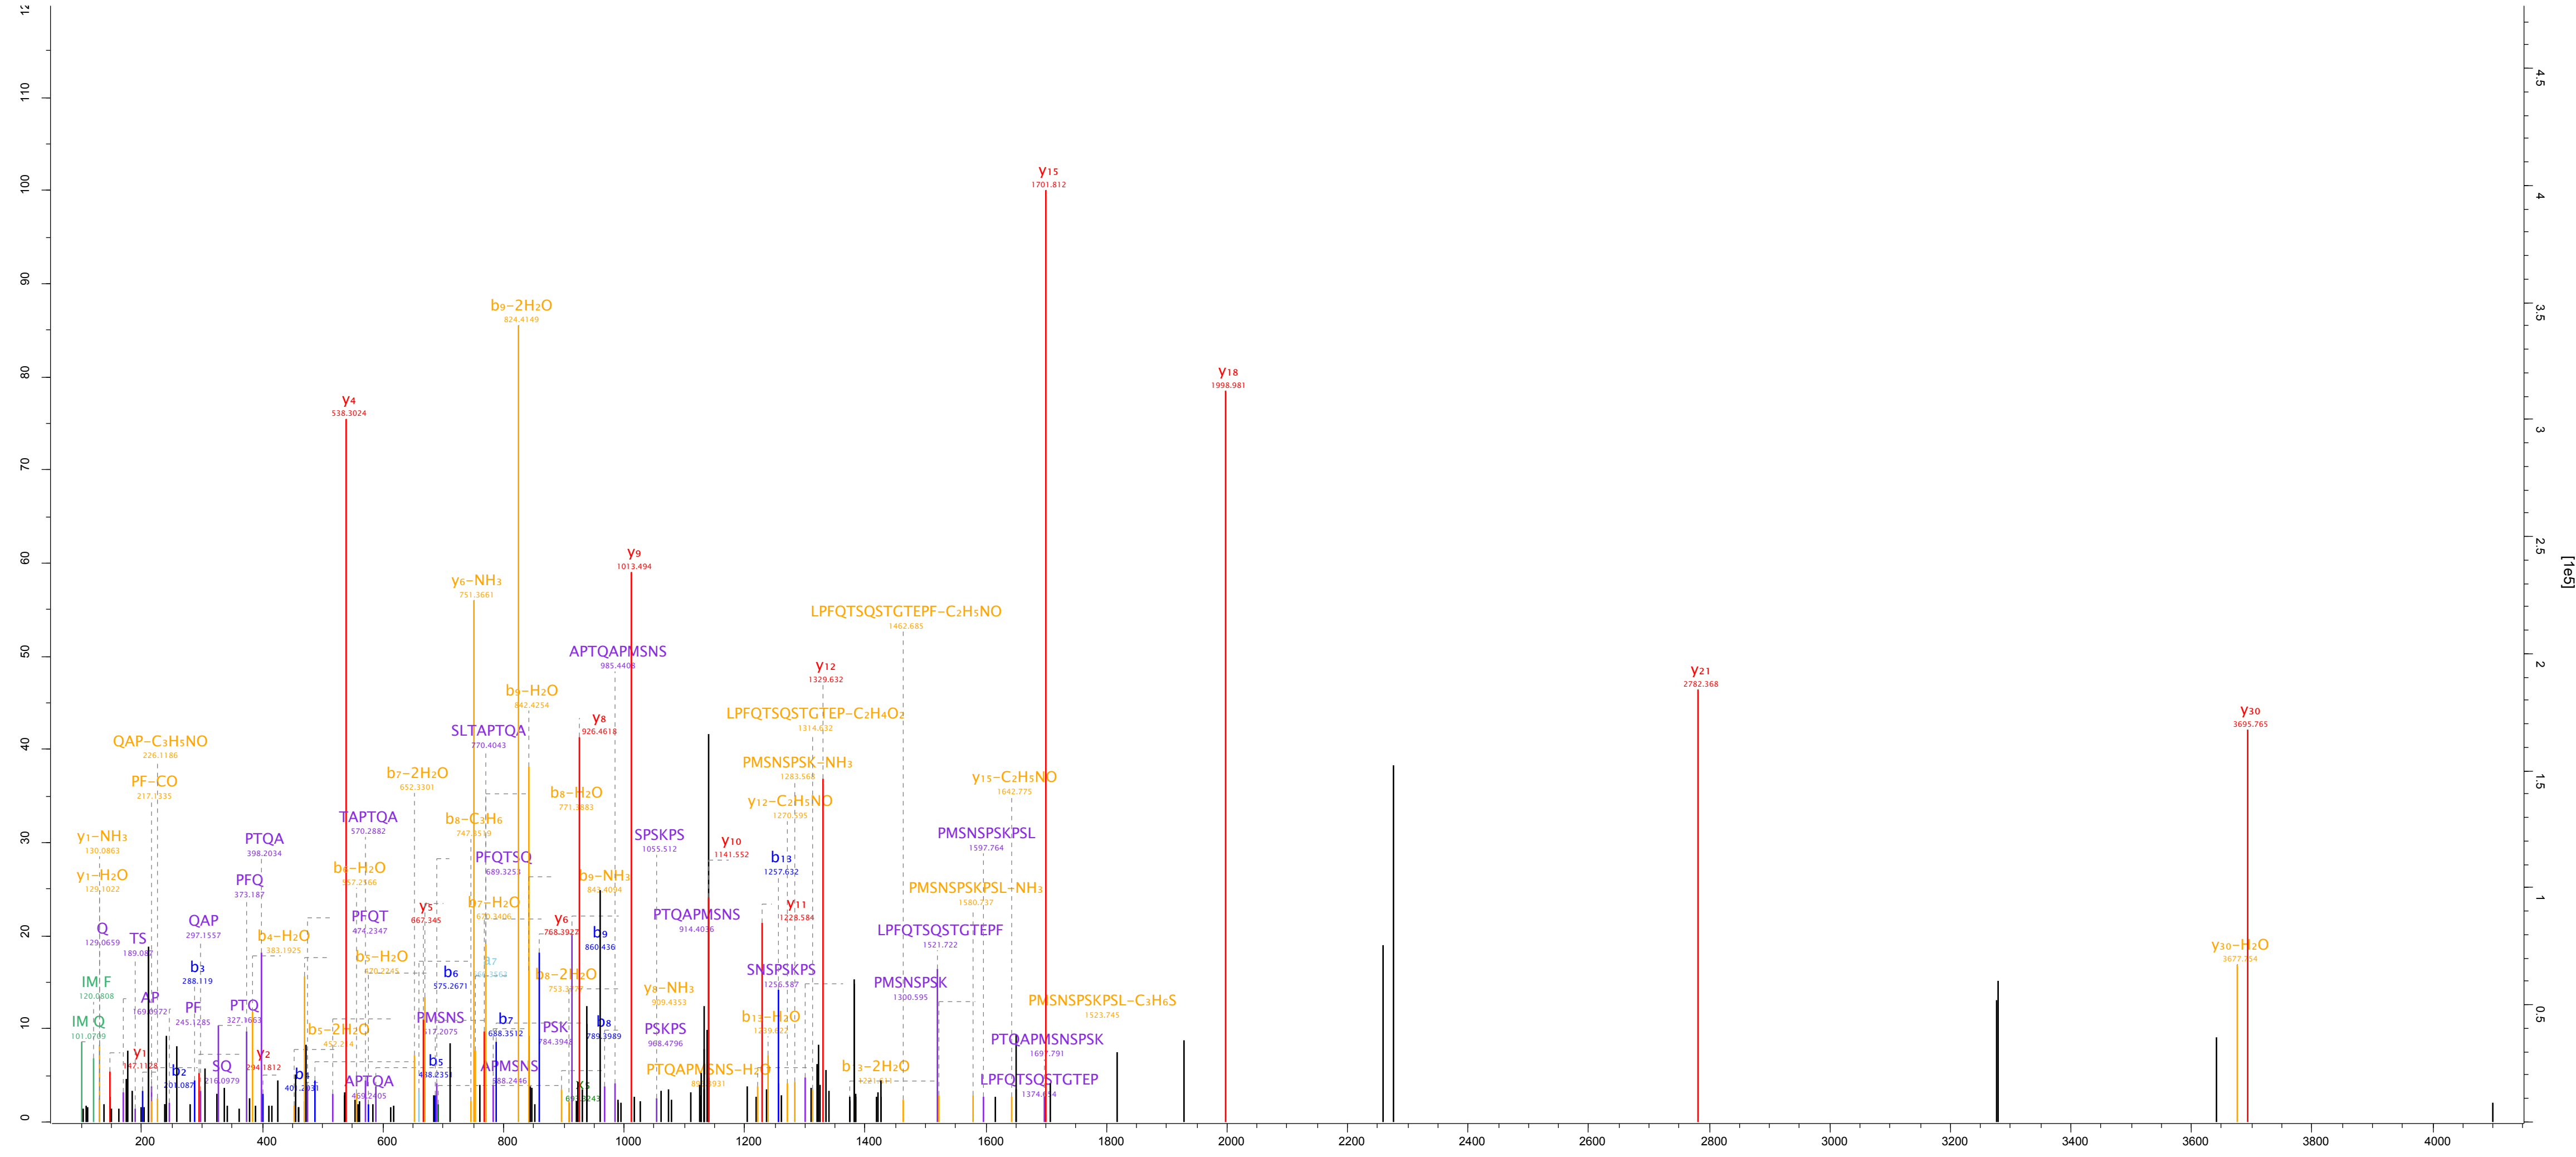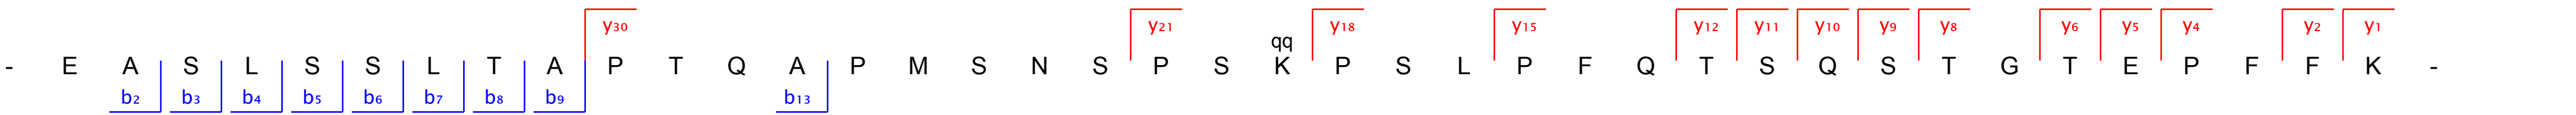

Advanced: POLH-K515-SUMO

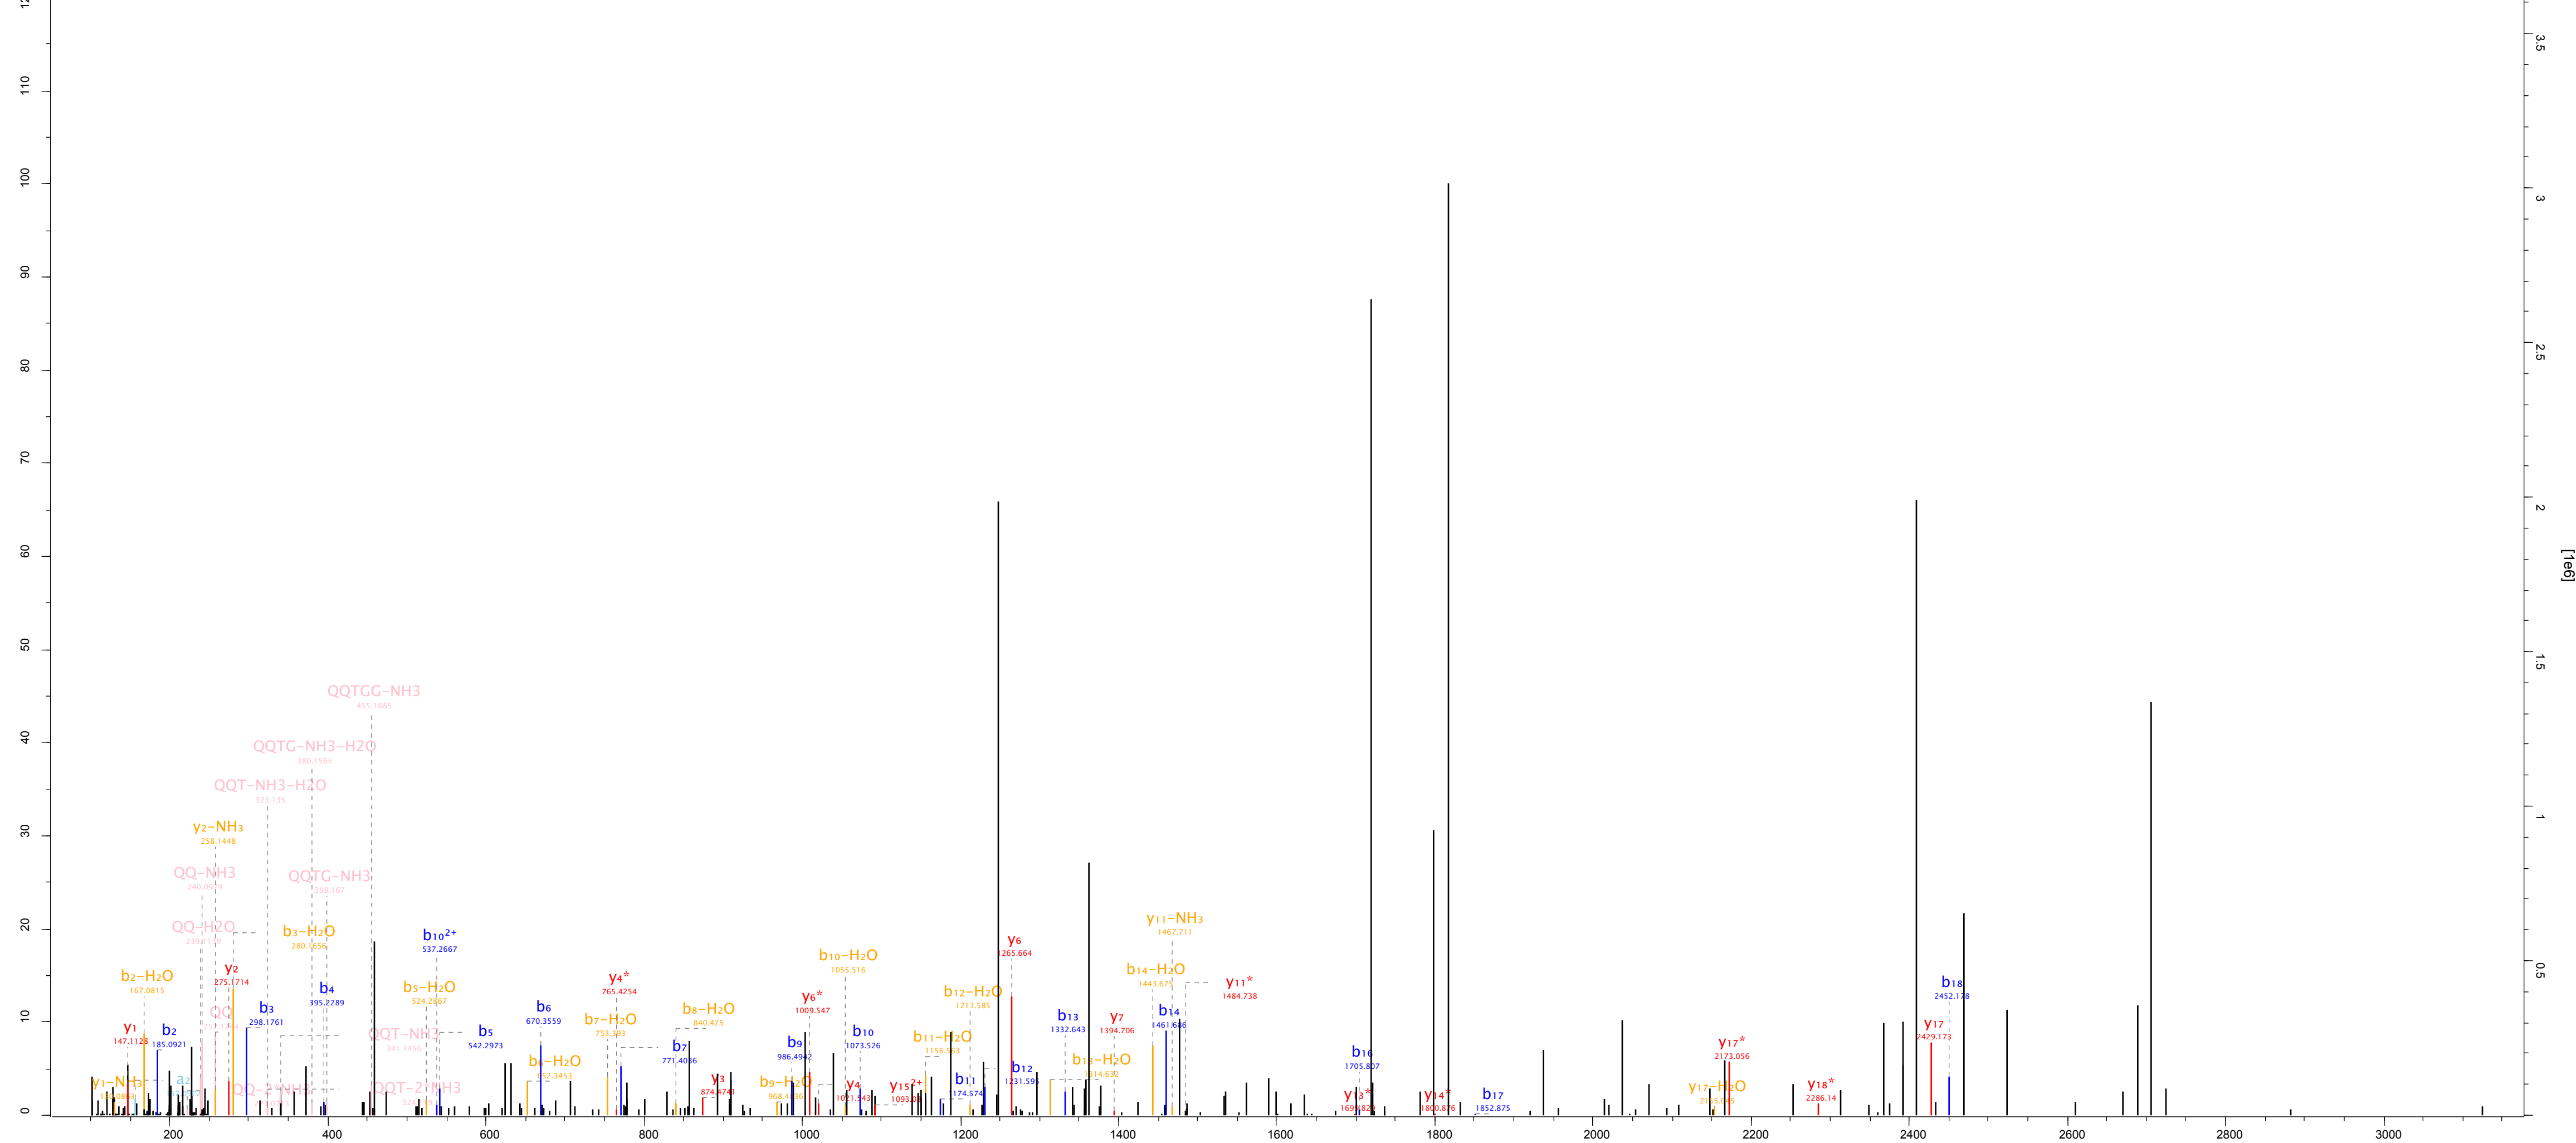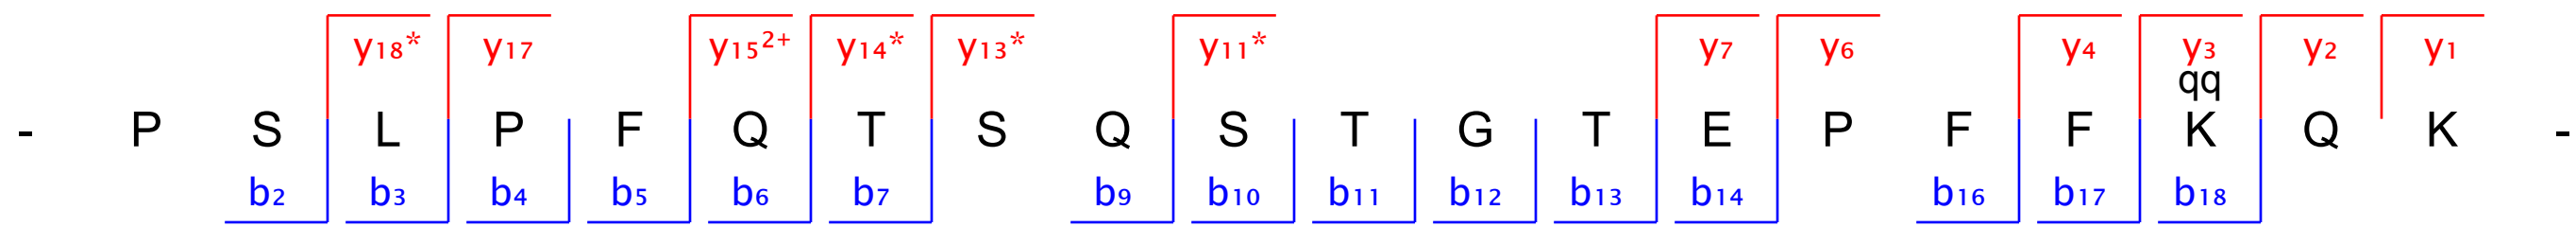

Standard: POLH-K533-SUMO

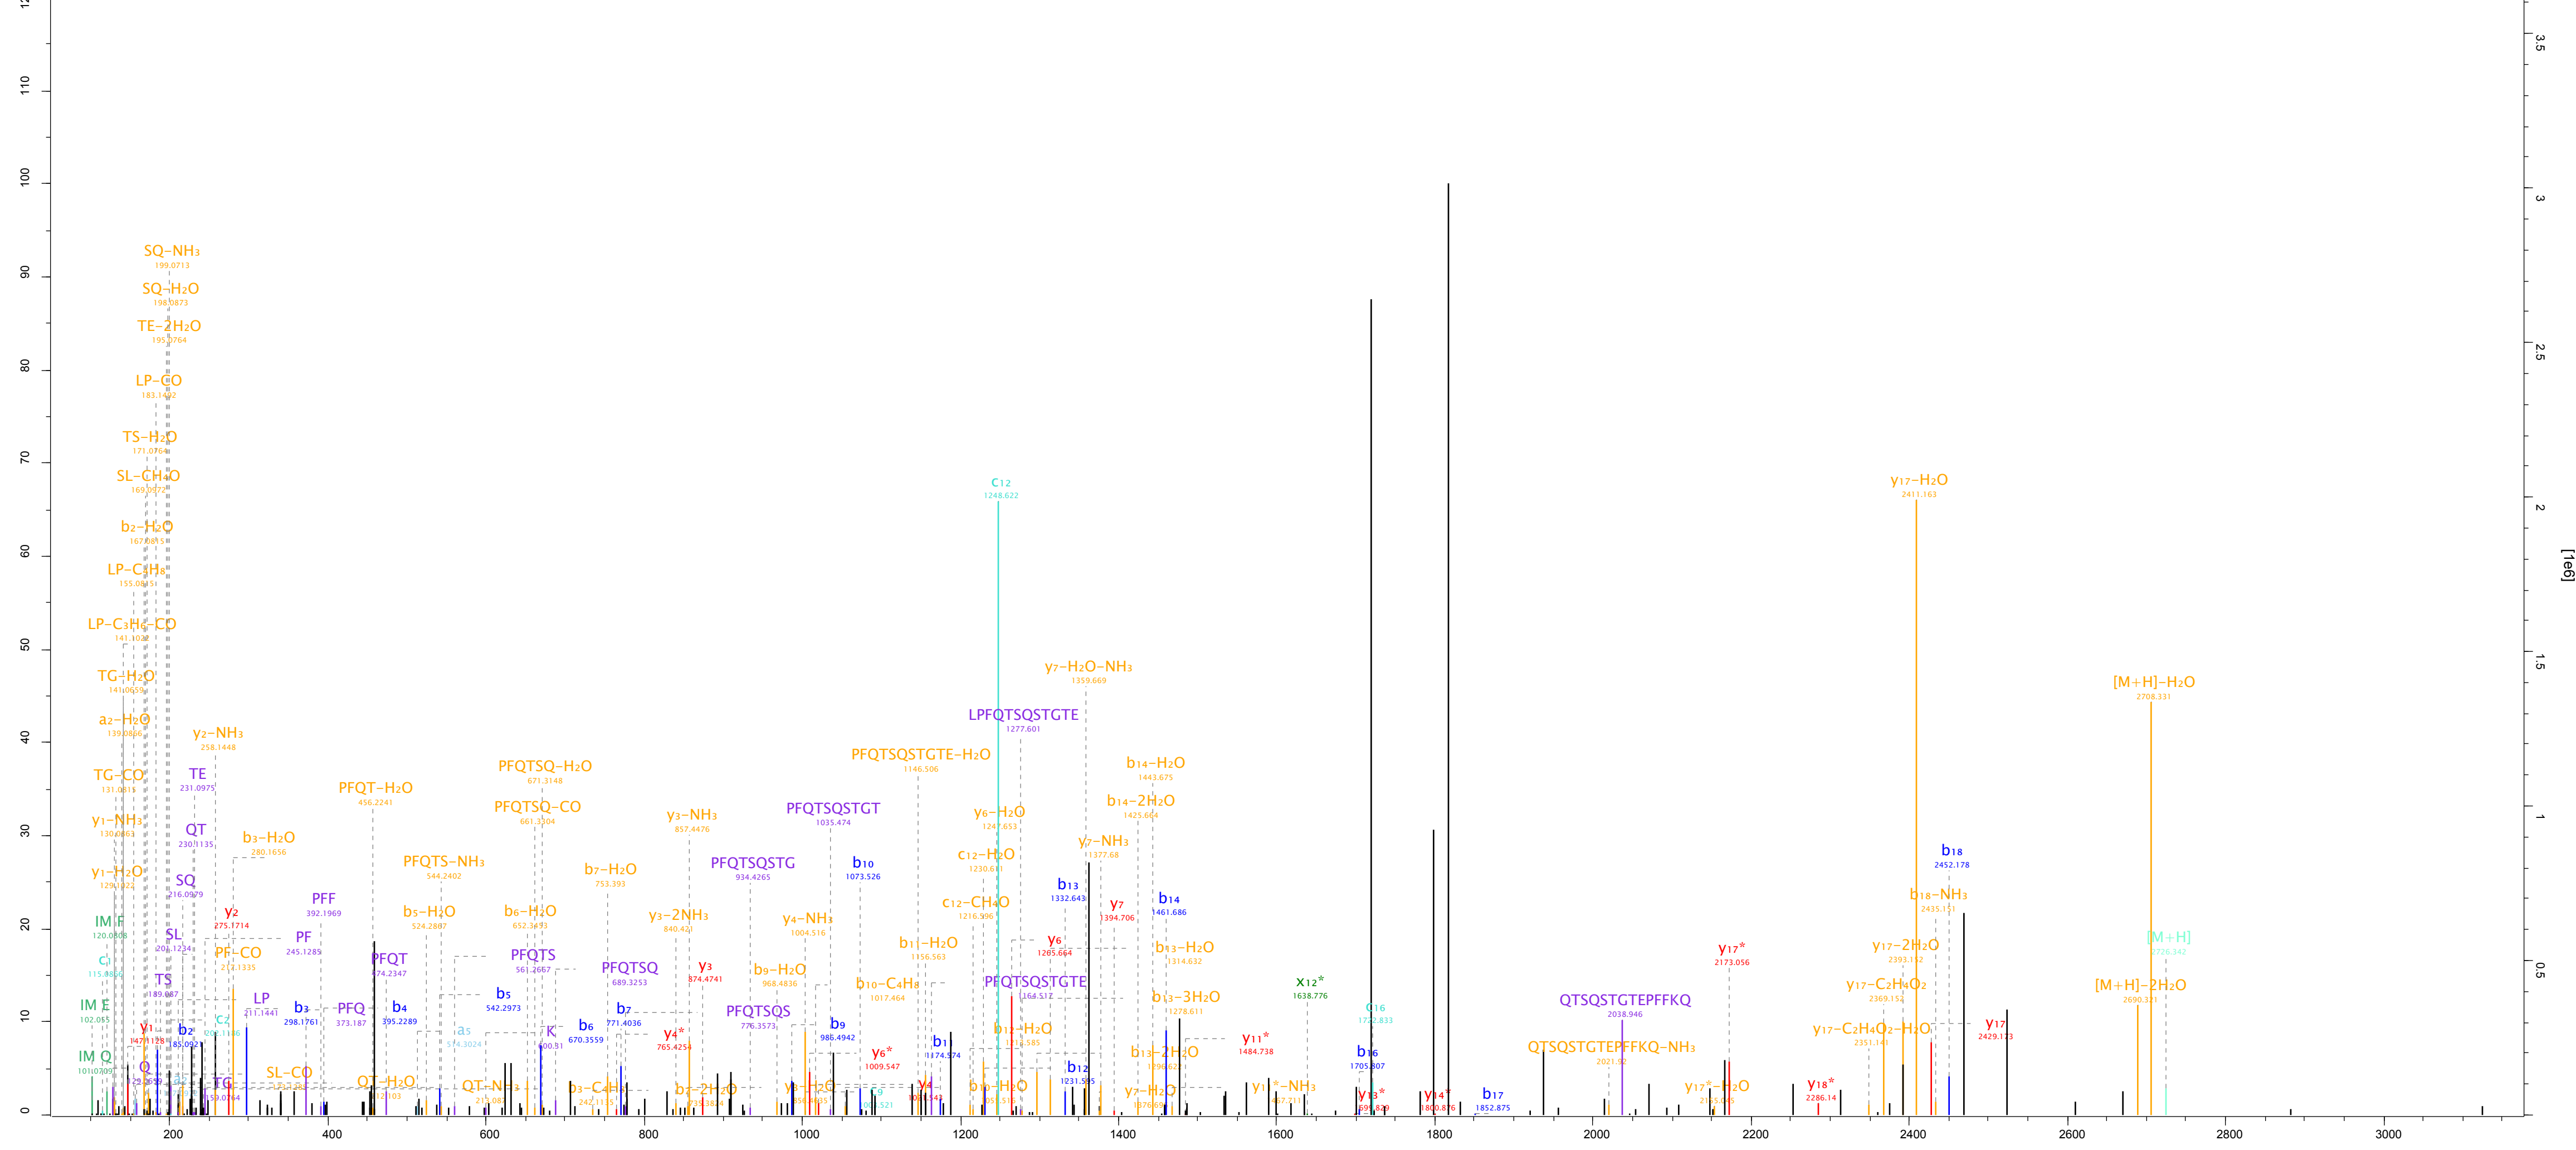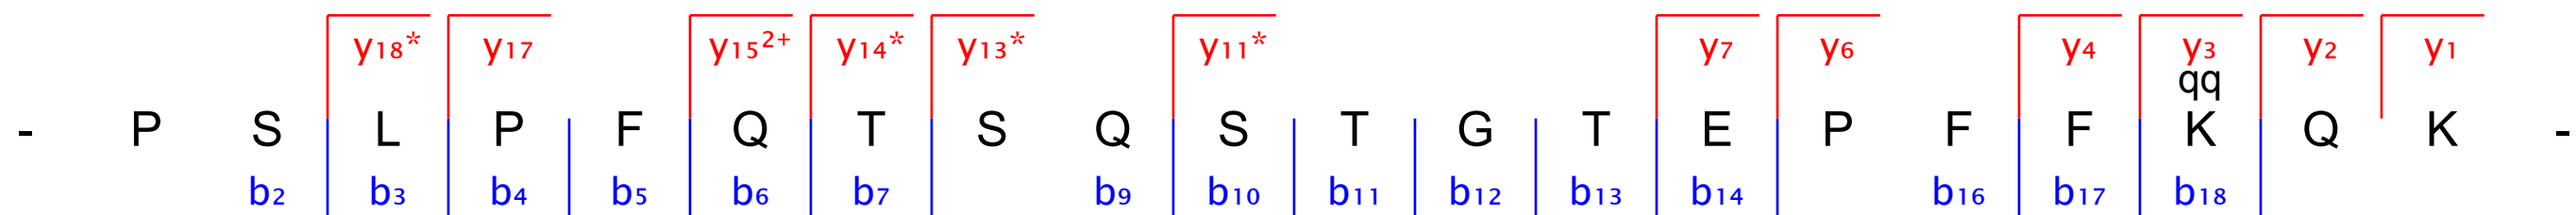

Advanced: POLH-K533-SUMO

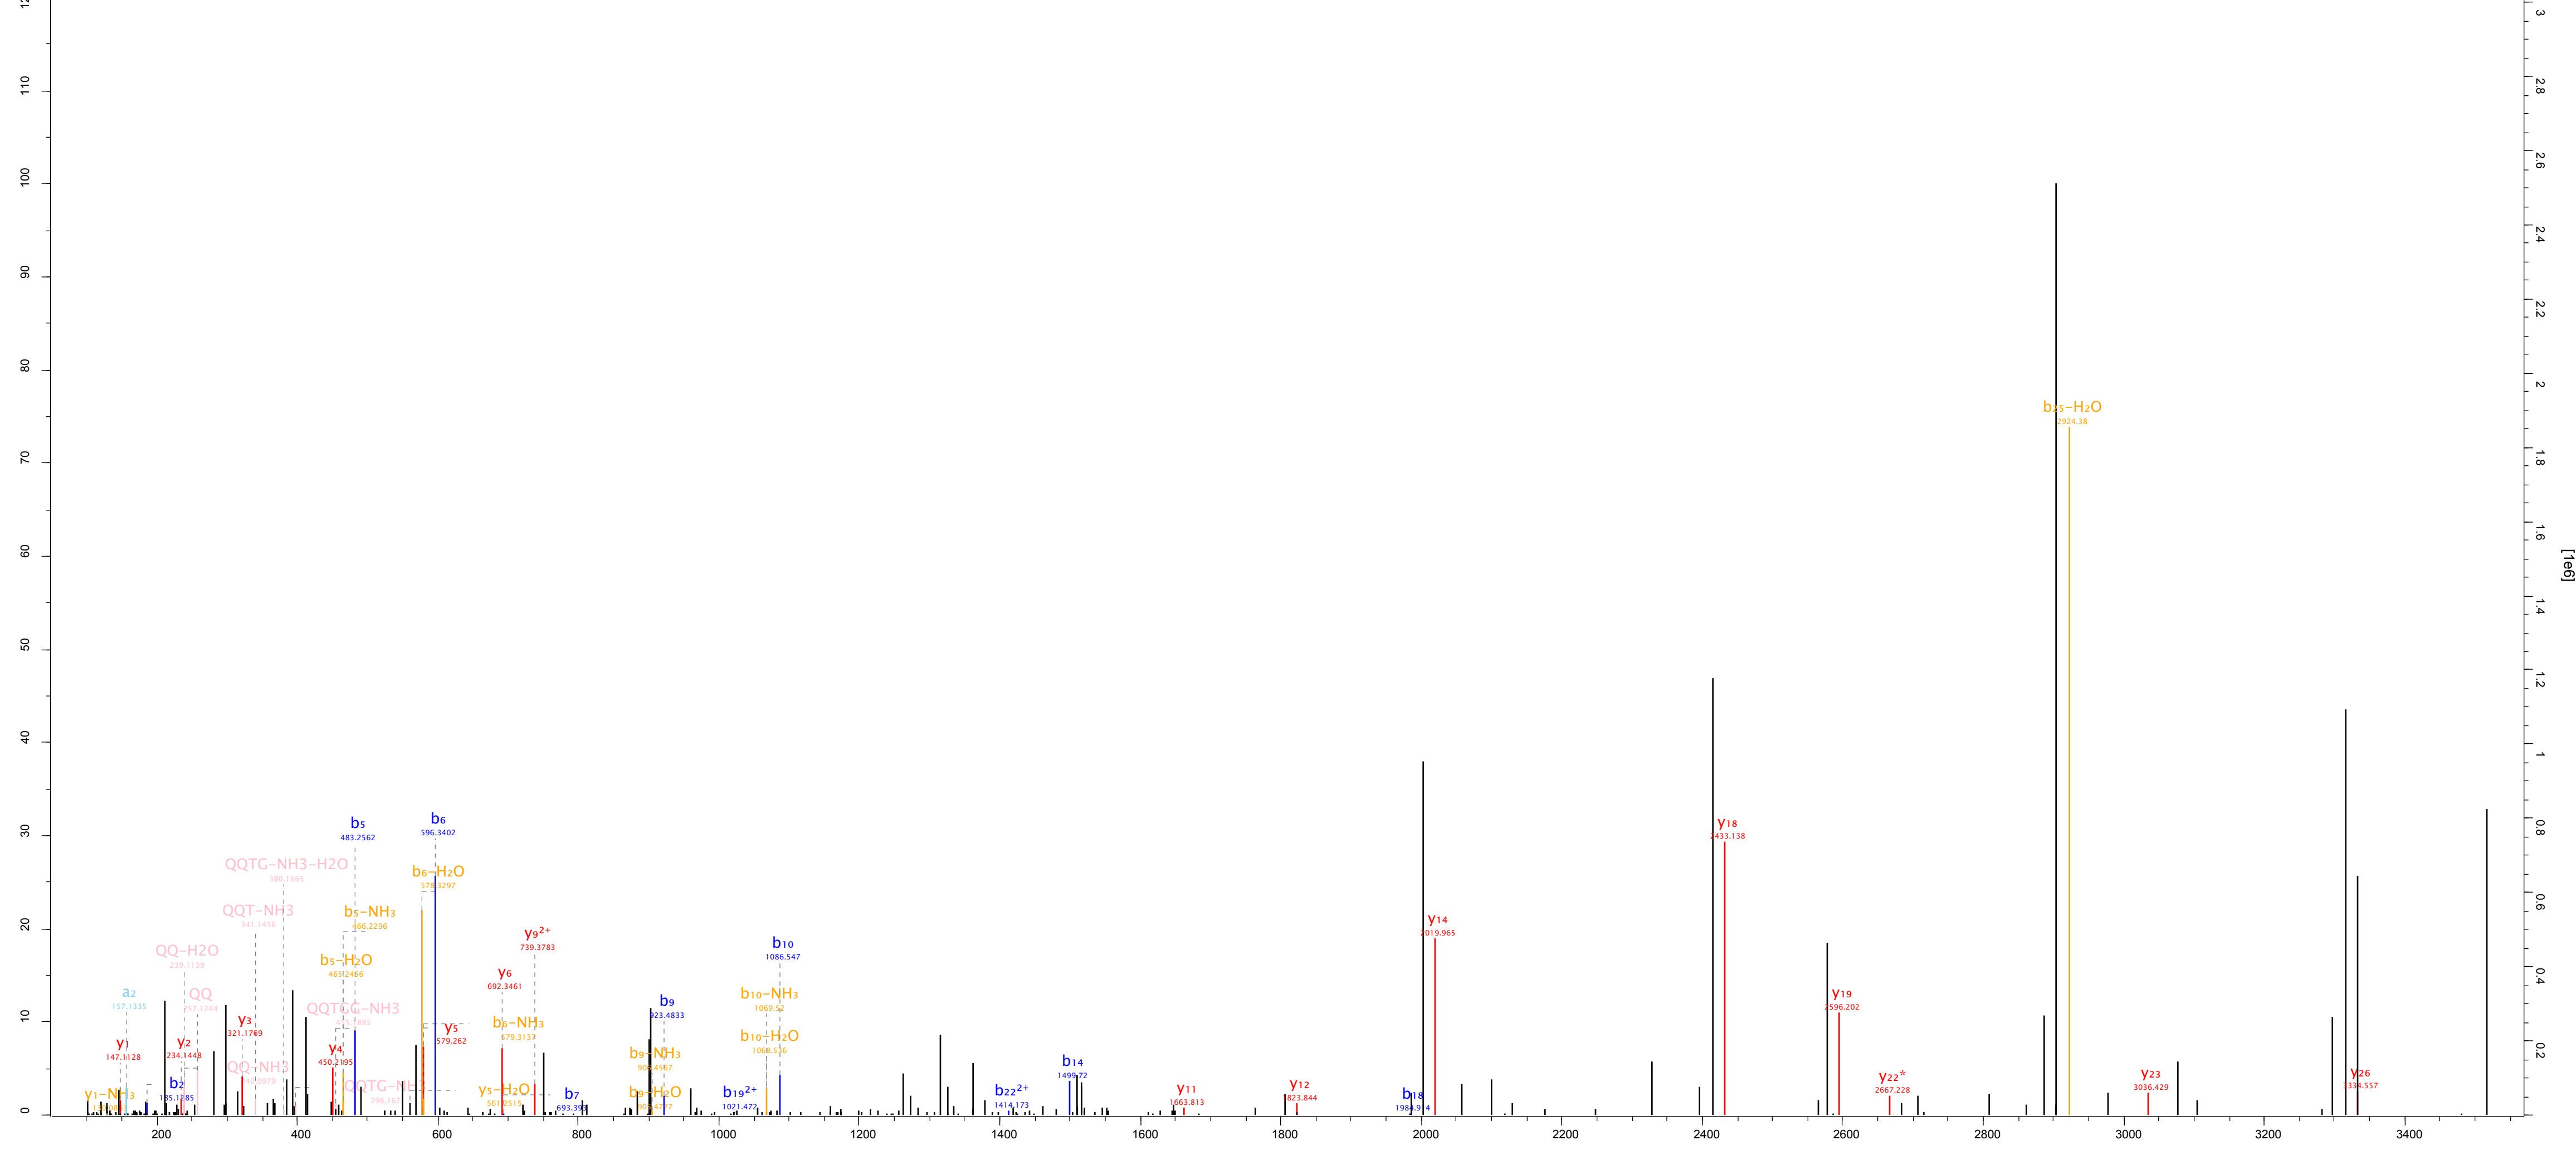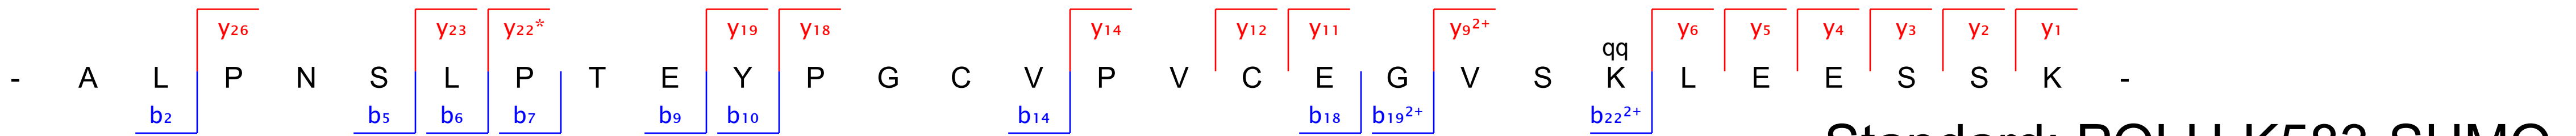

Standard: POLH-K583-SUMO

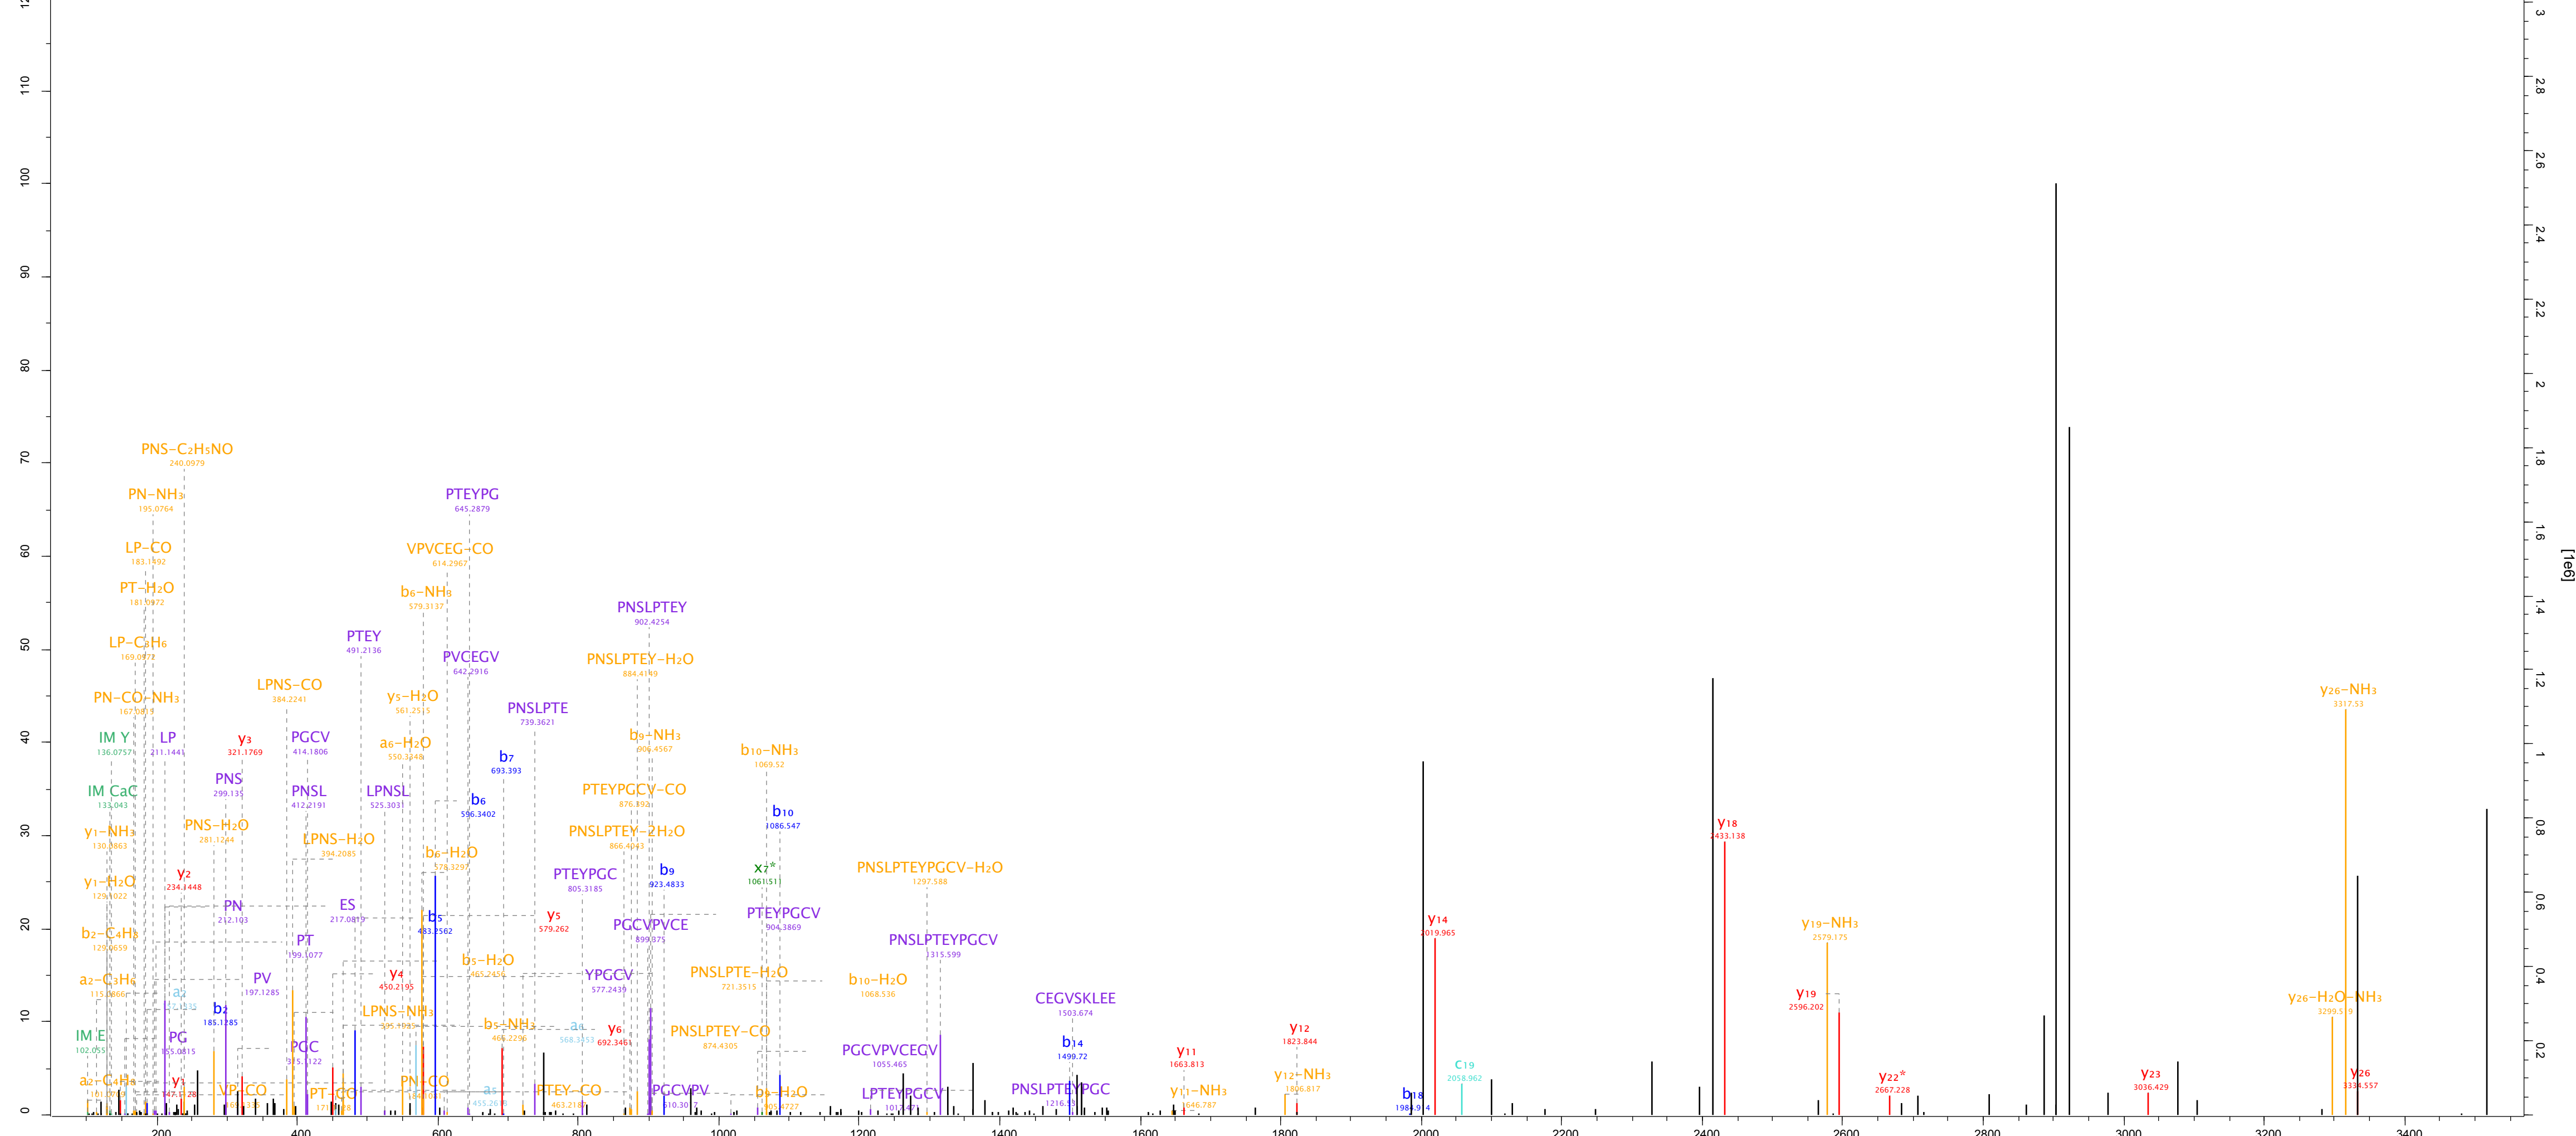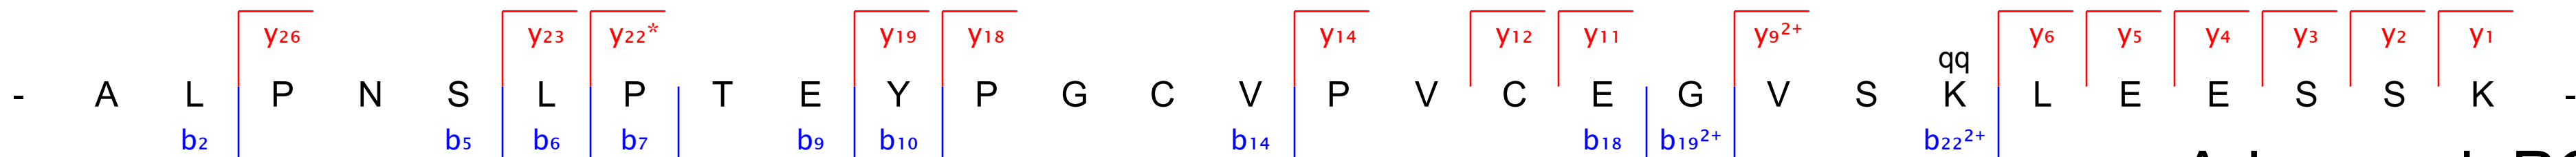

Advanced: POLH-K583-SUMO

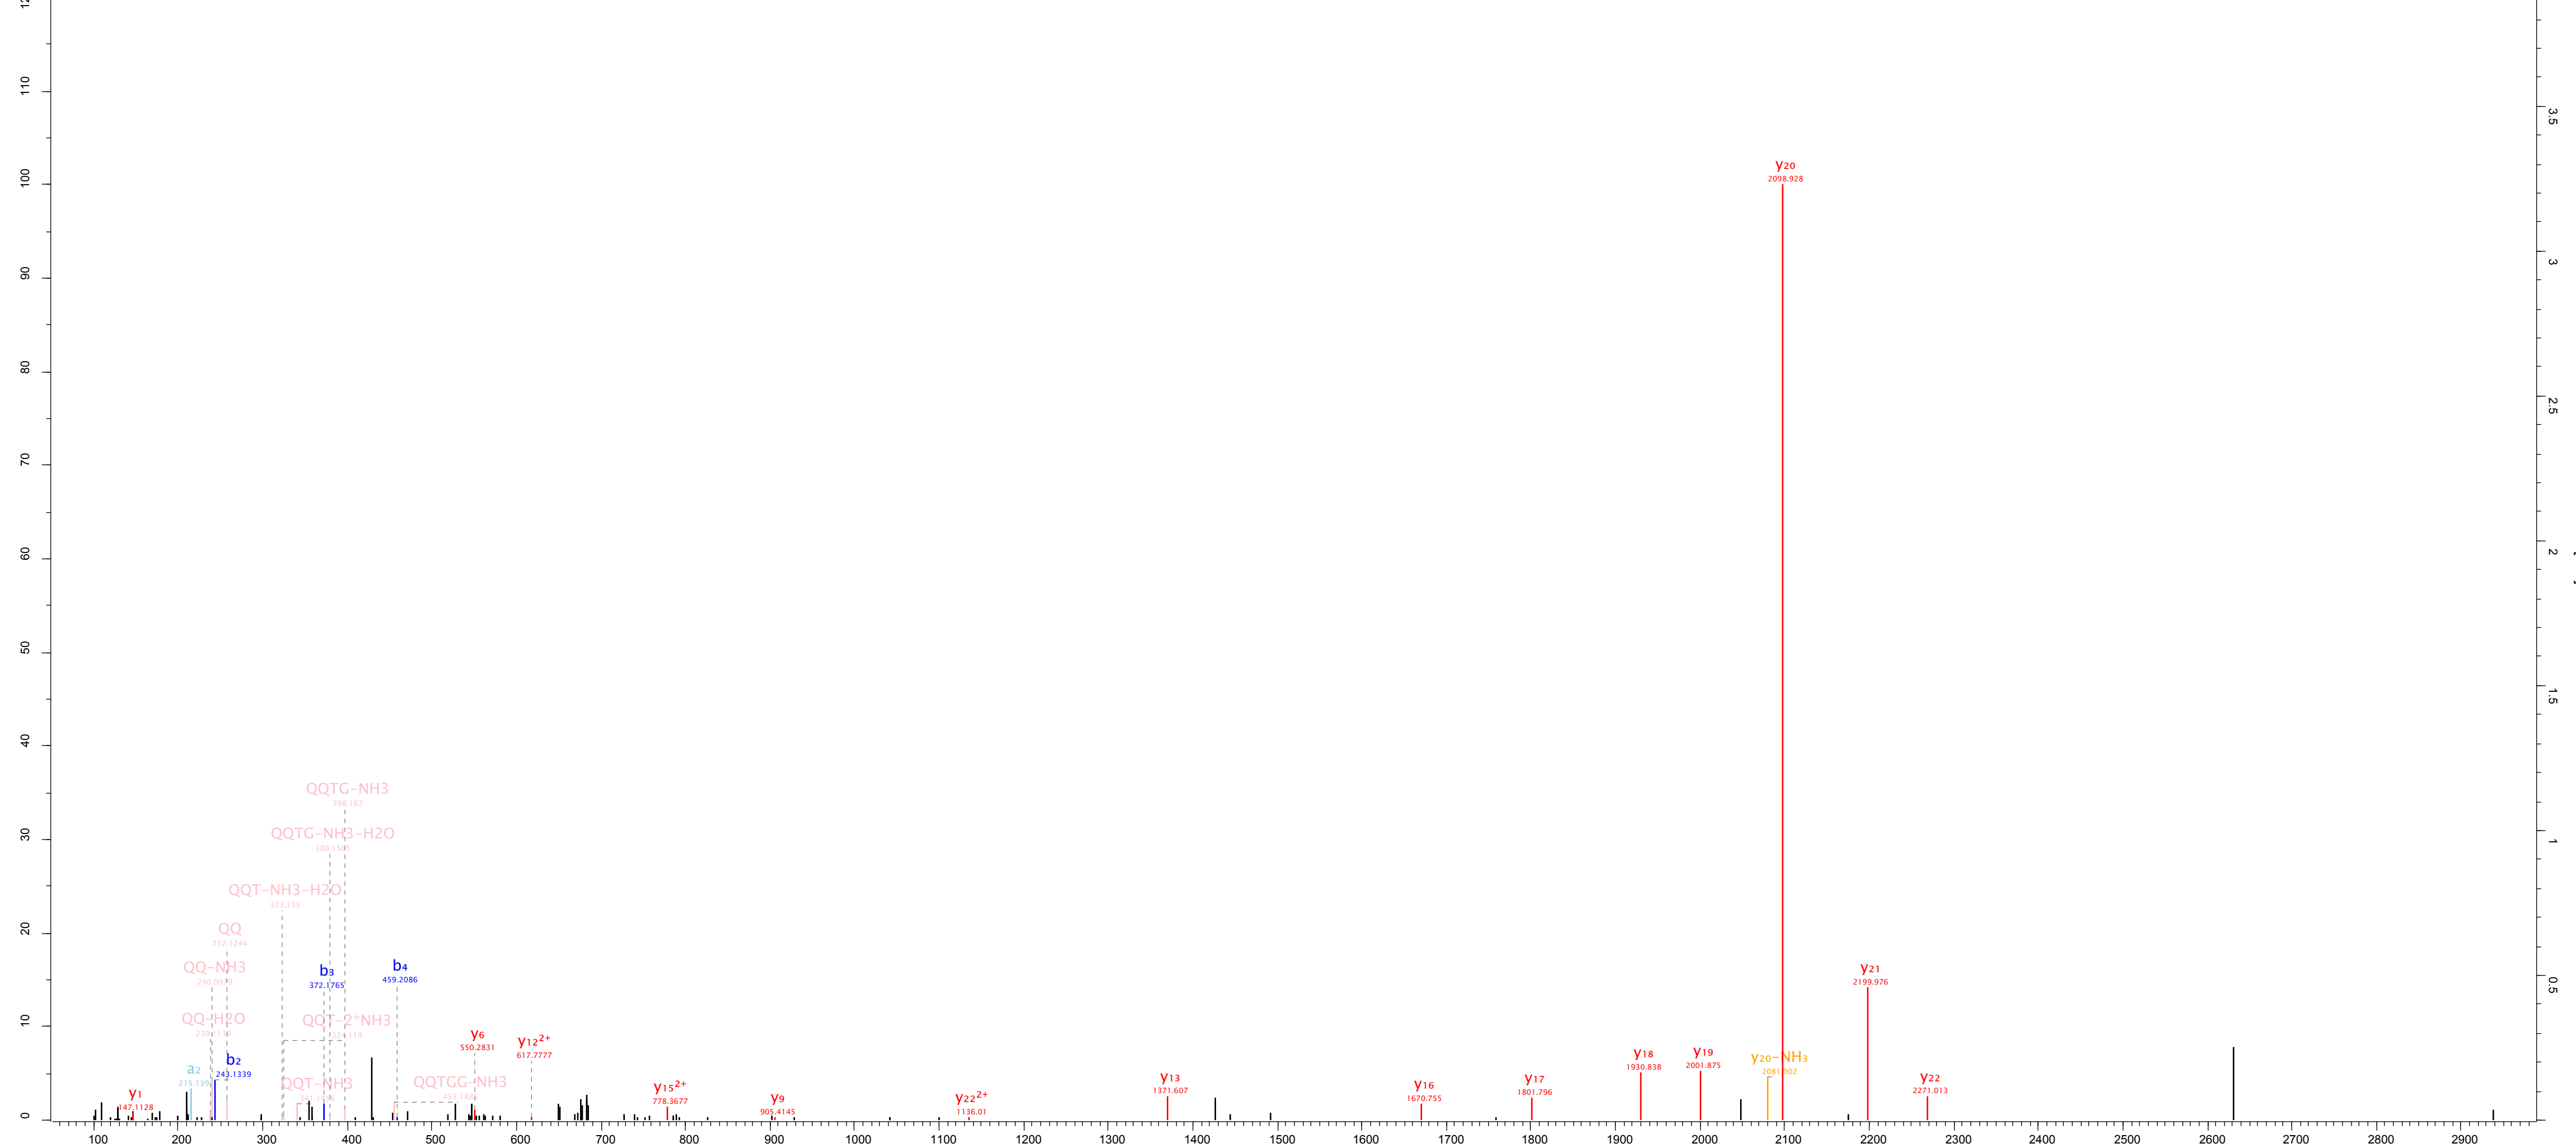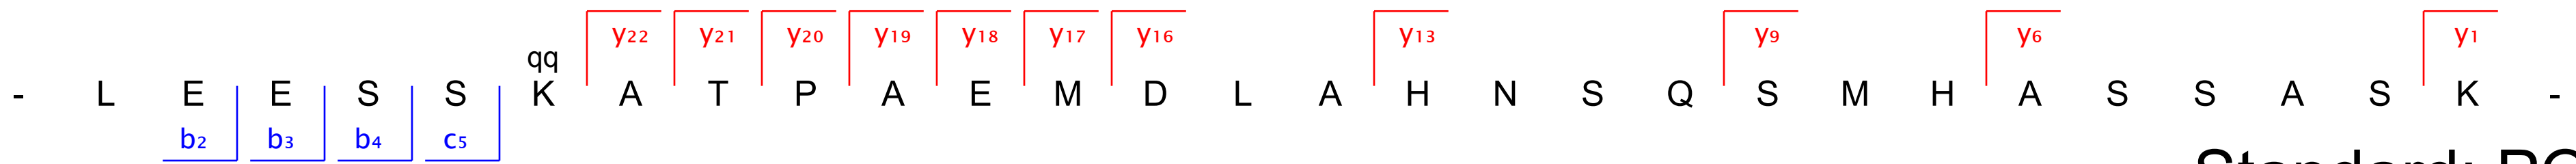

Standard: POLH-K589-SUMO

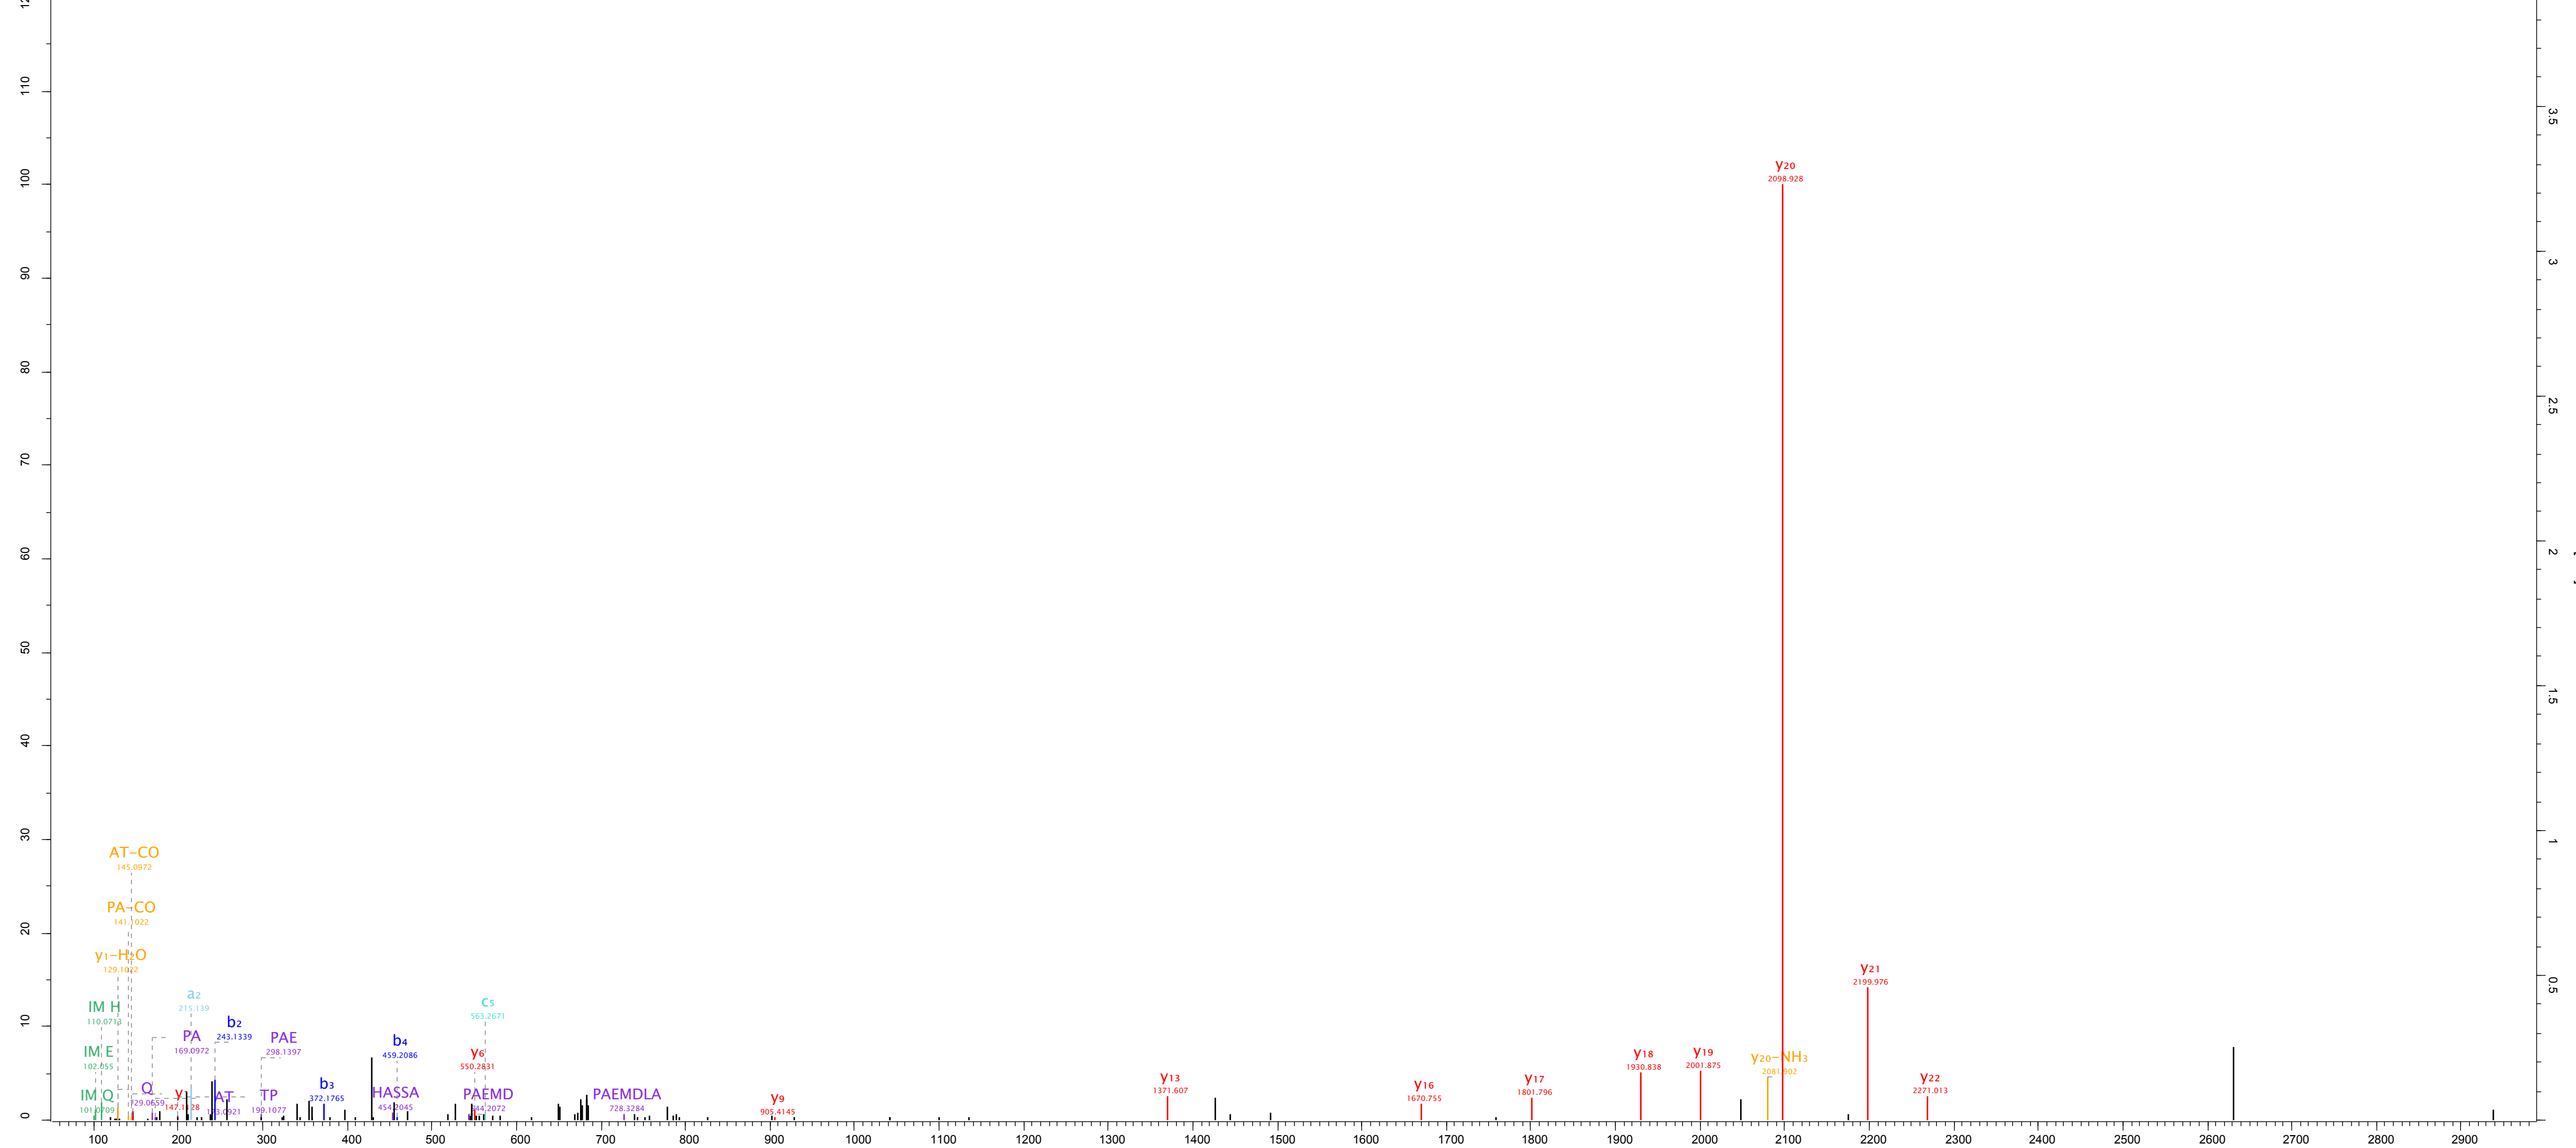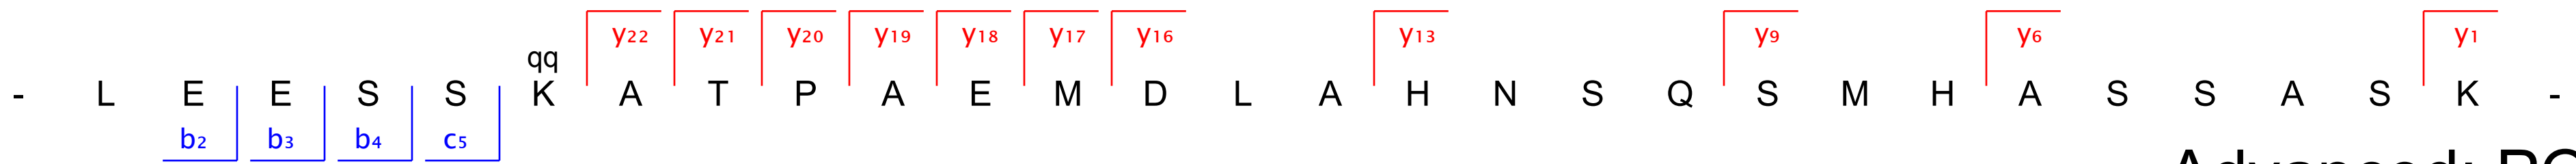

Advanced: POLH-K589-SUMO



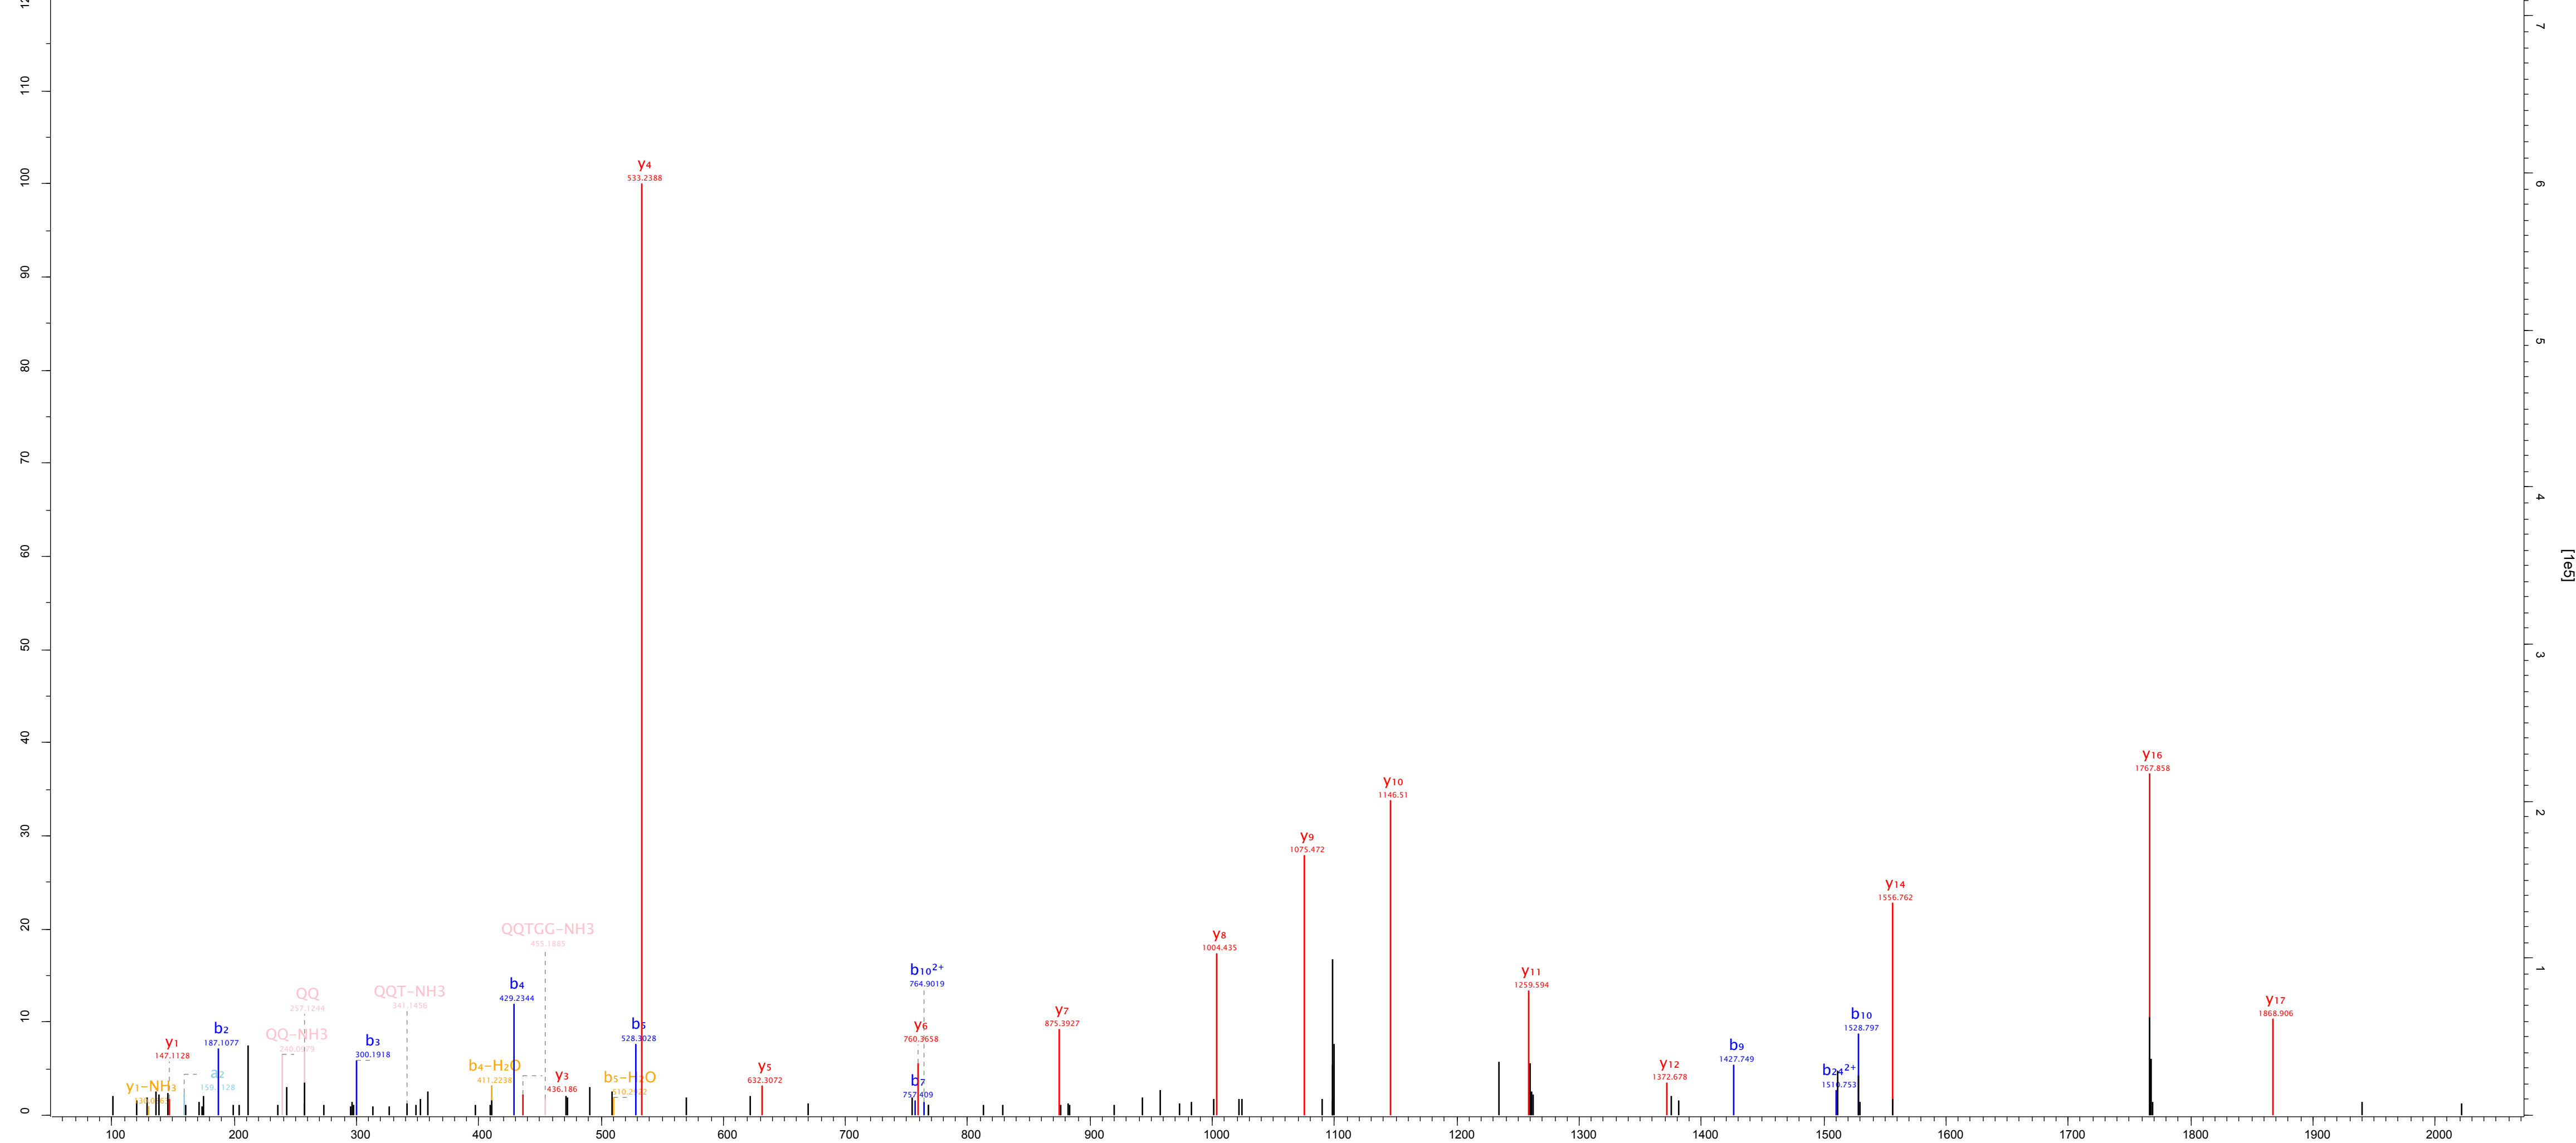

- S V L E V T Q K A T P N P S L L A A E D Q V P C E K -

b<sub>2</sub> b<sub>3</sub> b<sub>4</sub> b<sub>5</sub> b<sub>7</sub> b<sub>9</sub> b<sub>10</sub>

y<sub>1</sub> y<sub>3</sub> y<sub>4</sub> y<sub>5</sub> y<sub>6</sub> y<sub>7</sub> y<sub>8</sub> y<sub>9</sub> y<sub>10</sub> y<sub>11</sub> y<sub>12</sub> y<sub>14</sub> y<sub>16</sub> y<sub>17</sub>

Standard: POLH-K619-SUMO

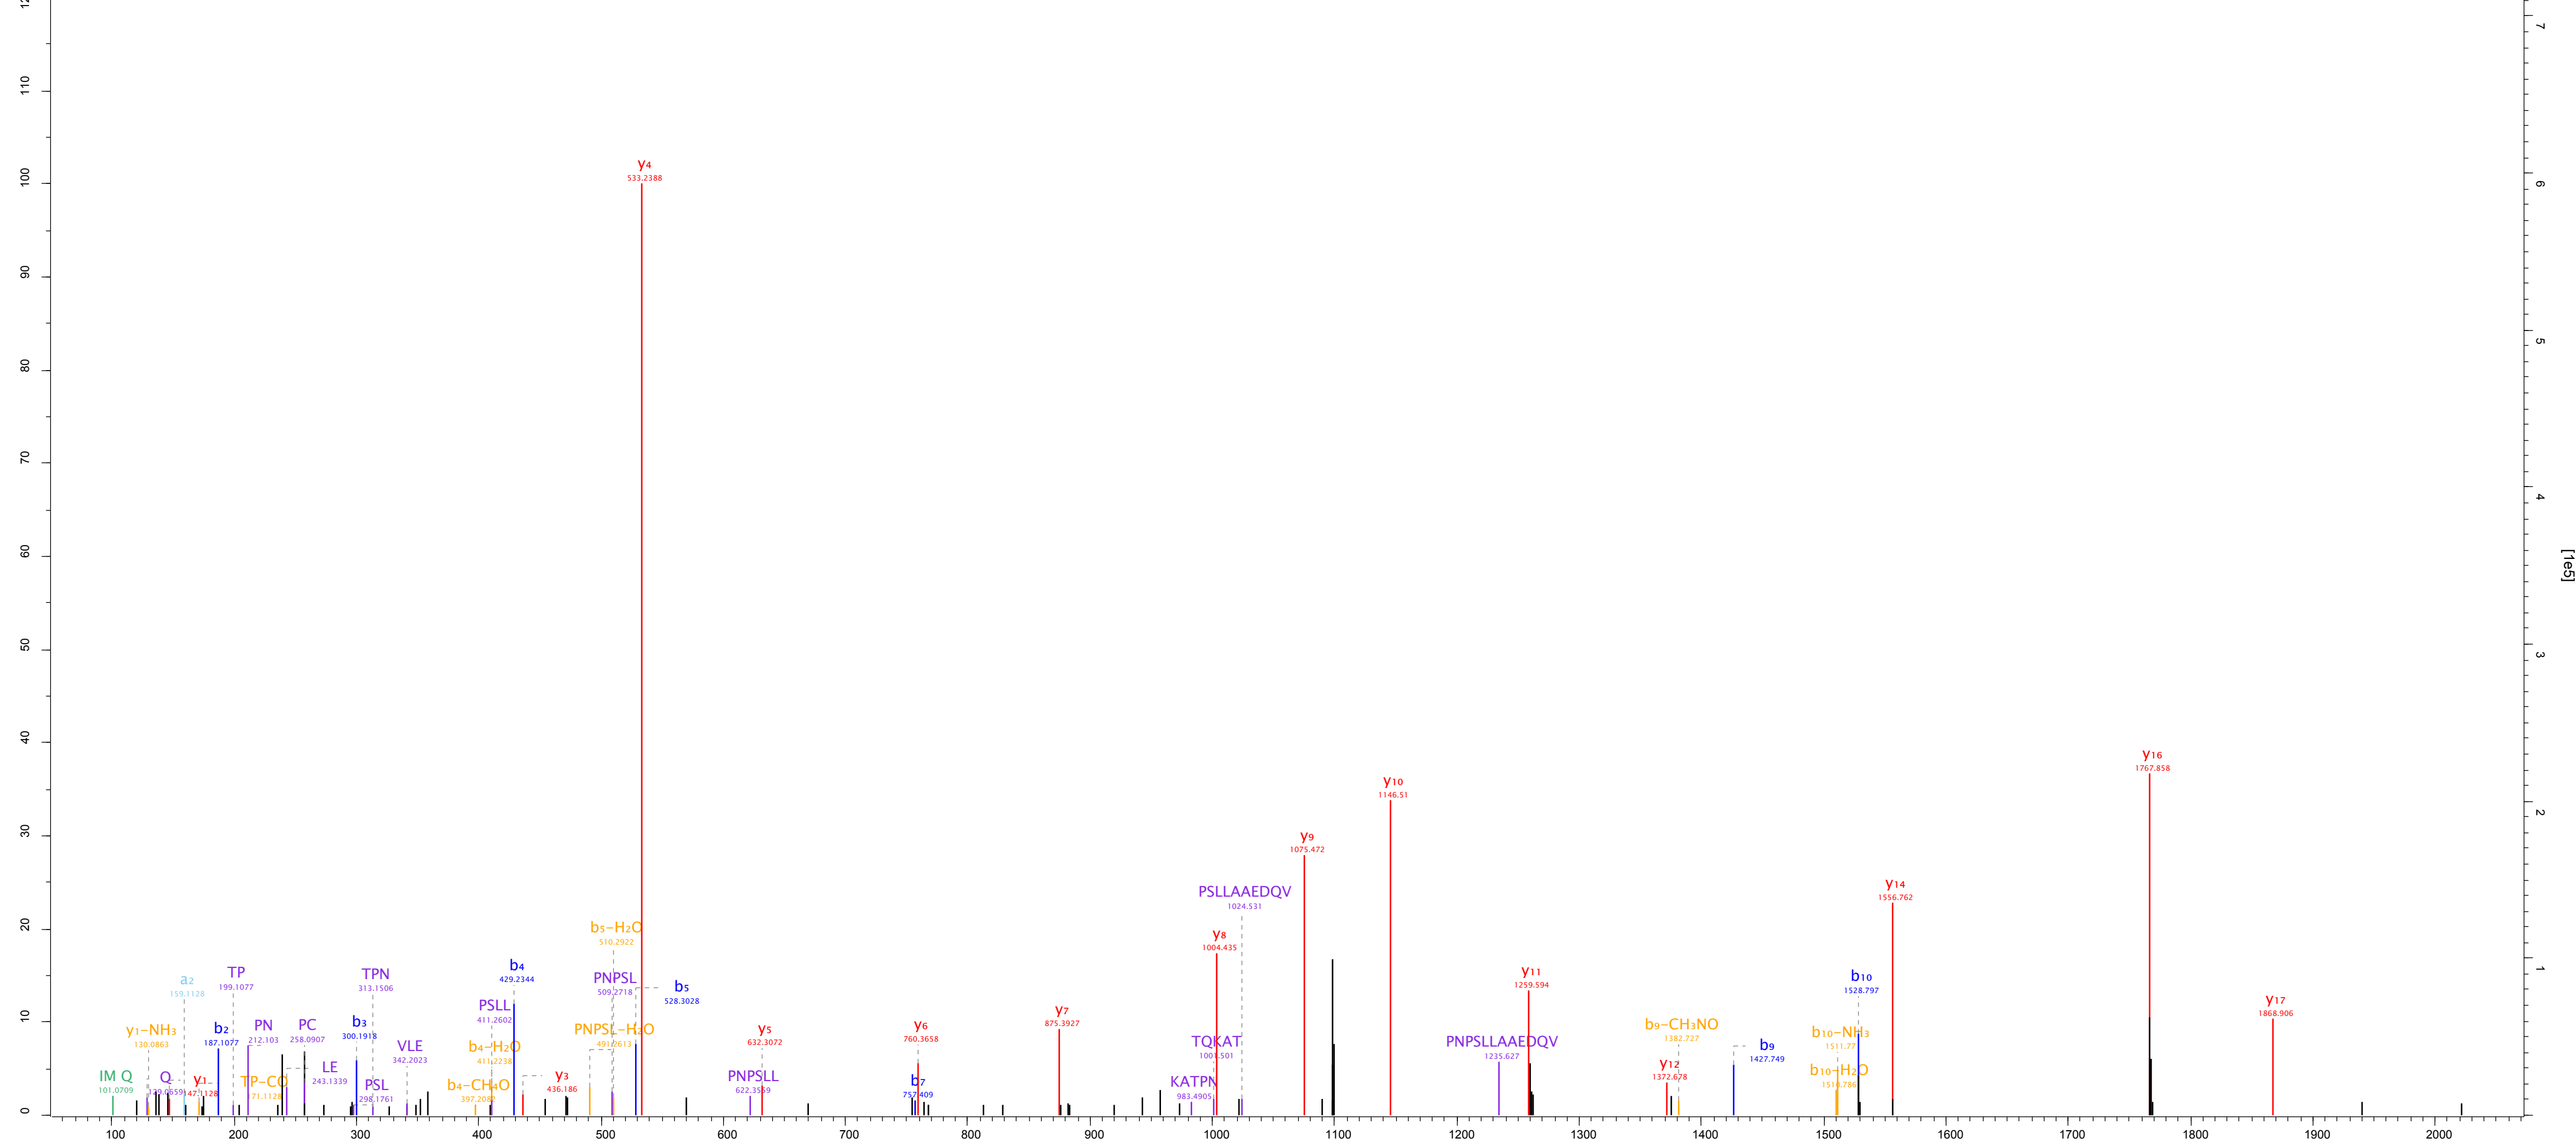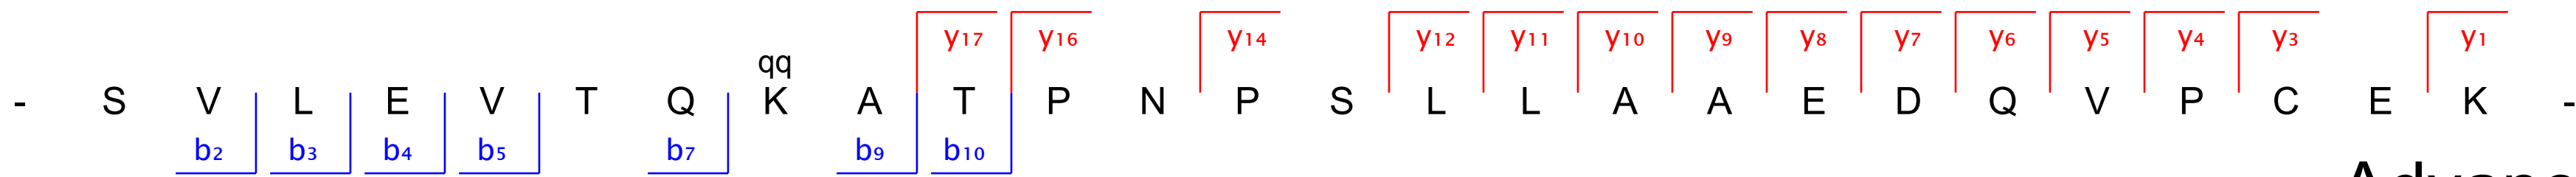

Advanced: POLH-K619-SUMO

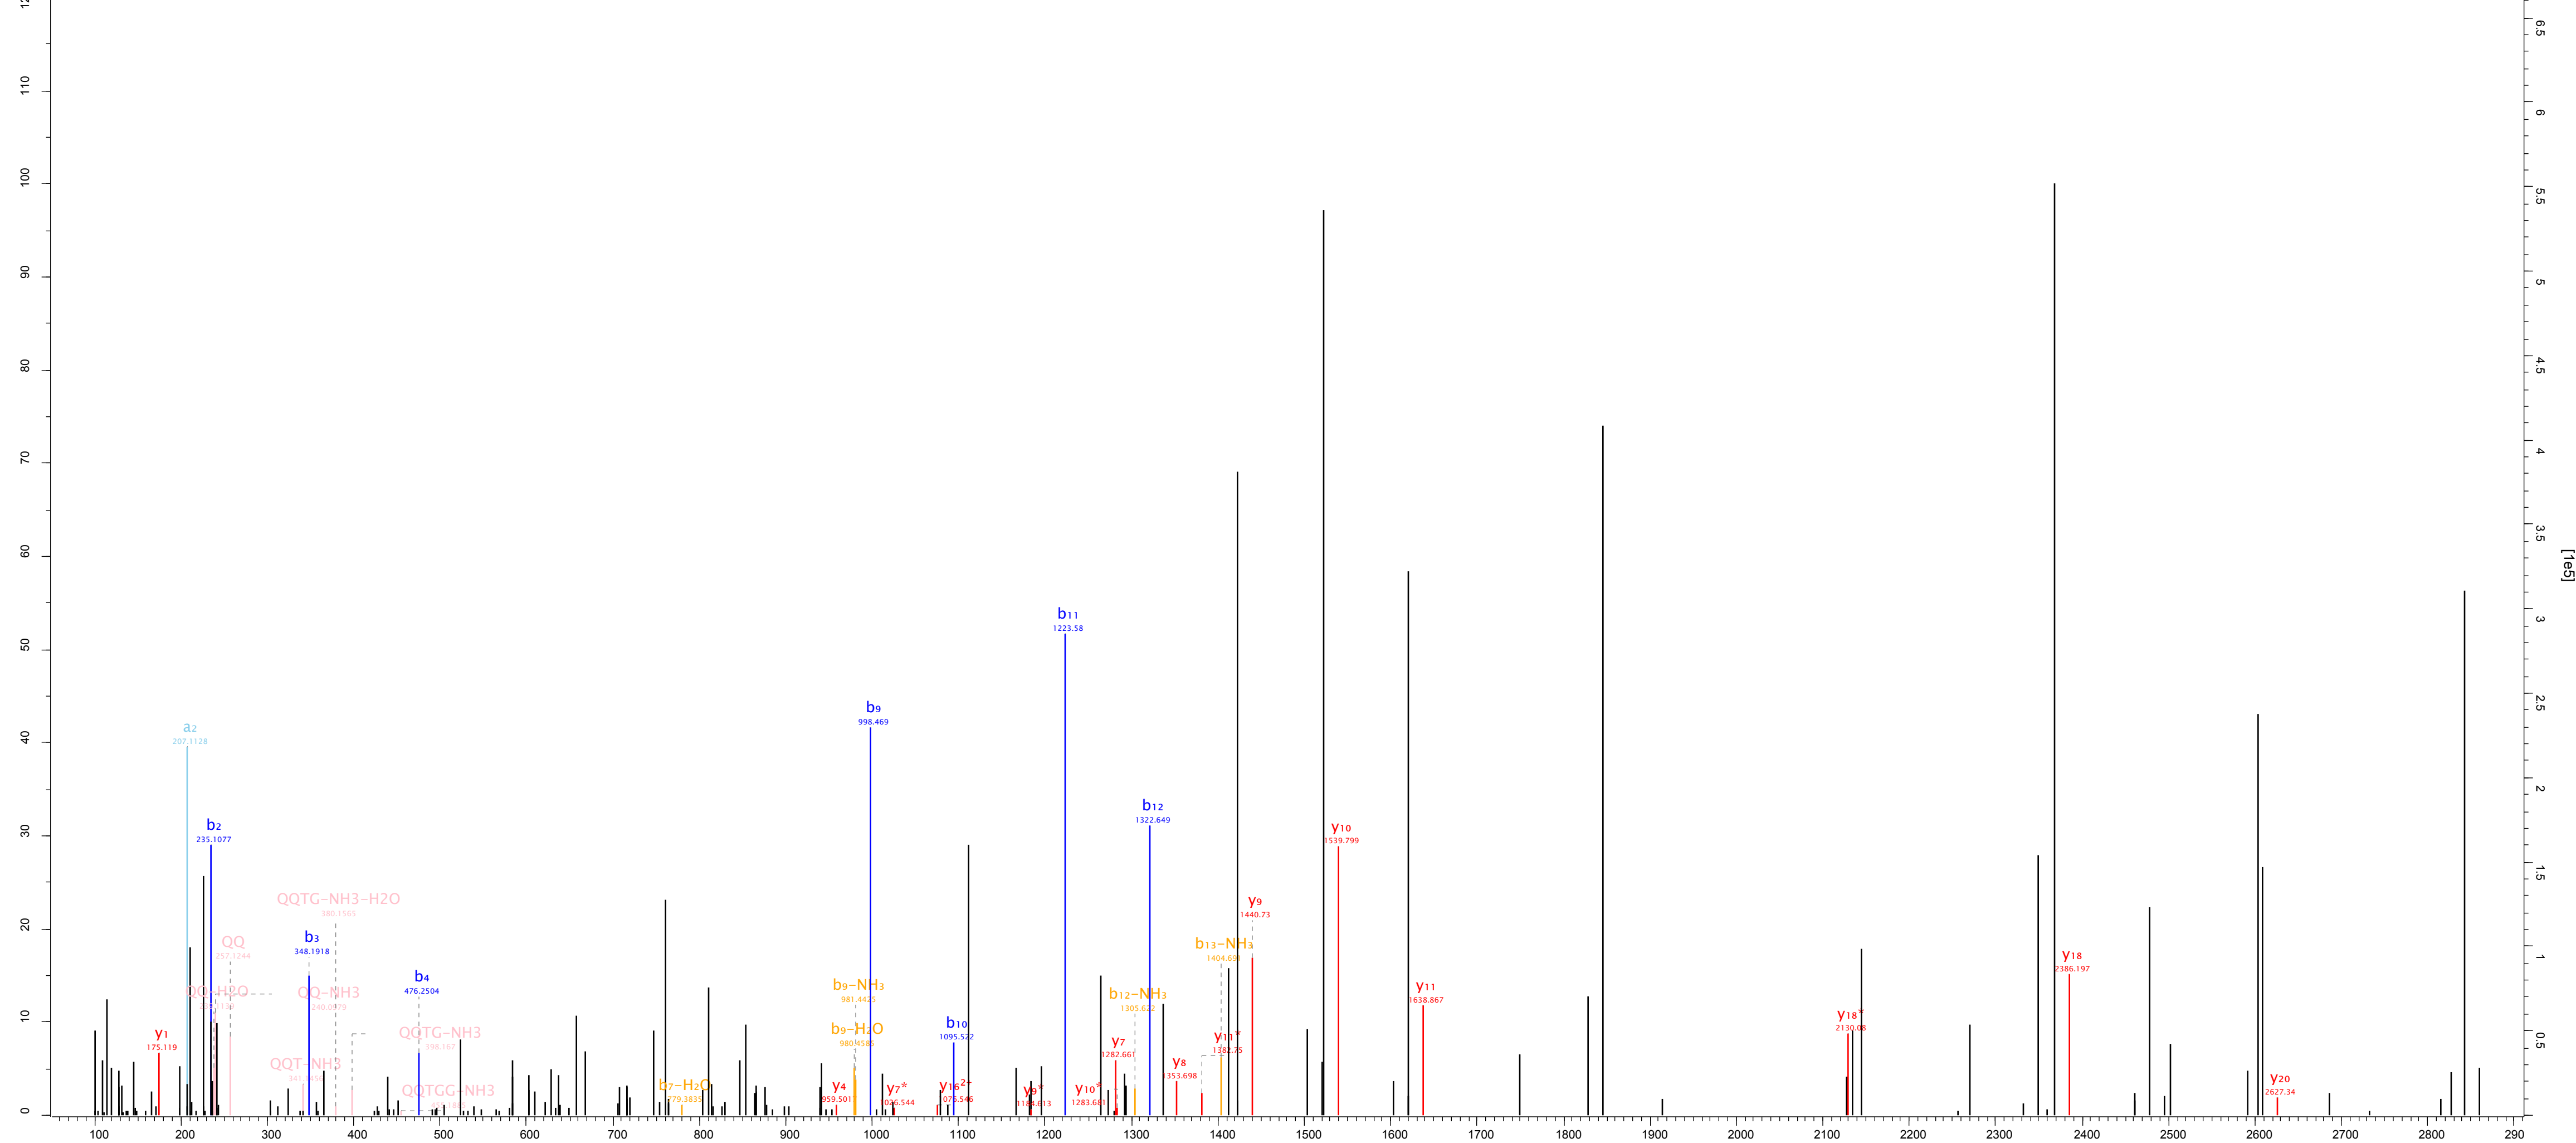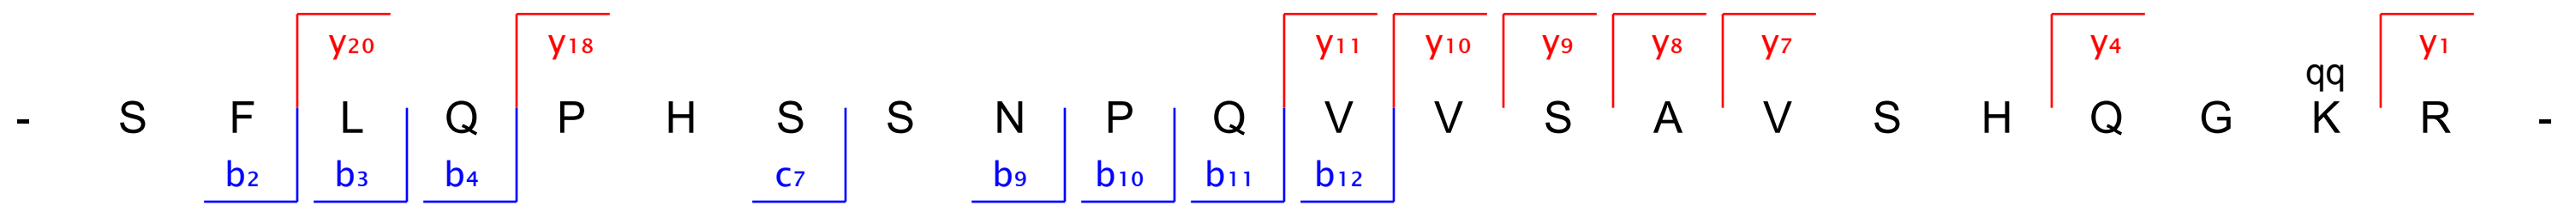

Standard: POLH-K682-SUMO

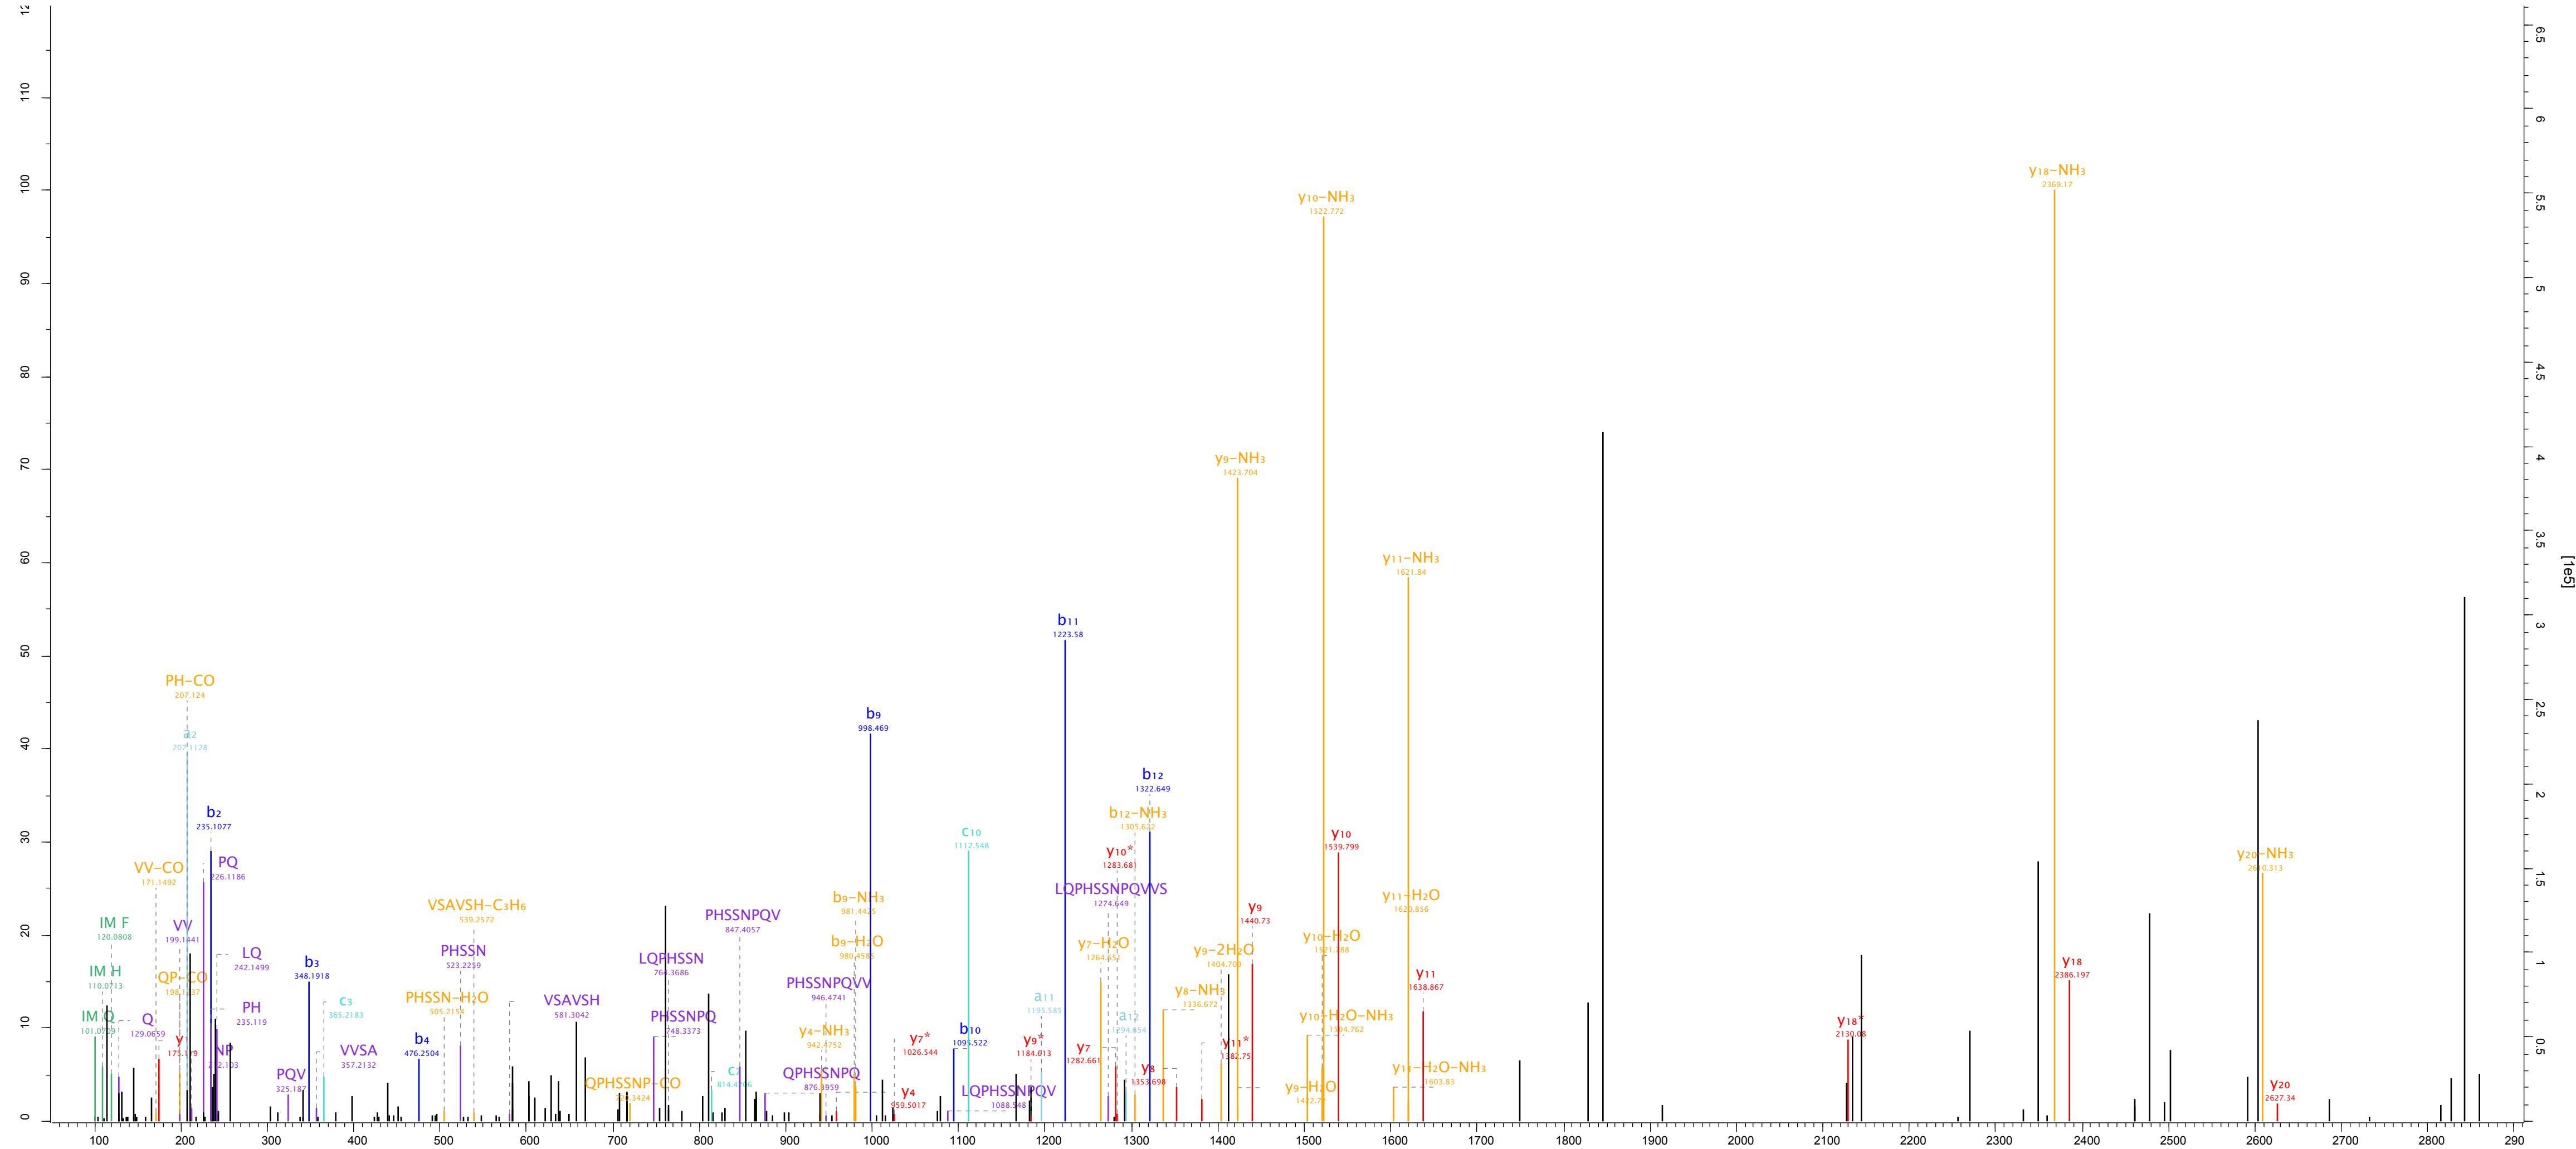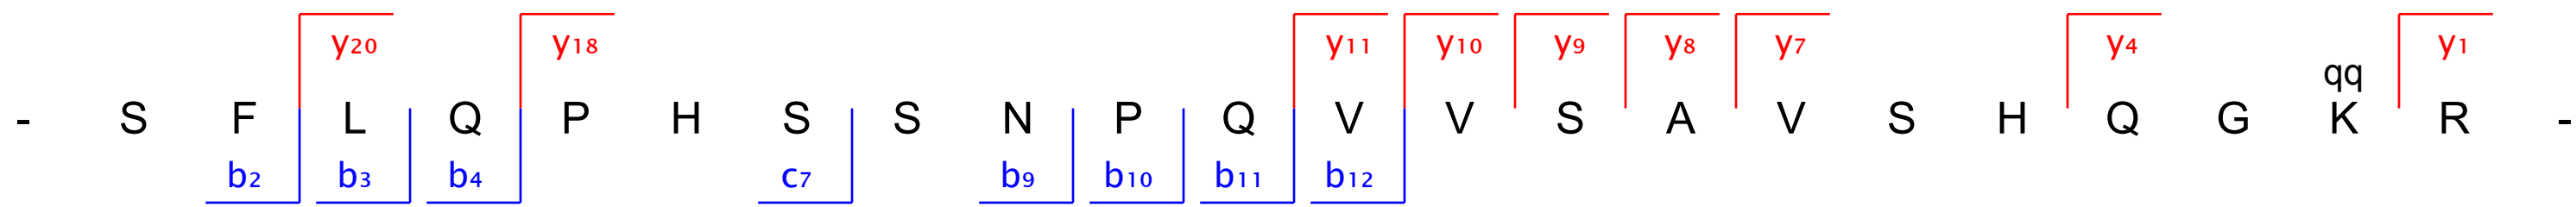

Advanced: POLH-K682-SUMO

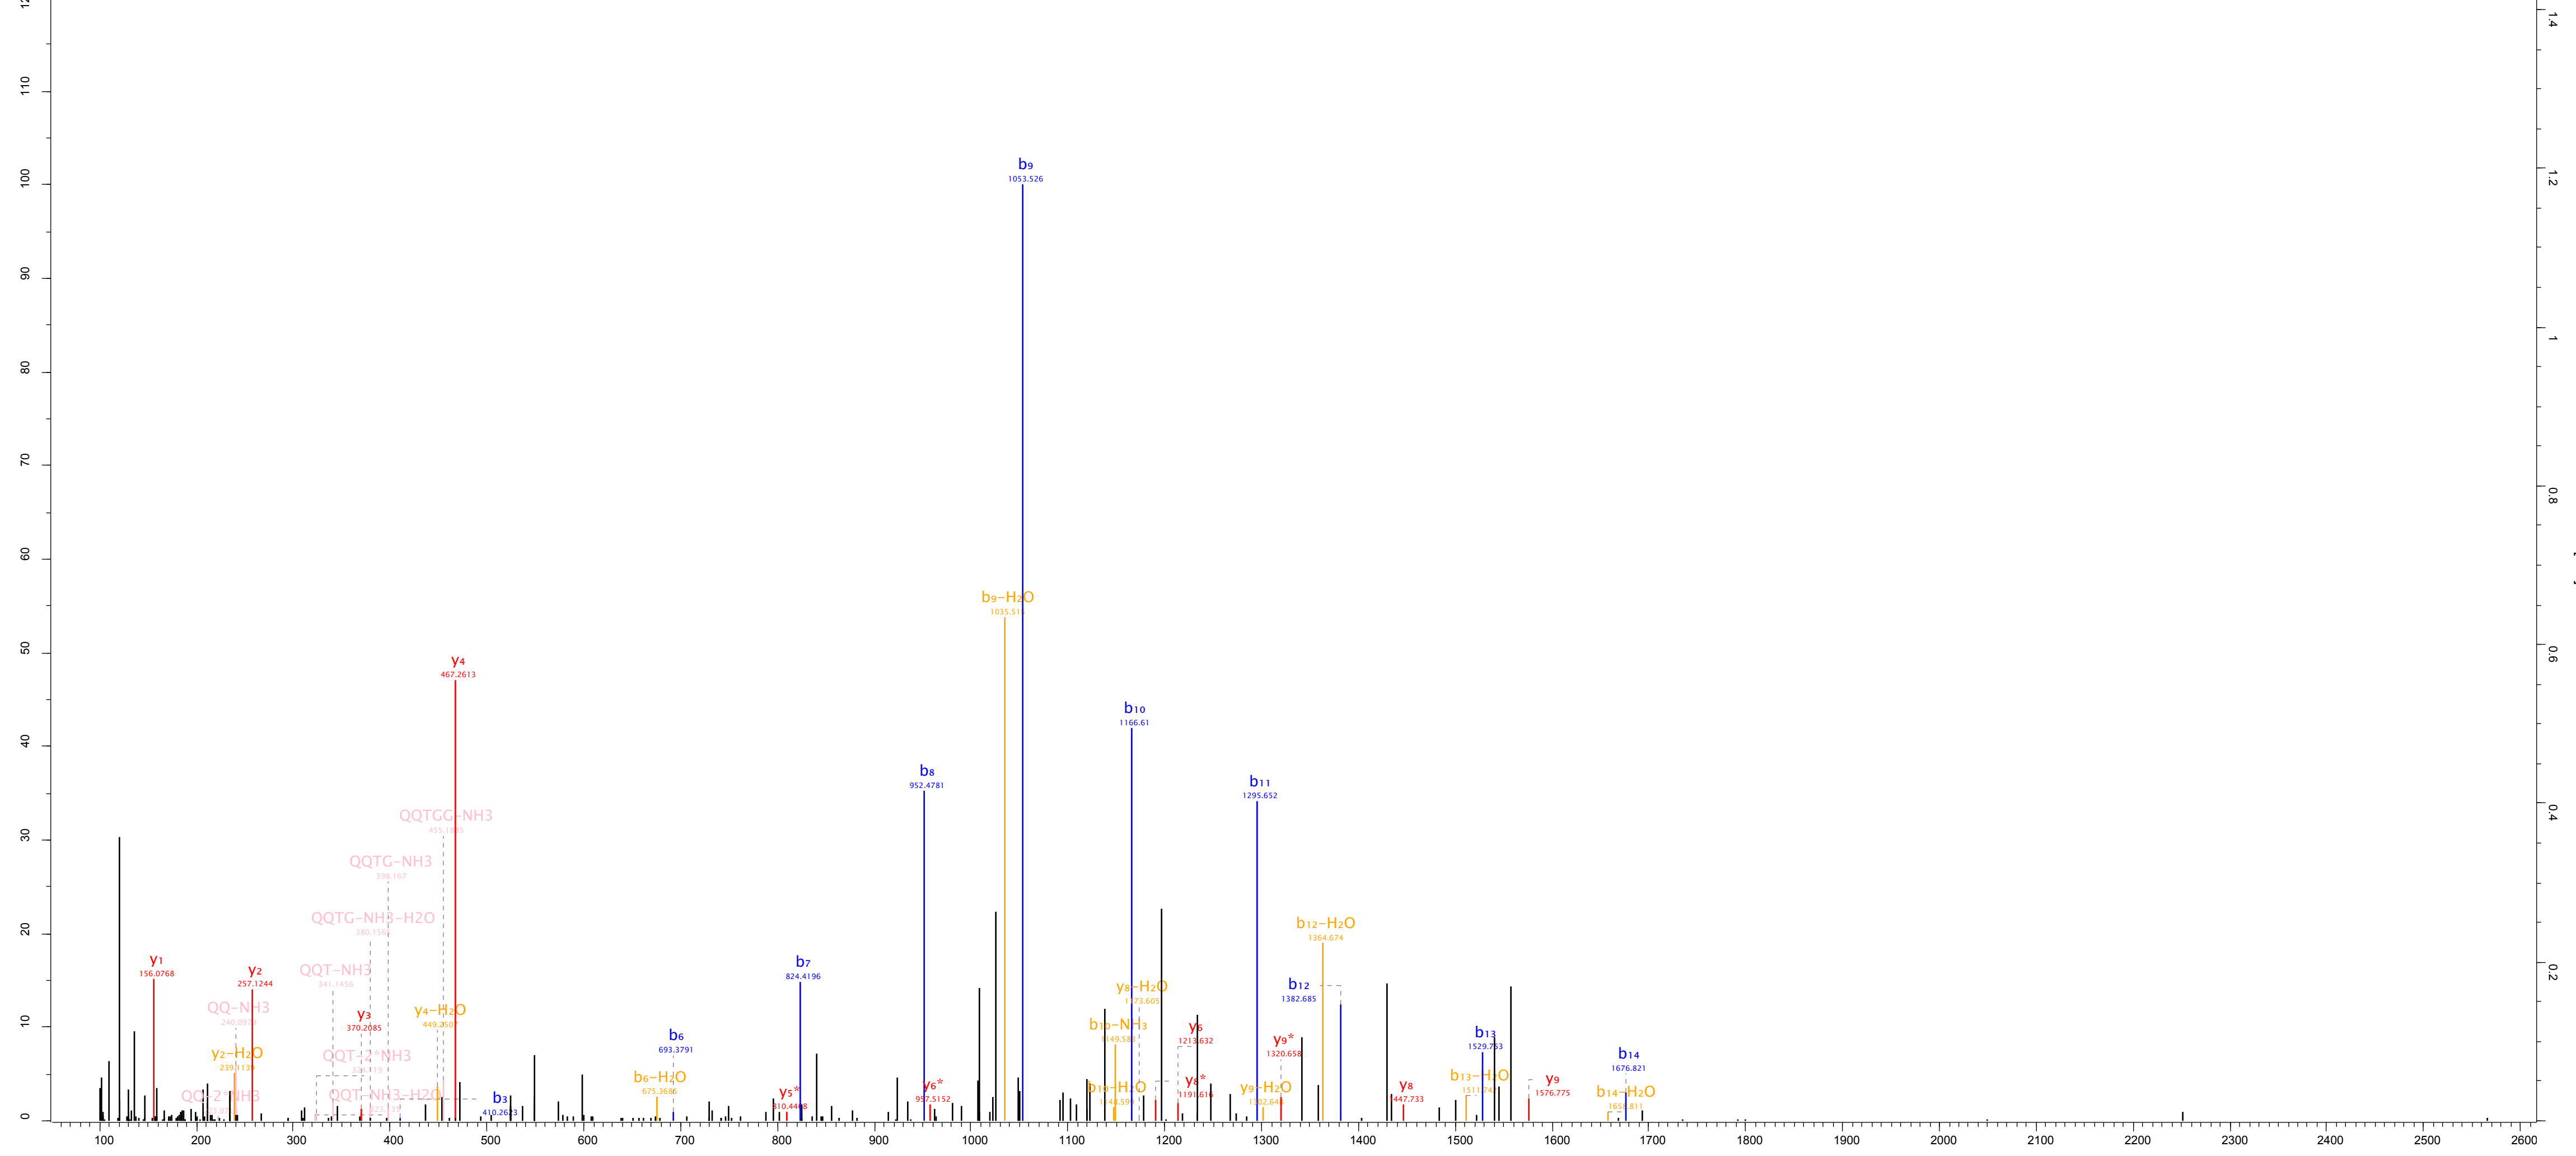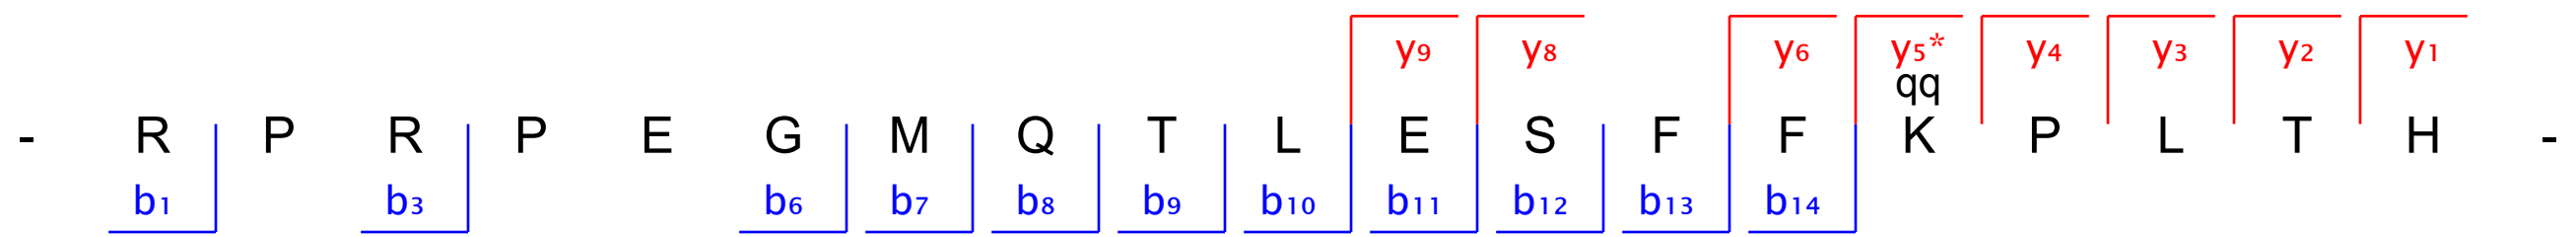

Standard: POLH-K709-SUMO

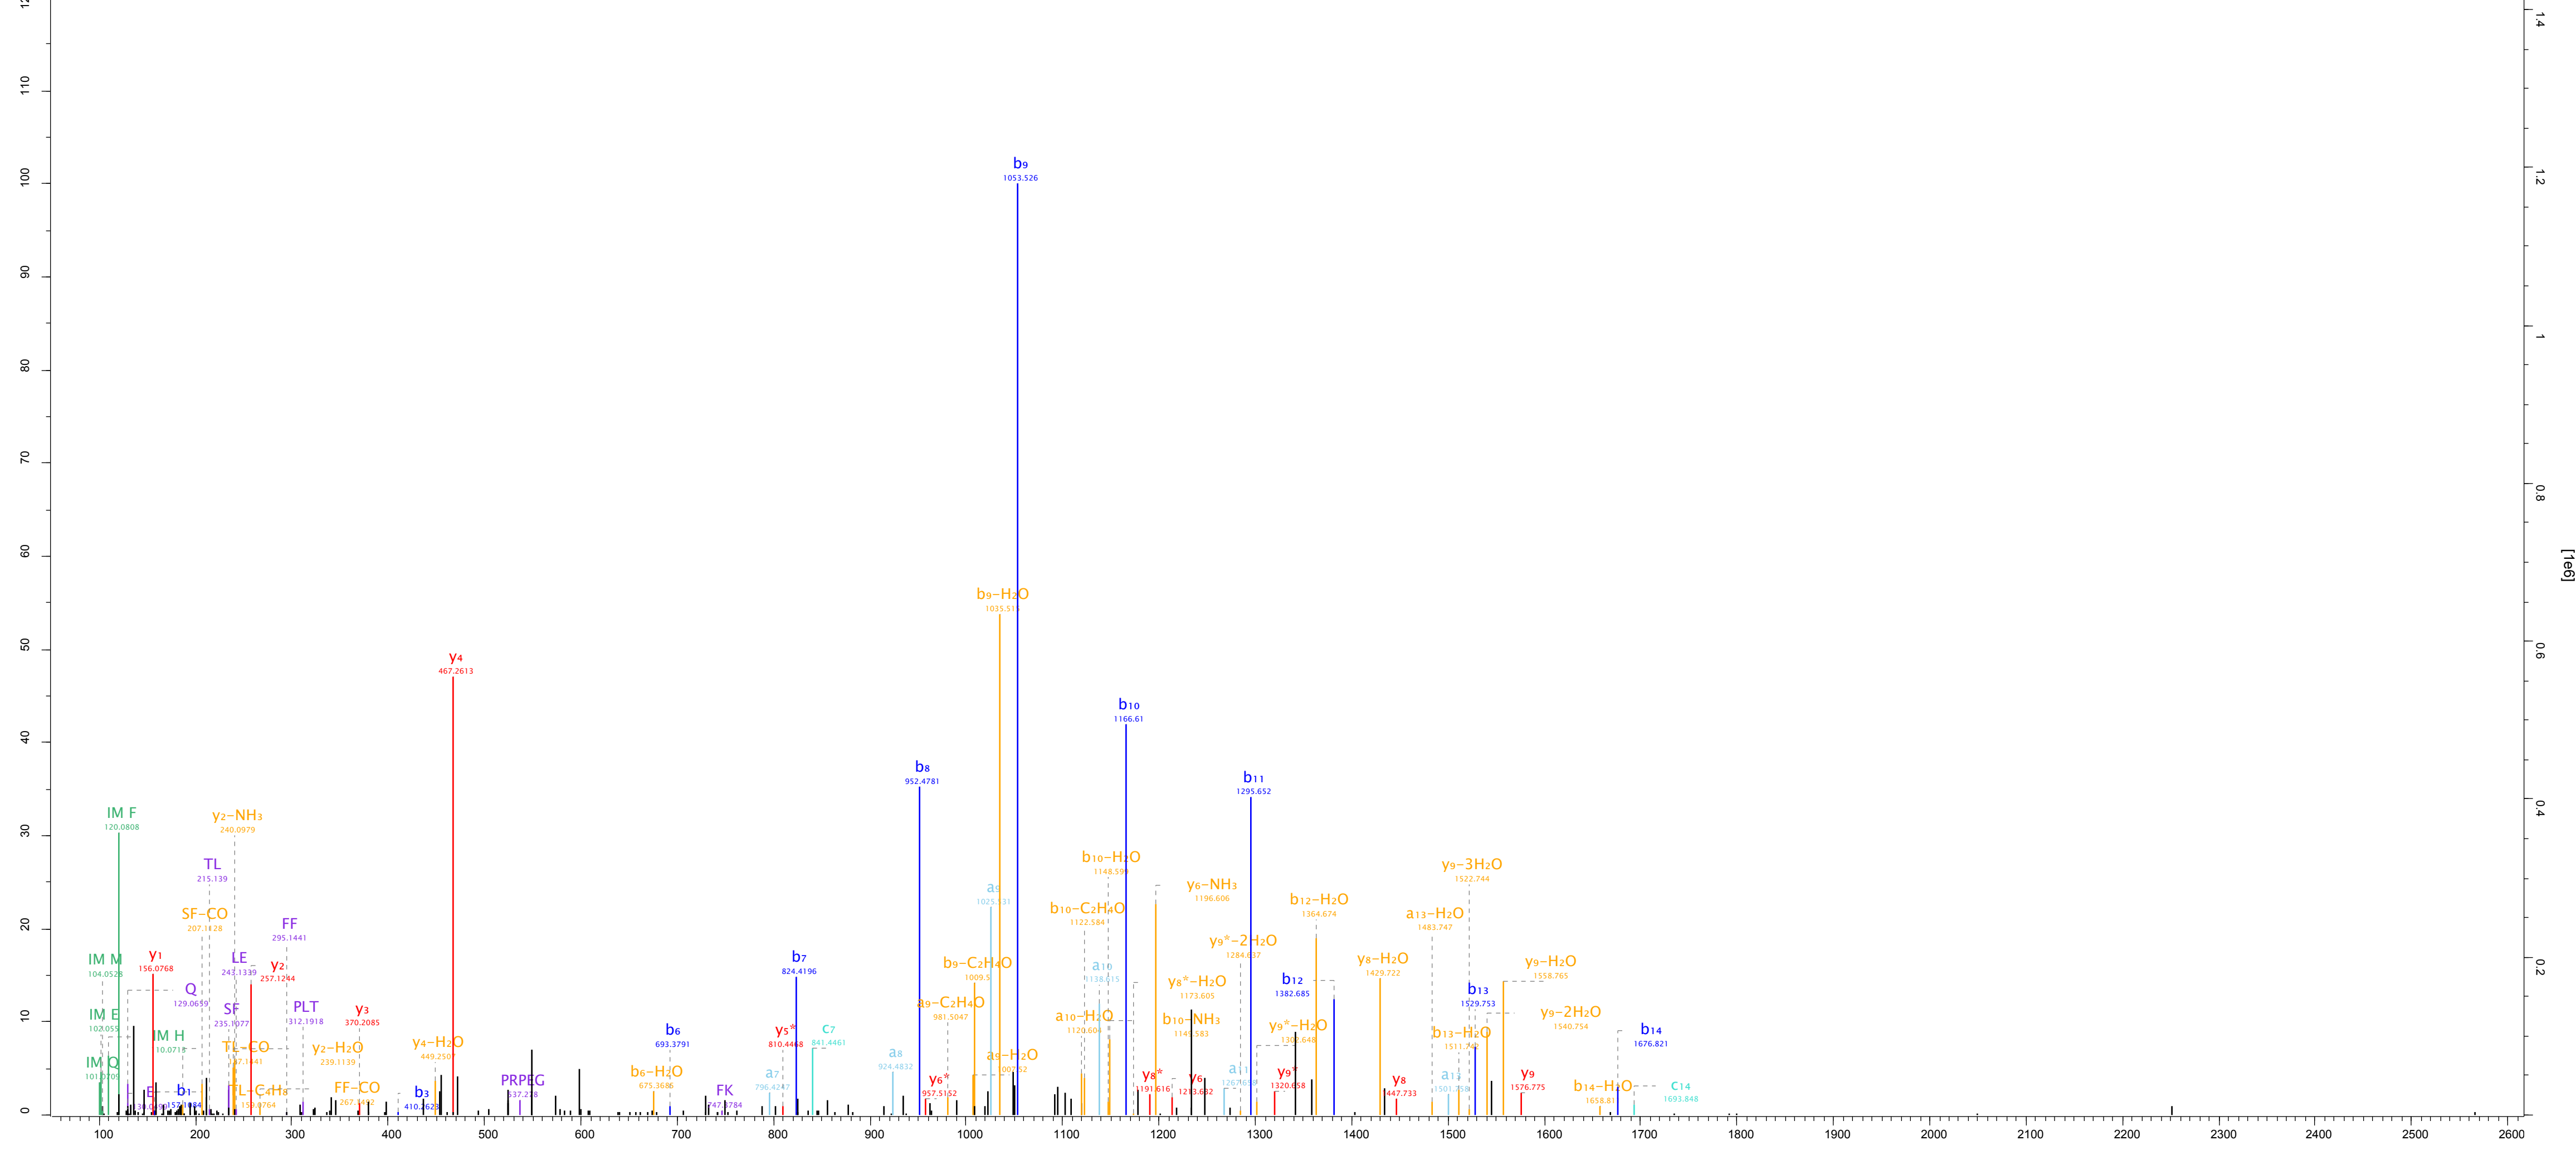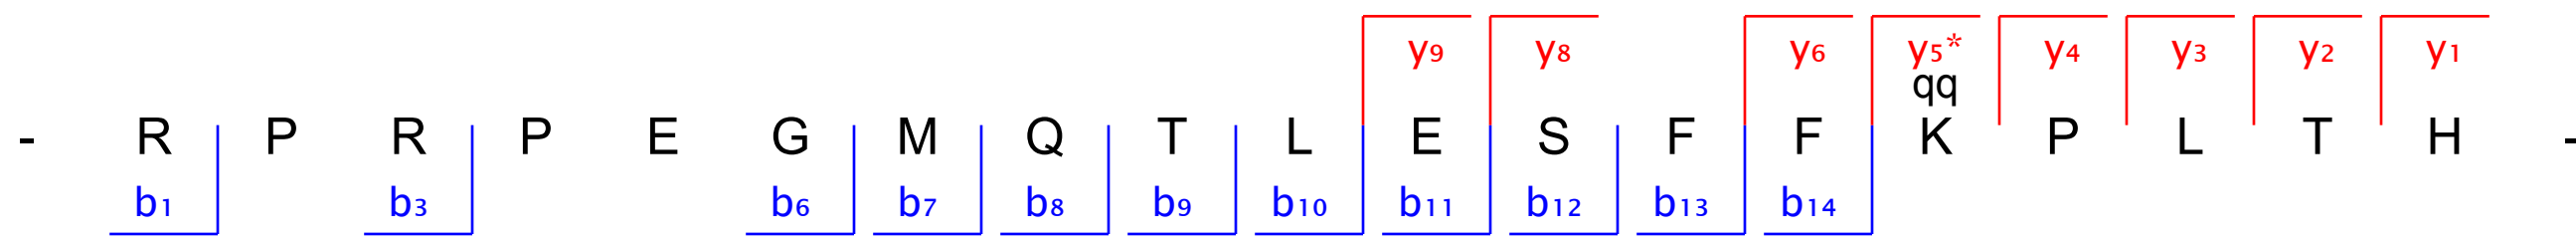

Advanced: POLH-K709-SUMO
